# Supplementary material
Source: PubMed Central journal article supplement (PMC4196745)
Supplement: ma5012039_si_001.pdf [file ma5012039_si_001.pdf]

# Supporting Information for

A Bicyclo[4.2.0]octene-Derived Monomer Provides Completely Linear Alternating Copolymers via Alternating Ring-Opening Metathesis Polymerization (AROMP)

*Li Tan, Kathlyn A. Parker,\* and Nicole S. Sampson\**

Department of Chemistry, Stony Brook University, Stony Brook, New York 11794-3400,  
United States

## Table of Contents

|                                                                                                                                                                   |    |
|-------------------------------------------------------------------------------------------------------------------------------------------------------------------|----|
| Table S1. Molecular weight and $D_M$ determined by GPC using polystyrene standards. ....                                                                          | 4  |
| Scheme S1. $t_{1/2}$ for each AROM-2 reaction step. ....                                                                                                          | 5  |
| Figure S1. GPC traces of alternating copolymer poly( <b>4-alt-6</b> ) <sub>50</sub> and the corresponding traces of poly( <b>1-alt-6</b> ) <sub>50</sub> . ....   | 6  |
| Figure S2. <sup>1</sup> H NMR spectrum of <b>2</b> in CD <sub>2</sub> Cl <sub>2</sub> . ....                                                                      | 7  |
| Figure S3. <sup>13</sup> C NMR spectrum of <b>2</b> in CDCl <sub>3</sub> . ....                                                                                   | 8  |
| Figure S4. <sup>1</sup> H NMR spectrum of <b>3</b> in acetone-d <sub>6</sub> . ....                                                                               | 9  |
| Figure S5. <sup>13</sup> C NMR spectrum of <b>3</b> in CDCl <sub>3</sub> . ....                                                                                   | 10 |
| Figure S6. <sup>1</sup> H NMR spectrum of <b>4</b> in acetone-d <sub>6</sub> . ....                                                                               | 11 |
| Figure S7. <sup>13</sup> C NMR spectrum of <b>4</b> in CDCl <sub>3</sub> . ....                                                                                   | 12 |
| Figure S8. <sup>1</sup> H NMR spectrum of <b>5</b> in CDCl <sub>3</sub> . ....                                                                                    | 13 |
| Figure S9. <sup>13</sup> C NMR spectrum of <b>5</b> in CDCl <sub>3</sub> . ....                                                                                   | 14 |
| Figure S10. <sup>1</sup> H NMR spectrum of poly( <b>3-alt-6</b> ) <sub>13</sub> in CD <sub>2</sub> Cl <sub>2</sub> . ....                                         | 15 |
| Figure S11. <sup>1</sup> H NMR spectrum of poly( <b>3-alt-6-d</b> ) <sub>6</sub> in CD <sub>2</sub> Cl <sub>2</sub> . ....                                        | 16 |
| Figure S12. <sup>1</sup> H NMR spectrum of poly( <b>4-alt-6</b> ) <sub>16</sub> obtained at 25 °C in CD <sub>2</sub> Cl <sub>2</sub> . ....                       | 17 |
| Figure S13. <sup>13</sup> C NMR spectrum of poly( <b>4-alt-6</b> ) <sub>16</sub> obtained at 25 °C in CD <sub>2</sub> Cl <sub>2</sub> . ....                      | 18 |
| Figure S14. HSQC spectrum of poly( <b>4-alt-6</b> ) <sub>16</sub> obtained at 25 °C in CD <sub>2</sub> Cl <sub>2</sub> . ....                                     | 19 |
| Figure S15. Alkene region of HSQC spectrum of poly( <b>4-alt-6</b> ) <sub>16</sub> obtained at 25 °C in CD <sub>2</sub> Cl <sub>2</sub> . ....                    | 20 |
| Figure S16. <sup>1</sup> H NMR spectrum of poly( <b>4-alt-6</b> ) <sub>16</sub> obtained at 35 °C in CDCl <sub>3</sub> . ....                                     | 21 |
| Figure S17. <sup>1</sup> H NMR spectrum of poly( <b>4-alt-6-d</b> ) <sub>15</sub> in CD <sub>2</sub> Cl <sub>2</sub> . ....                                       | 22 |
| Figure S18. <sup>1</sup> H NMR spectrum of crude poly( <b>4-alt-6</b> ) <sub>34</sub> obtained at 35 °C in CD <sub>2</sub> Cl <sub>2</sub> . ....                 | 23 |
| Figure S19. <sup>1</sup> H NMR spectrum of poly( <b>4-alt-6</b> ) <sub>36</sub> obtained at 60 °C in CD <sub>2</sub> Cl <sub>2</sub> . ....                       | 24 |
| Figure S20. <sup>1</sup> H NMR spectrum of poly( <b>5-alt-6</b> ) <sub>10</sub> in CD <sub>2</sub> Cl <sub>2</sub> . ....                                         | 25 |
| Figure S21. <sup>1</sup> H NMR spectrum of <i>E</i> -stilbene in CD <sub>2</sub> Cl <sub>2</sub> . ....                                                           | 26 |
| Figure S22. <sup>13</sup> C NMR spectrum of <i>E</i> -stilbene in CD <sub>2</sub> Cl <sub>2</sub> (fraction I). ....                                              | 27 |
| Figure S23. HSQC spectrum of <i>E</i> -stilbene in CD <sub>2</sub> Cl <sub>2</sub> (fraction I). ....                                                             | 28 |
| Figure S24. <sup>1</sup> H NMR spectrum of partially purified Ph-( <b>3-alt-6</b> )-Ph in CD <sub>2</sub> Cl <sub>2</sub> (fraction II). ....                     | 29 |
| Figure S25. <sup>13</sup> C NMR spectrum of partially purified Ph-( <b>3-alt-6</b> )-Ph in CD <sub>2</sub> Cl <sub>2</sub> (fraction II). ....                    | 30 |
| Figure S26. <sup>1</sup> H NMR spectrum of partially purified Ph-( <b>3-alt-6</b> )-Ph in CD <sub>2</sub> Cl <sub>2</sub> (fraction II). ....                     | 31 |
| Figure S27. <sup>1</sup> H NMR spectrum of partially purified <i>cyc</i> -( <b>3-alt-6</b> ) <sub>1</sub> in CD <sub>2</sub> Cl <sub>2</sub> (fraction III). .... | 32 |
| Figure S28. ROM of monomer <b>1</b> in CD <sub>2</sub> Cl <sub>2</sub> monitored by <sup>1</sup> H NMR spectroscopy as a function of time. ....                   | 33 |
| Figure S29. ROM of monomer <b>3</b> in CD <sub>2</sub> Cl <sub>2</sub> monitored by <sup>1</sup> H NMR spectroscopy as a function of time. ....                   | 34 |
| Figure S30. ROM of monomer <b>4</b> in CD <sub>2</sub> Cl <sub>2</sub> monitored by <sup>1</sup> H NMR spectroscopy as a function of time. ....                   | 35 |
| Figure S31. ROM of monomer <b>5</b> in CD <sub>2</sub> Cl <sub>2</sub> monitored by <sup>1</sup> H NMR spectroscopy as a function of time. ....                   | 36 |

|                                                                                                                                                                                                                                              |    |
|----------------------------------------------------------------------------------------------------------------------------------------------------------------------------------------------------------------------------------------------|----|
| Figure S32. AROMP of monomer <b>3</b> and cyclohexene <b>6</b> ([Ru]: <b>3</b> : <b>6</b> =1:25:50) in CD <sub>2</sub> Cl <sub>2</sub> monitored by <sup>1</sup> H NMR spectroscopy as a function of time. ....                              | 37 |
| Figure S33. AROMP of monomer <b>4</b> and cyclohexene <b>6</b> ([Ru]: <b>4</b> : <b>6</b> =1:20:40) in CD <sub>2</sub> Cl <sub>2</sub> monitored by <sup>1</sup> H NMR spectroscopy as a function of time. ....                              | 38 |
| Figure S34. AROMP of monomer <b>5</b> and cyclohexene <b>6</b> ([Ru]: <b>5</b> : <b>6</b> =1:50:100) in CD <sub>2</sub> Cl <sub>2</sub> monitored by <sup>1</sup> H NMR spectroscopy as a function of time. ....                             | 39 |
| Figure S35. The AROM conversion of [Ru]- <b>4</b> enoic carbene to [Ru]- <b>6-4</b> alkylidene with excess cyclohexene <b>6</b> in CD <sub>2</sub> Cl <sub>2</sub> .....                                                                     | 40 |
| Figure S36. The AROM conversion of [Ru]- <b>3</b> enoic carbene to [Ru]- <b>6-3</b> alkylidene with excess cyclohexene <b>6</b> in CD <sub>2</sub> Cl <sub>2</sub> .....                                                                     | 41 |
| Figure S37. Conversion of [Ru]- <b>6-4</b> alkylidene (1 eq) to [Ru]- <b>6-4-6-4</b> alkylidene in double AROM (AROM-2) with monomer <b>4</b> (1 eq) in the presence of excess cyclohexene <b>6</b> in CD <sub>2</sub> Cl <sub>2</sub> ..... | 42 |
| Figure S38. Conversion of monomer <b>4</b> (1 eq) in double AROM (AROM-2) with [Ru]- <b>6-4</b> (1 eq) and excess cyclohexene <b>6</b> in CD <sub>2</sub> Cl <sub>2</sub> .....                                                              | 43 |
| Figure S39. Conversion of [Ru]- <b>6-3</b> alkylidene (1 eq) to [Ru]- <b>6-3-6-3</b> alkylidene in double AROM (AROM-2) with monomer <b>3</b> (1eq) in the presence of excess cyclohexene <b>6</b> in CD <sub>2</sub> Cl <sub>2</sub> . .... | 44 |
| Figure S40. Conversion of monomer <b>3</b> (1 eq) in double AROM (AROM-2) with [Ru]- <b>6-3</b> (1 eq) and excess cyclohexene <b>6</b> in CD <sub>2</sub> Cl <sub>2</sub> .....                                                              | 45 |
| Figure S41. Conversion of [Ru]- <b>6-4</b> alkylidene (1 eq) to [Ru]- <b>6-3-6-4</b> alkylidene in double AROM (AROM-2) with monomer <b>3</b> (1 eq) in the presence of excess cyclohexene <b>6</b> in CD <sub>2</sub> Cl <sub>2</sub> ..... | 46 |
| Figure S42. Conversion of monomer <b>3</b> (1 eq) in double AROM (AROM-2) with [Ru]- <b>6-4</b> (1 eq) and excess cyclohexene <b>6</b> in CD <sub>2</sub> Cl <sub>2</sub> .....                                                              | 47 |
| Figure S43. Conversion of [Ru]- <b>6-3</b> alkylidene (1 eq) to [Ru]- <b>6-4-6-3</b> alkylidene in double AROM (AROM-2) with monomer <b>4</b> (1 eq) in the presence of excess cyclohexene <b>6</b> in CD <sub>2</sub> Cl <sub>2</sub> ..... | 48 |
| Figure S44. Conversion of monomer <b>4</b> (1 eq) in double AROM (AROM-2) with [Ru]- <b>6-3</b> (1 eq) and excess cyclohexene <b>6</b> in CD <sub>2</sub> Cl <sub>2</sub> .....                                                              | 49 |
| References.....                                                                                                                                                                                                                              | 50 |

Table S1. Molecular weight and  $D_M$  determined by GPC using polystyrene standards.

| Polymer                                                       | Temp  | Cald. $M_n$ | $M_n$ | $M_w$ | $D_M$ |
|---------------------------------------------------------------|-------|-------------|-------|-------|-------|
| poly(4- <i>alt</i> -6) <sub>16</sub>                          | 25 °C | 5064        | 10005 | 22682 | 2.0   |
| poly(4- <i>alt</i> -6) <sub>16</sub>                          | 35 °C | 5064        | 10005 | 18855 | 1.8   |
| poly(4- <i>alt</i> -6- <i>d</i> <sub>10</sub> ) <sub>15</sub> | 35 °C | 5064        | 12716 | 21298 | 1.7   |
| poly(4- <i>alt</i> -6) <sub>34</sub>                          | 35 °C | 12504       | 14552 | 26512 | 1.8   |
| poly(4- <i>alt</i> -6) <sub>36</sub>                          | 60 °C | 12504       | 11420 | 24936 | 2.1   |
| poly(3- <i>alt</i> -6- <i>d</i> <sub>10</sub> ) <sub>6</sub>  | 25 °C | 1556        | 2046  | 7677  | 3.75  |

GPC determined  $M_n$  is larger than calculated  $M_n$  due to the Benoit effect.<sup>1</sup>

Scheme S1.  $t_{1/2}$  for each AROM-2 reaction step.

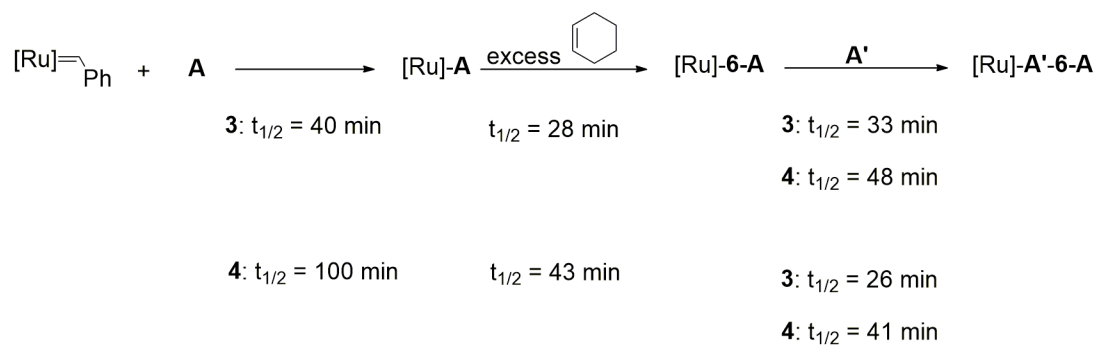

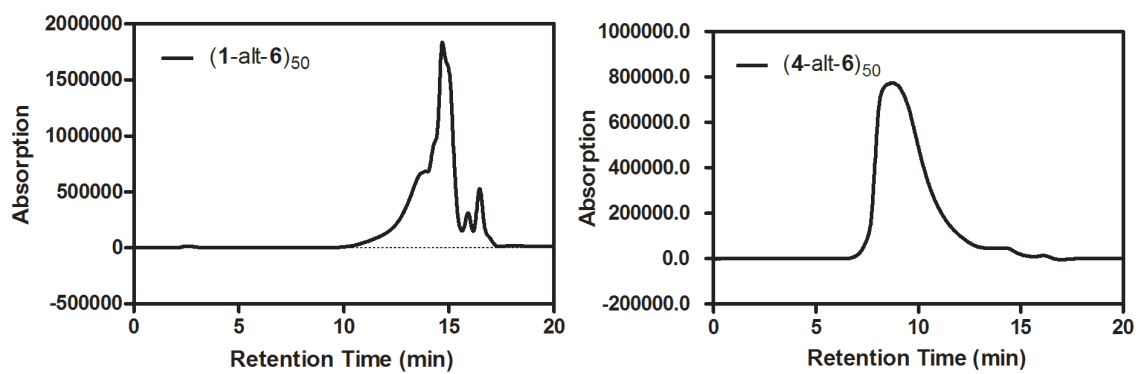

Figure S1. GPC traces of alternating copolymer poly(4-*alt*-6)<sub>50</sub> and the corresponding traces of poly(1-*alt*-6)<sub>50</sub>.

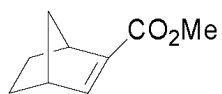

Compound 2

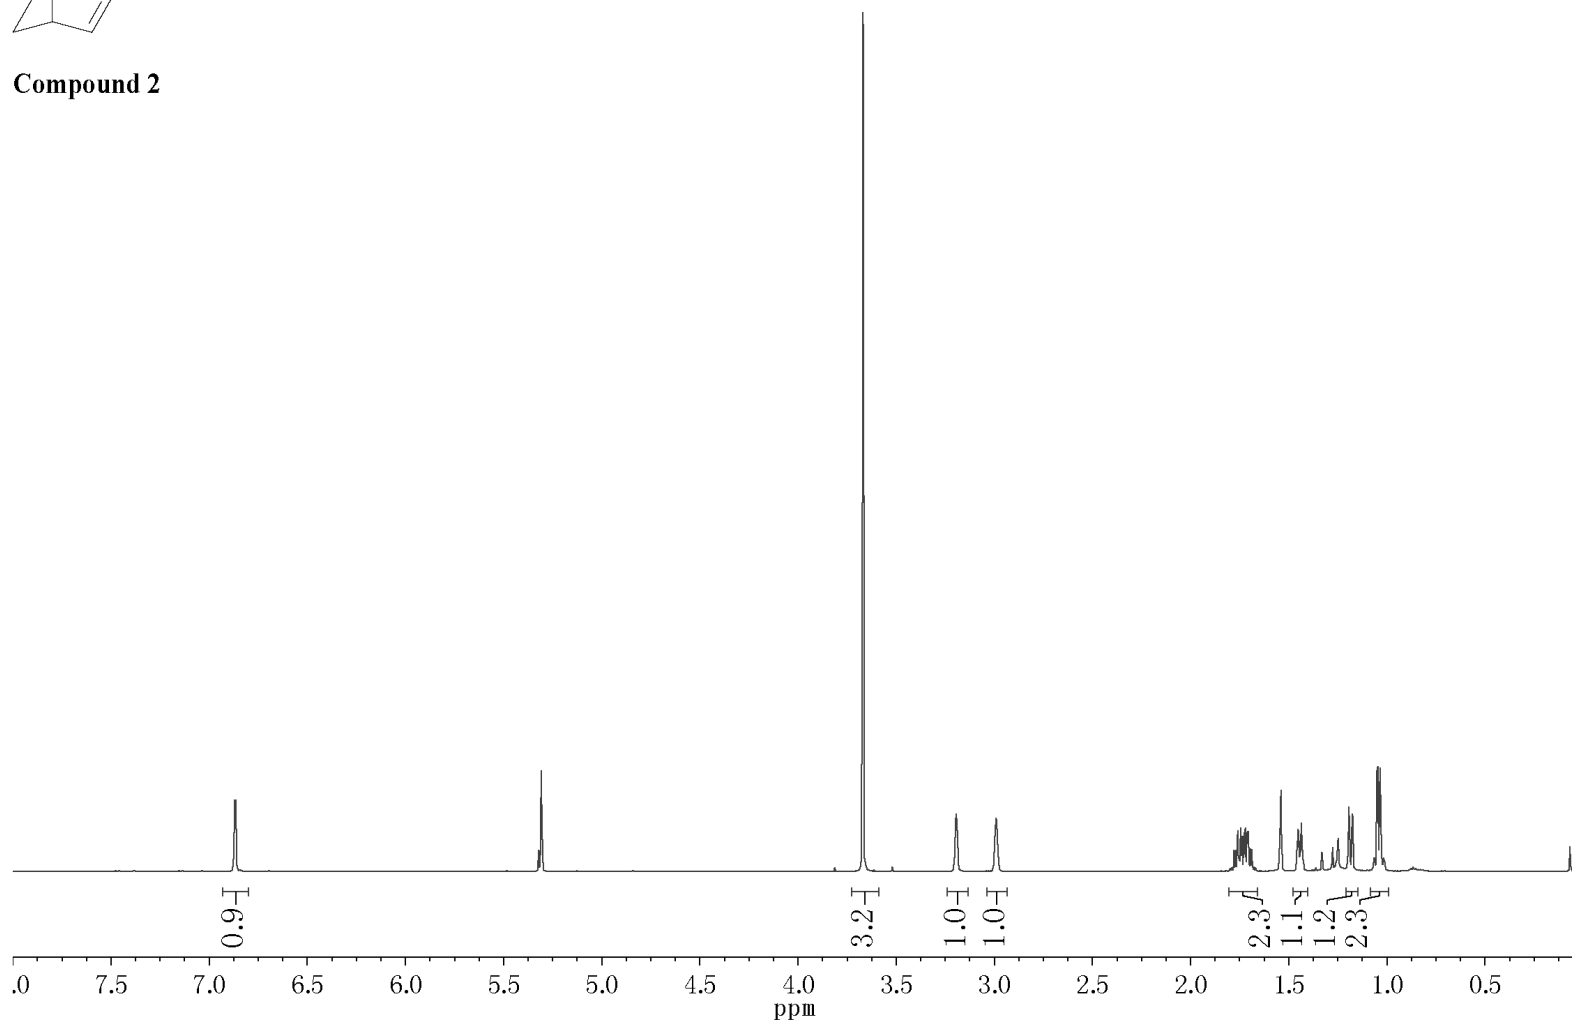

Figure S2.  $^1\text{H}$  NMR spectrum of **2** in  $\text{CD}_2\text{Cl}_2$ .

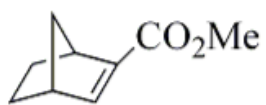

**Compound 2**

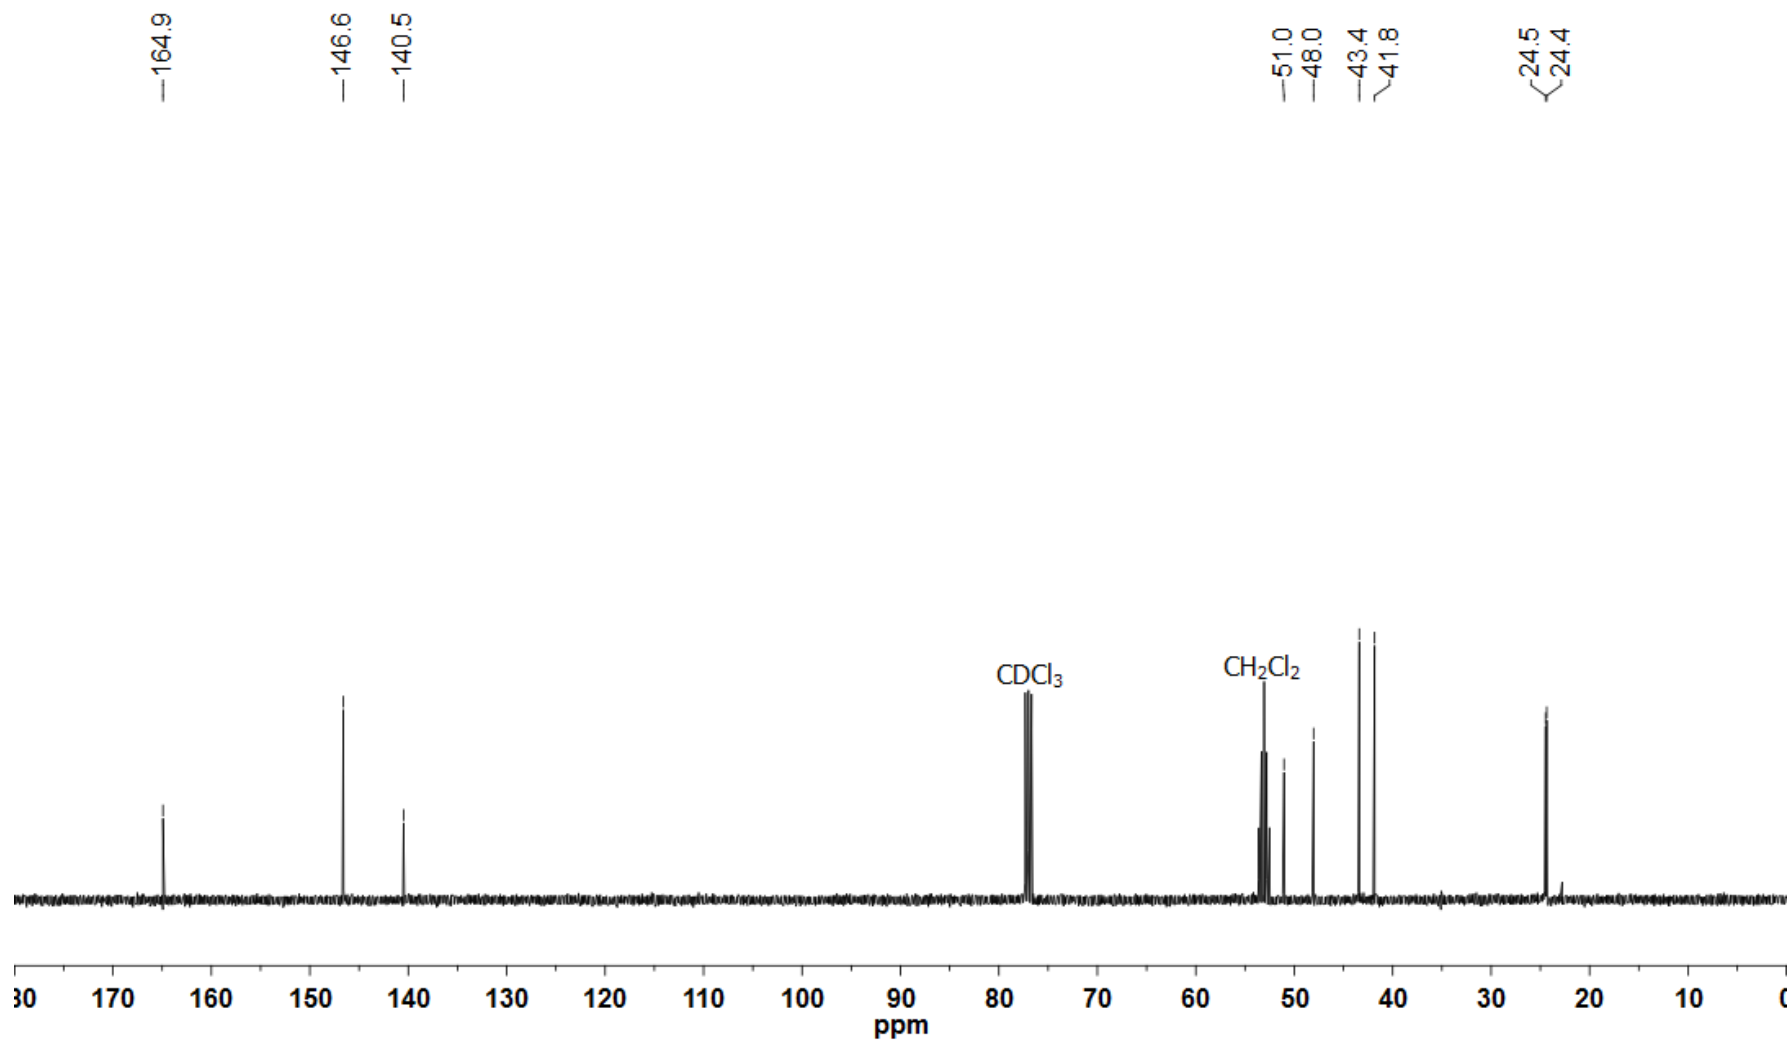

Figure S3.  $^{13}\text{C}$  NMR spectrum of **2** in  $\text{CDCl}_3$ .



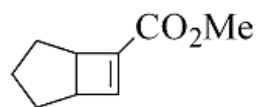

**Compound 3**

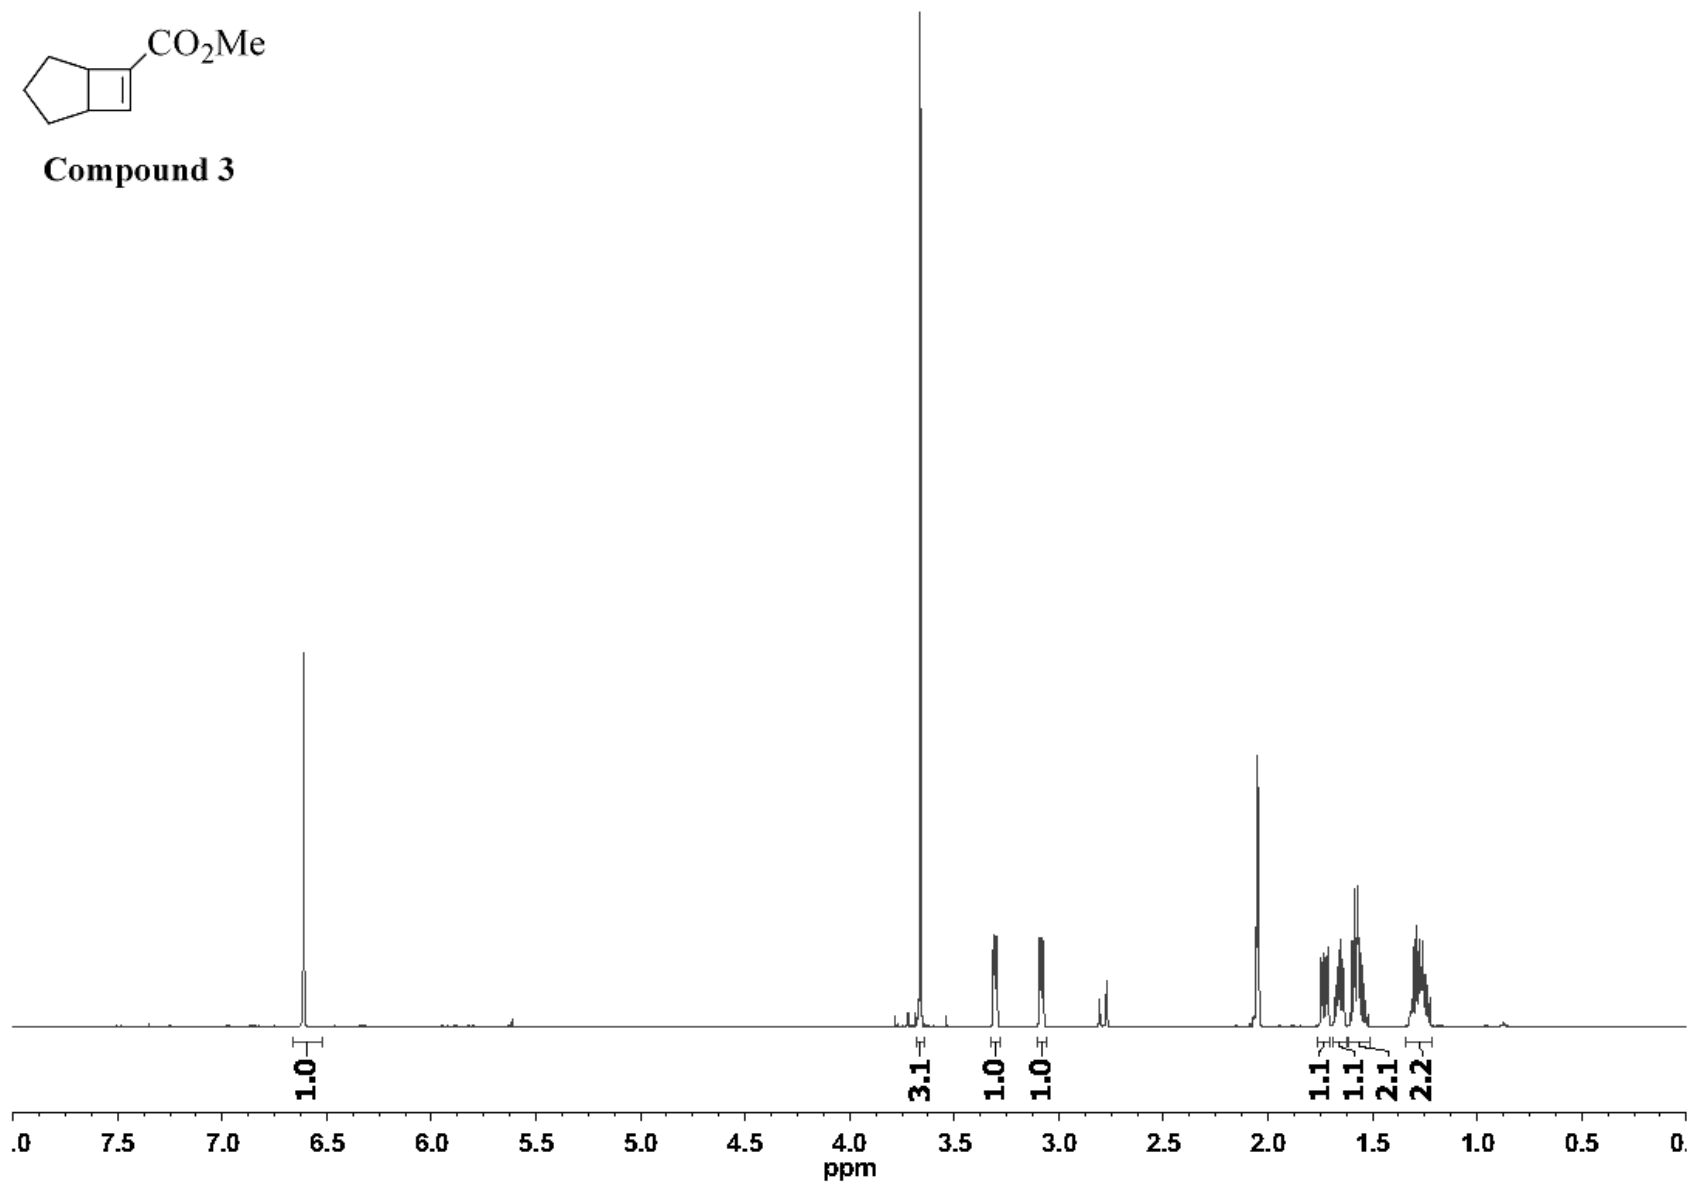

Figure S4.  $^1\text{H}$  NMR spectrum of **3** in acetone- $\text{d}_6$ .

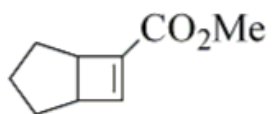

**Compound 3**

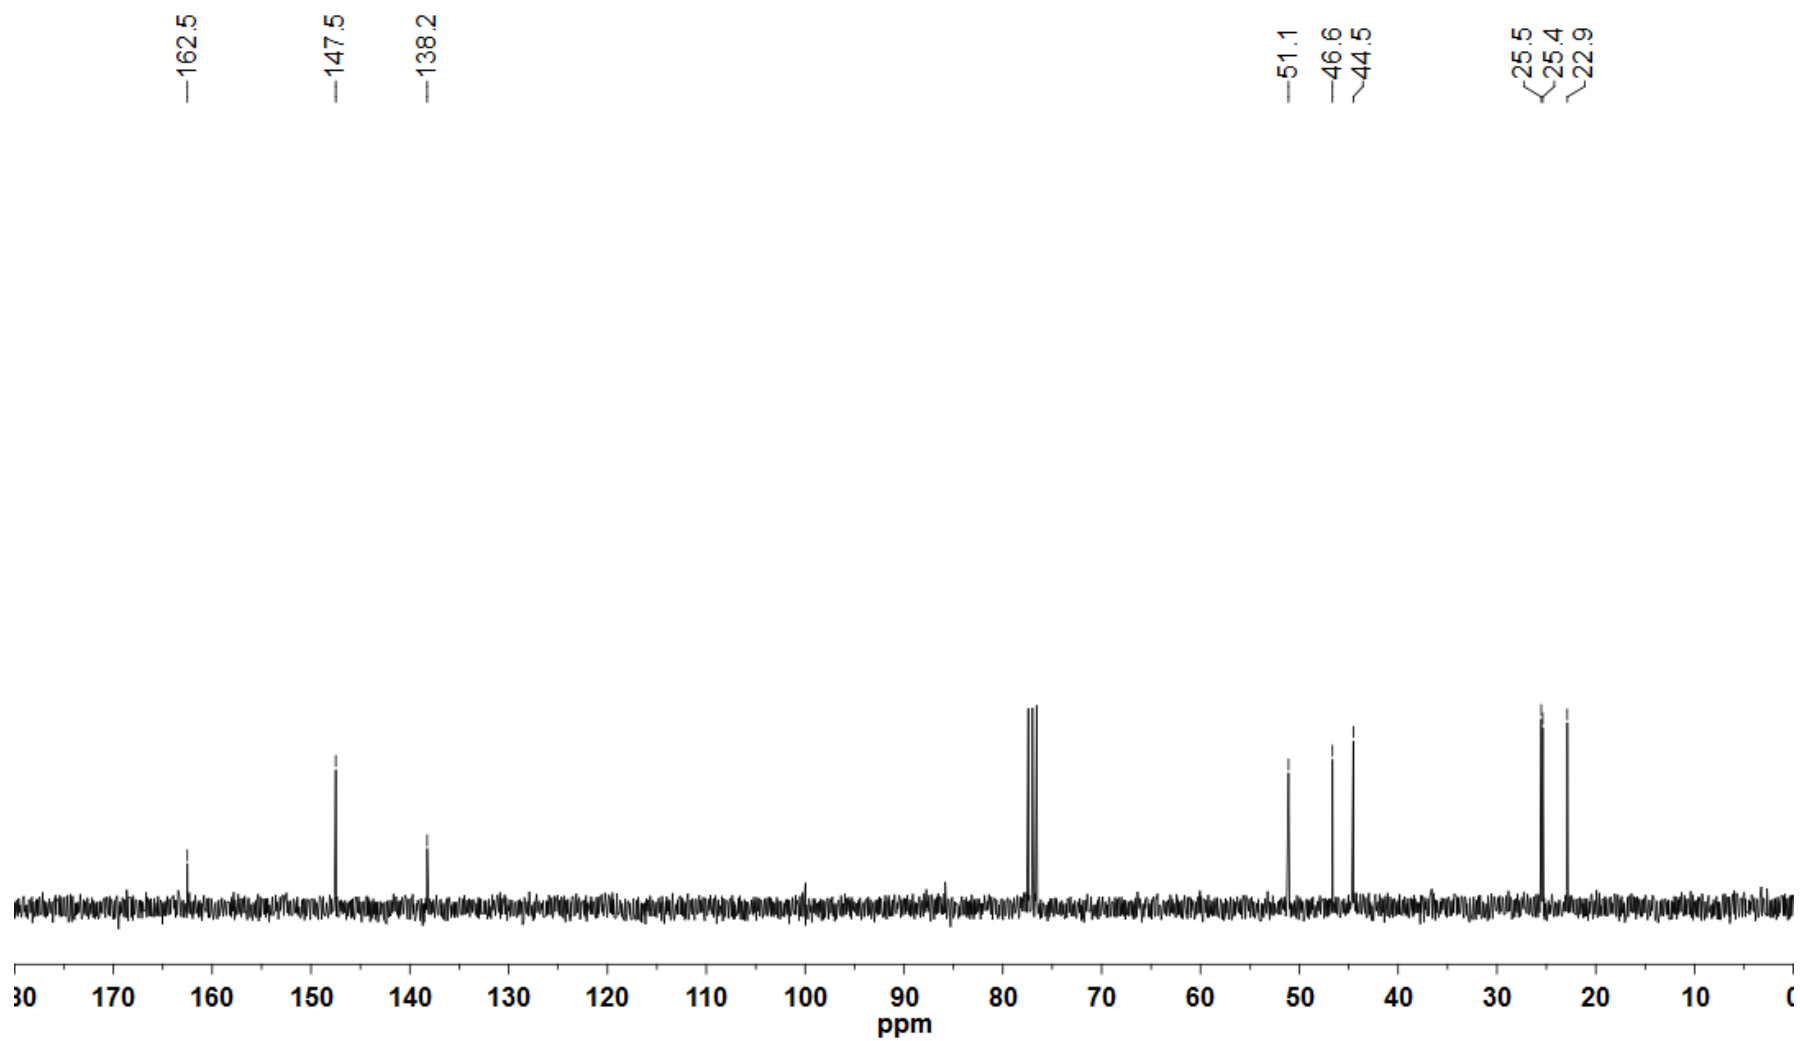

Figure S5.  $^{13}\text{C}$  NMR spectrum of **3** in  $\text{CDCl}_3$ .

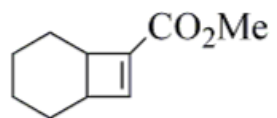

**Compound 4**

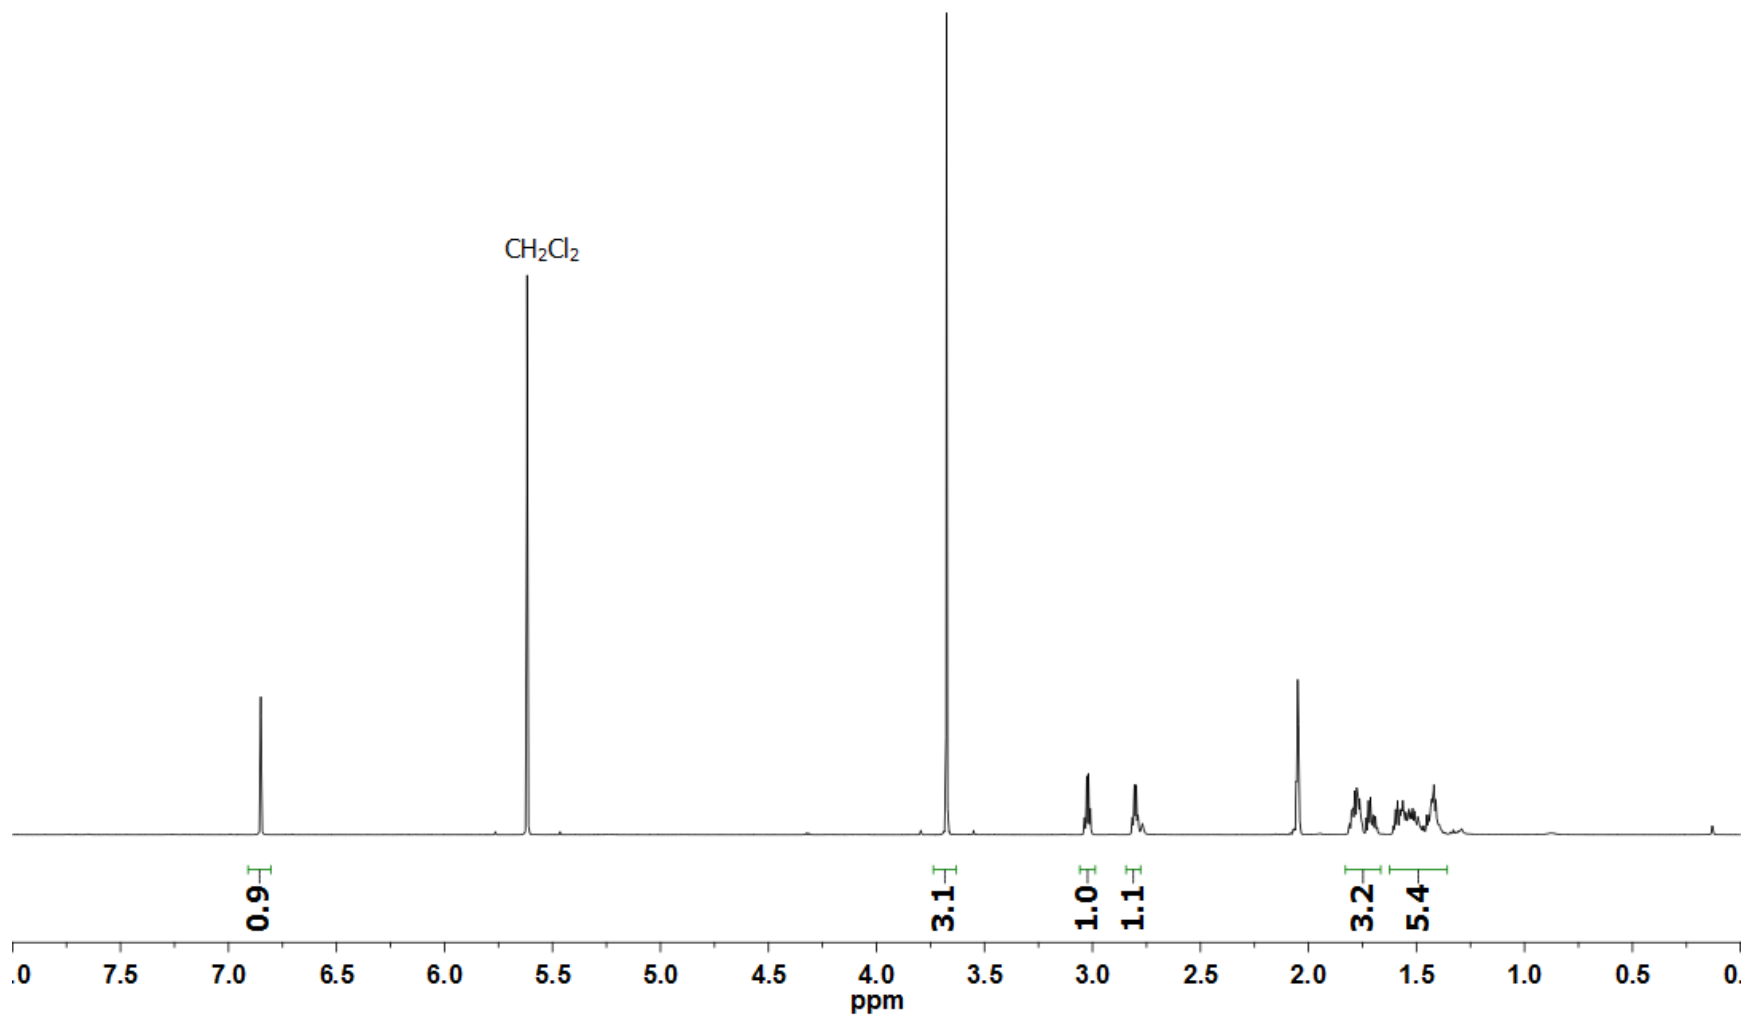

Figure S6.  $^1\text{H}$  NMR spectrum of **4** in acetone- $\text{d}_6$ .

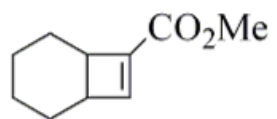

**Compound 4**

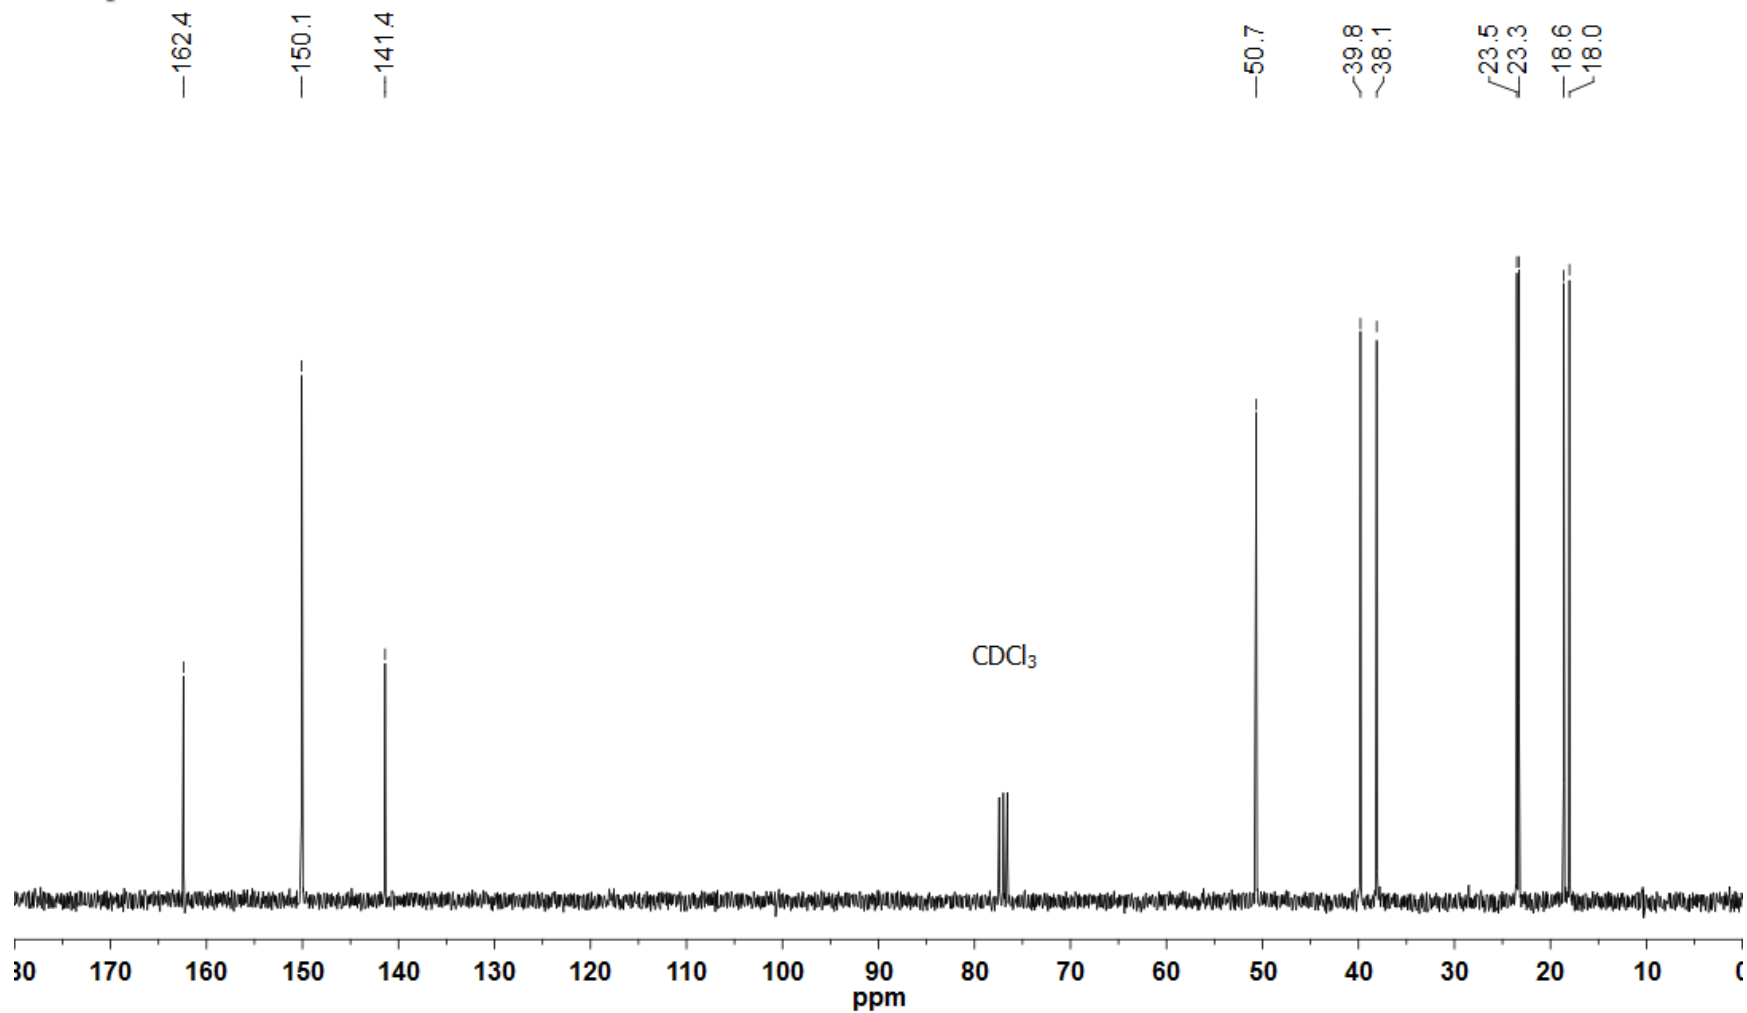

Figure S7. <sup>13</sup>C NMR spectrum of **4** in CDCl<sub>3</sub>.

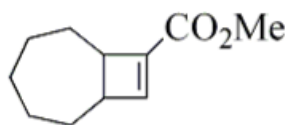

**Compound 5**

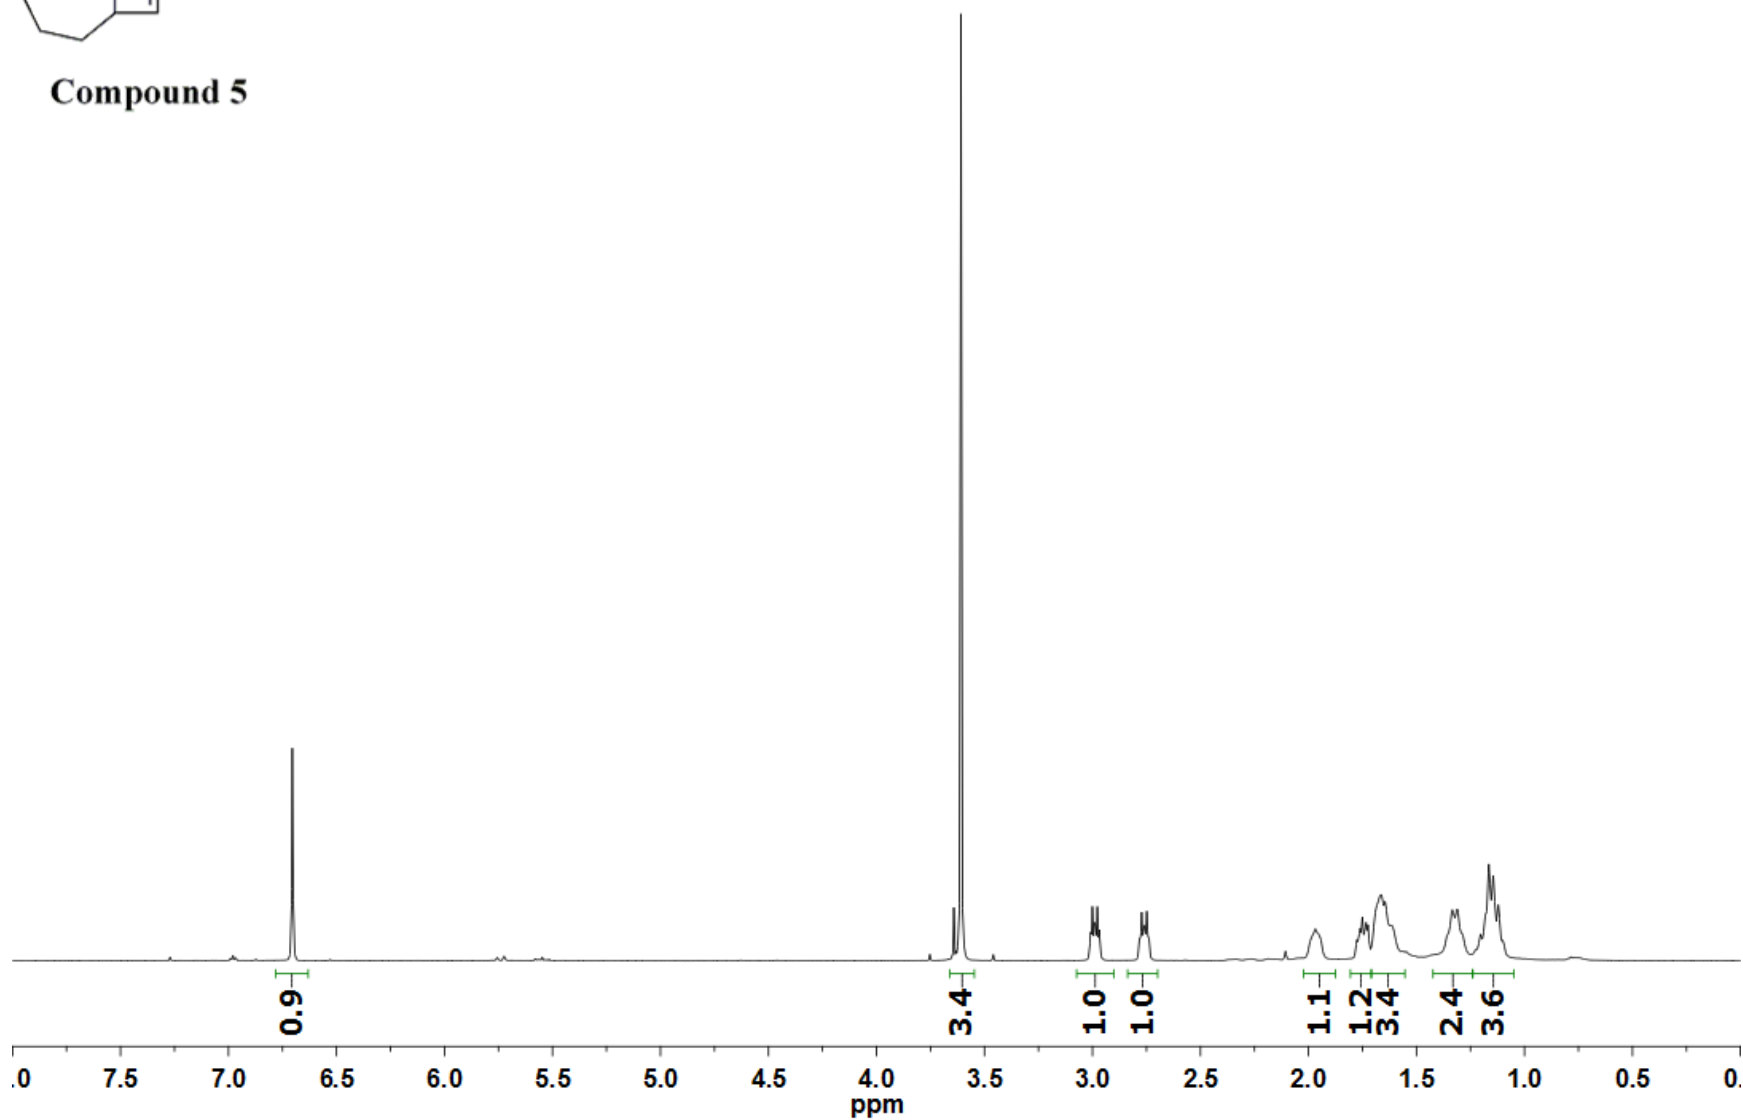

Figure S8. <sup>1</sup>H NMR spectrum of **5** in CDCl<sub>3</sub>.

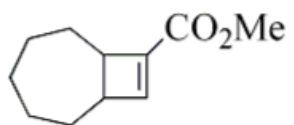

**Compound 5**

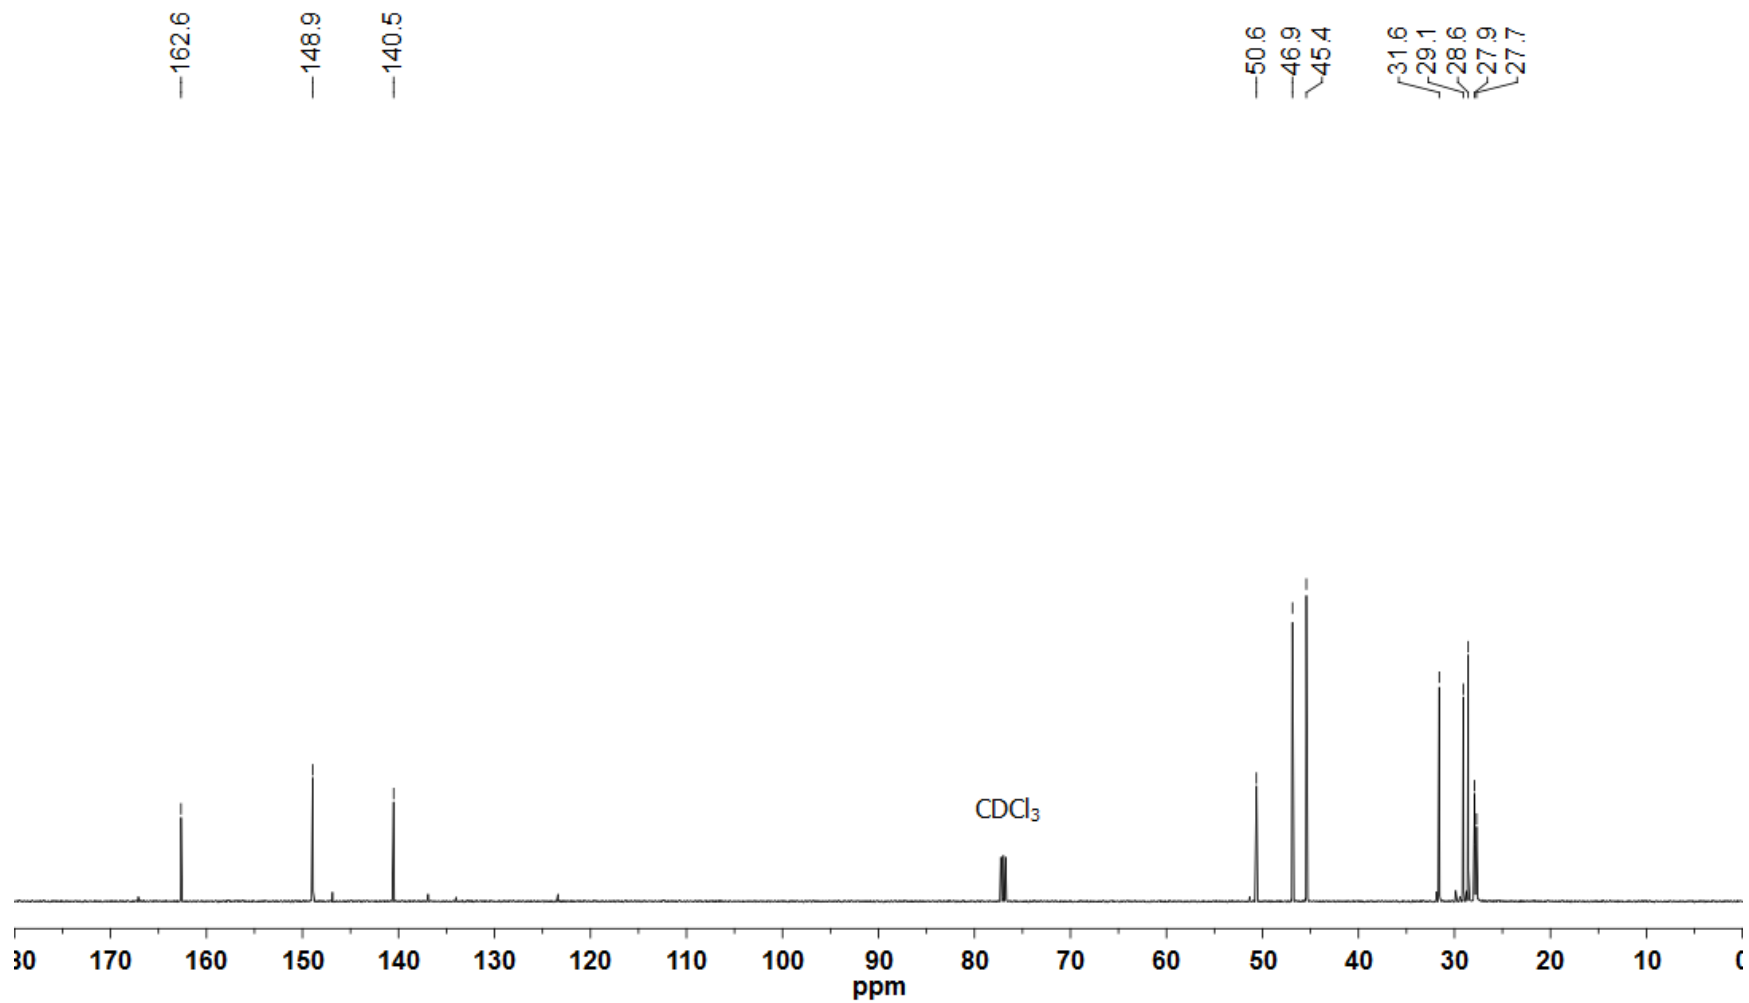

Figure S9. <sup>13</sup>C NMR spectrum of **5** in CDCl<sub>3</sub>.

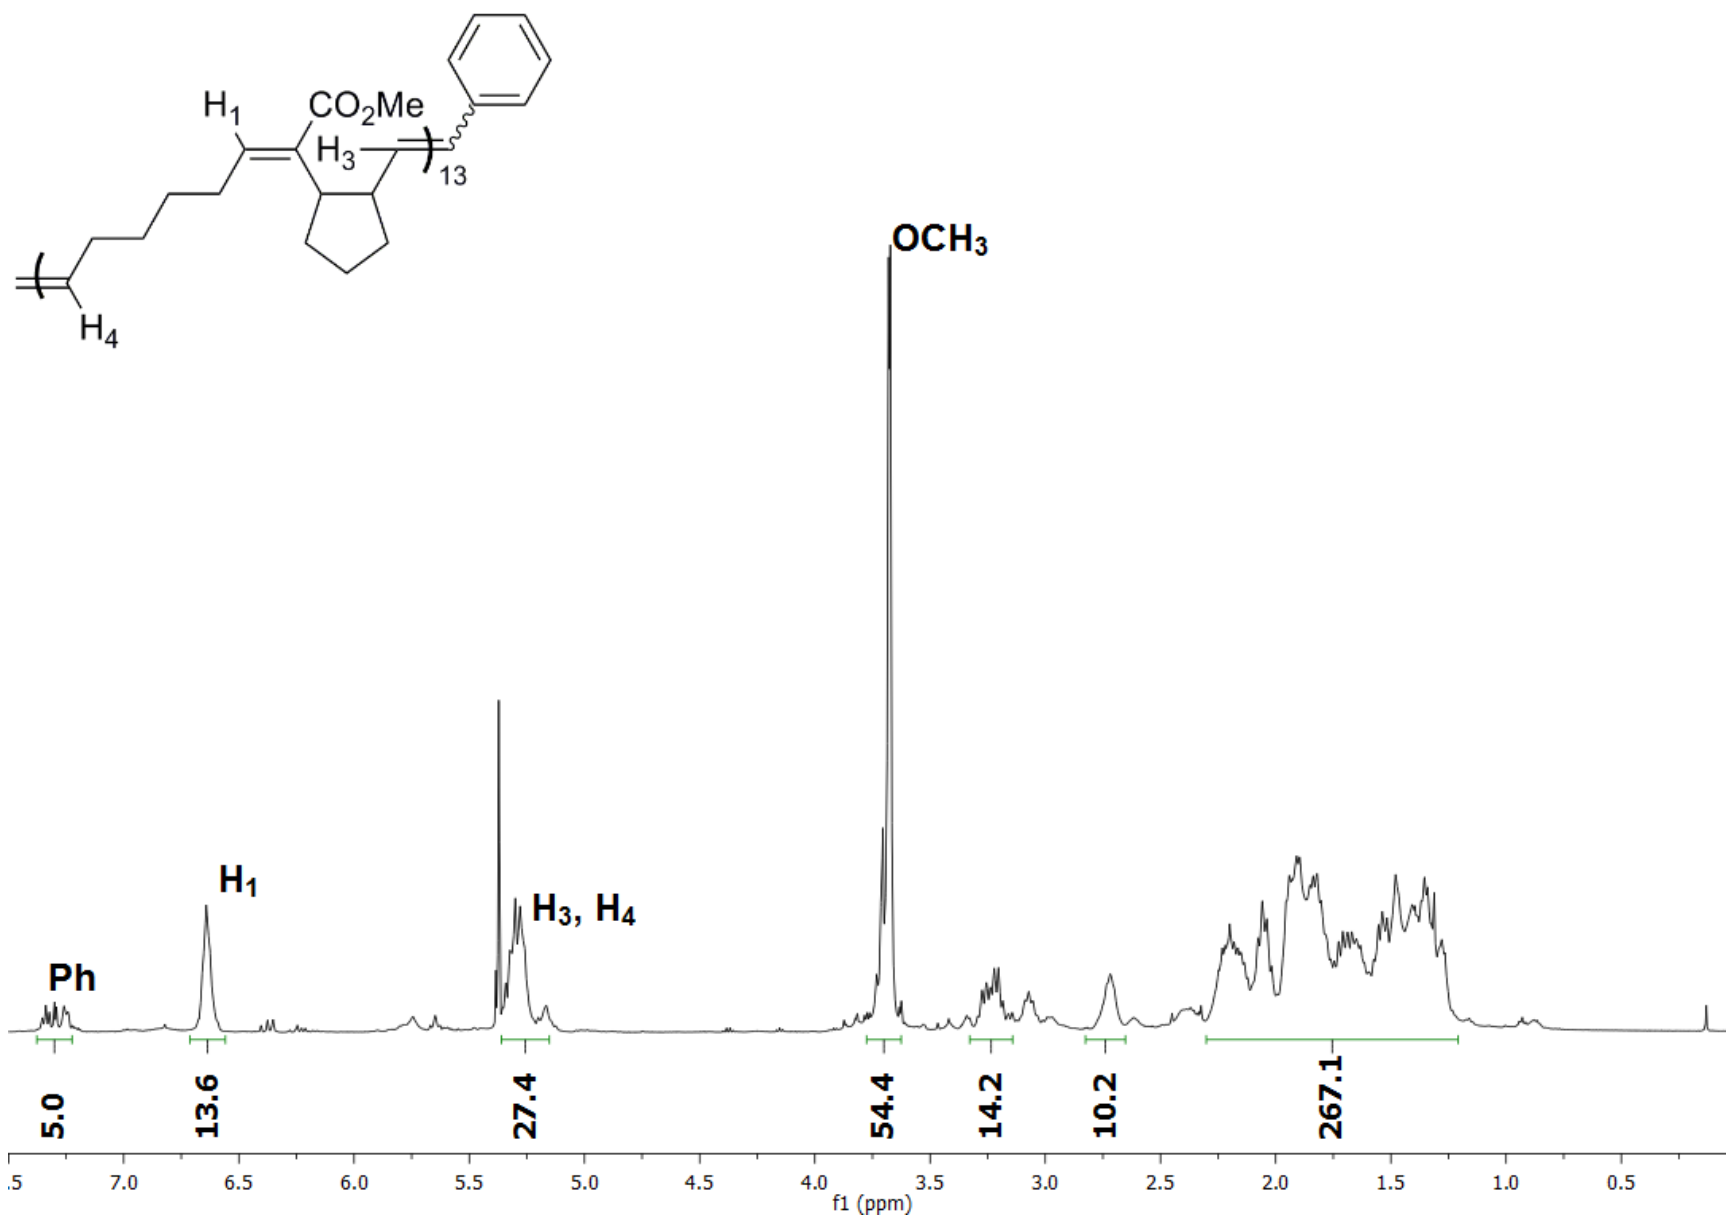

Figure S10. <sup>1</sup>H NMR spectrum of poly(3-*alt*-6)<sub>13</sub> in CD<sub>2</sub>Cl<sub>2</sub>.

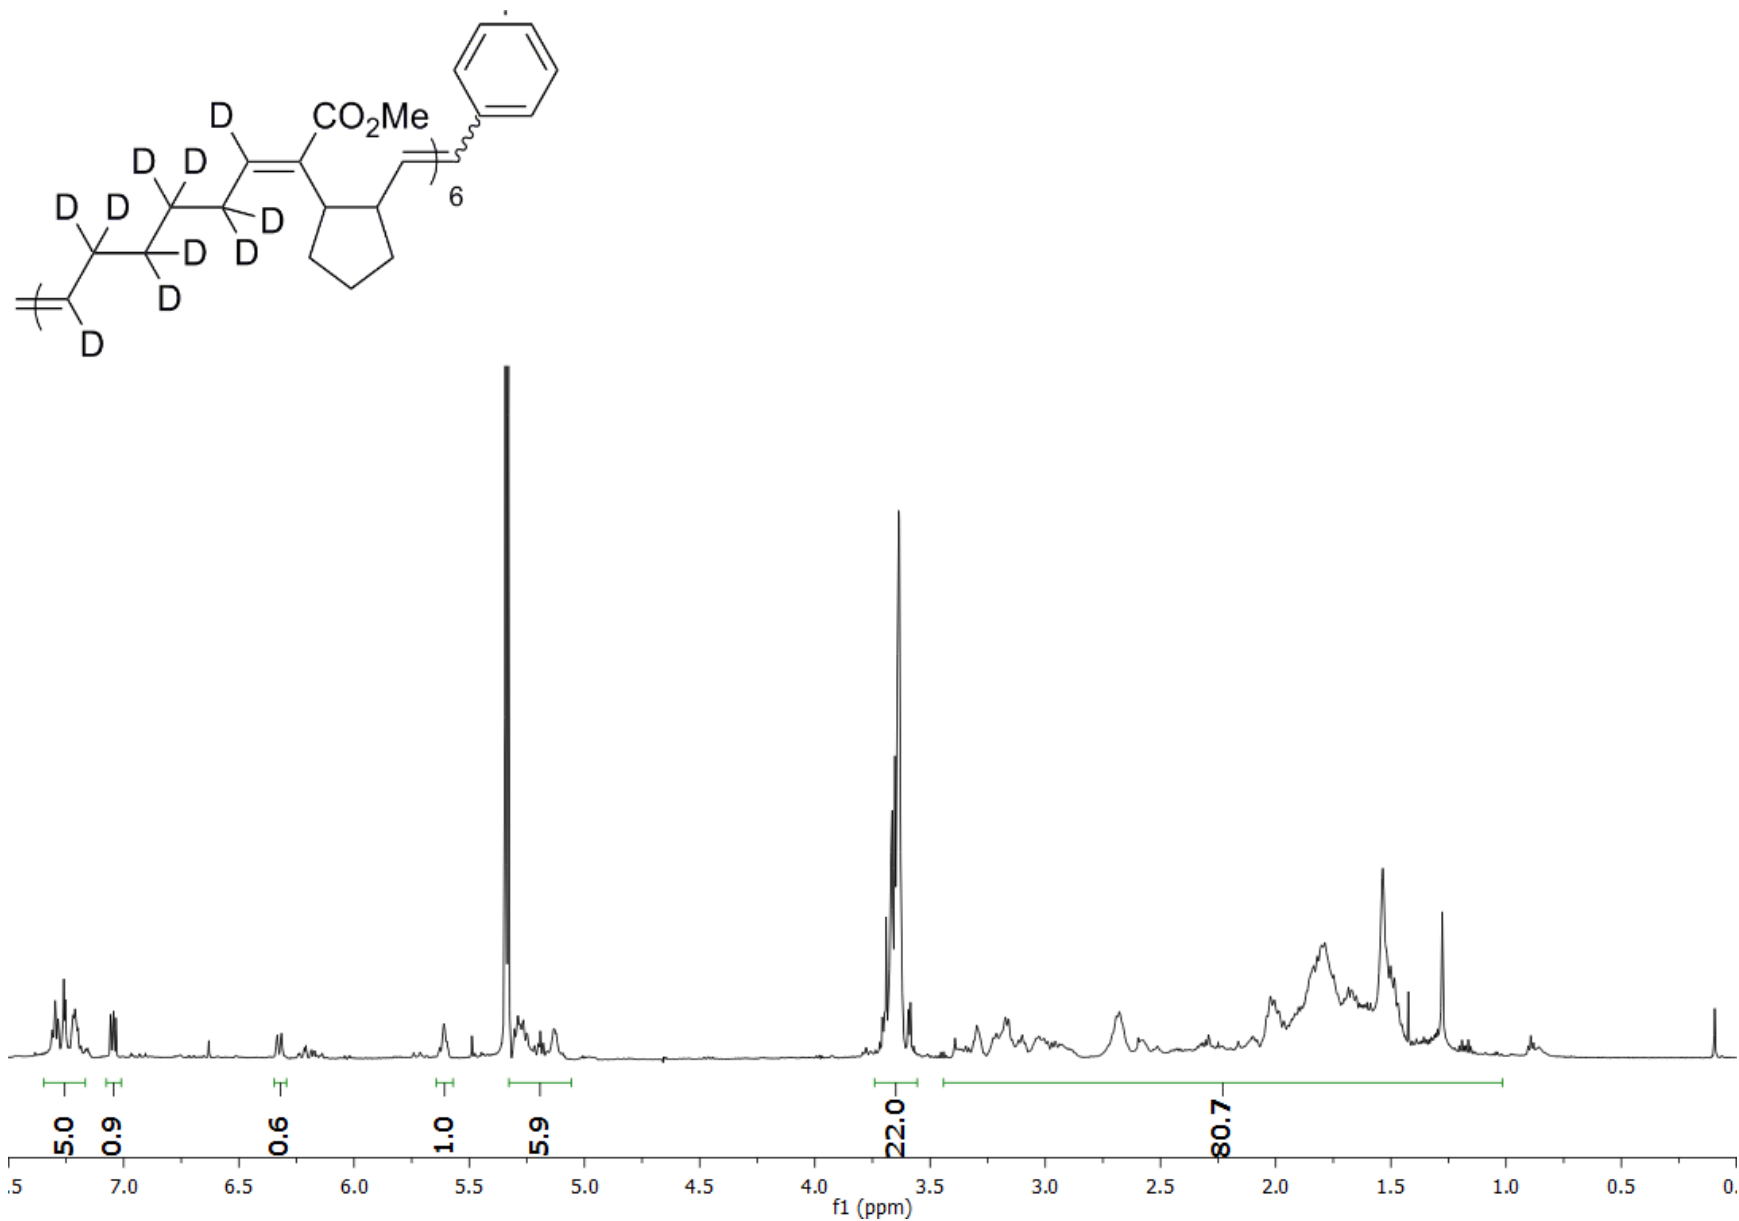

Figure S11. <sup>1</sup>H NMR spectrum of poly(3-*alt*-6-**d**<sub>10</sub>)<sub>6</sub> in CD<sub>2</sub>Cl<sub>2</sub>.



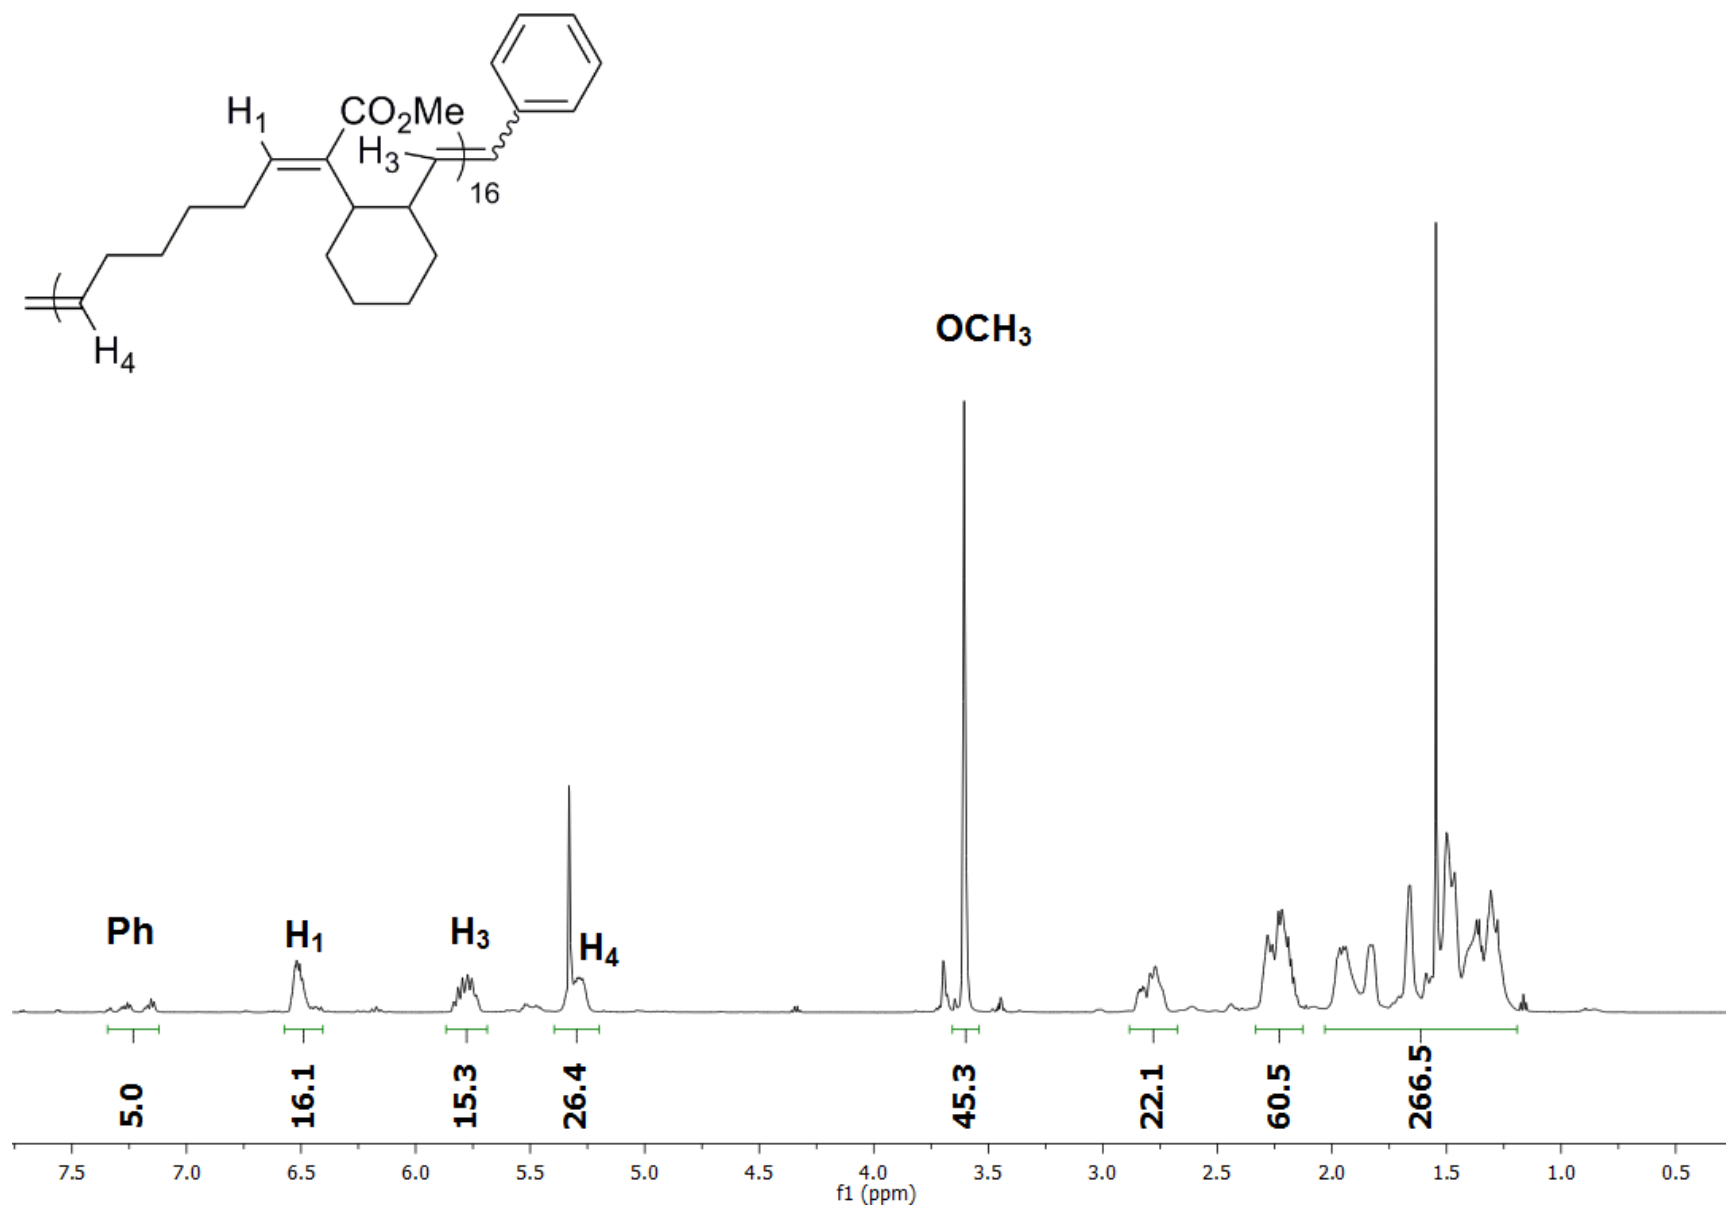

Figure S12. <sup>1</sup>H NMR spectrum of poly(4-alt-6)<sub>16</sub> obtained at 25 °C in CD<sub>2</sub>Cl<sub>2</sub>.

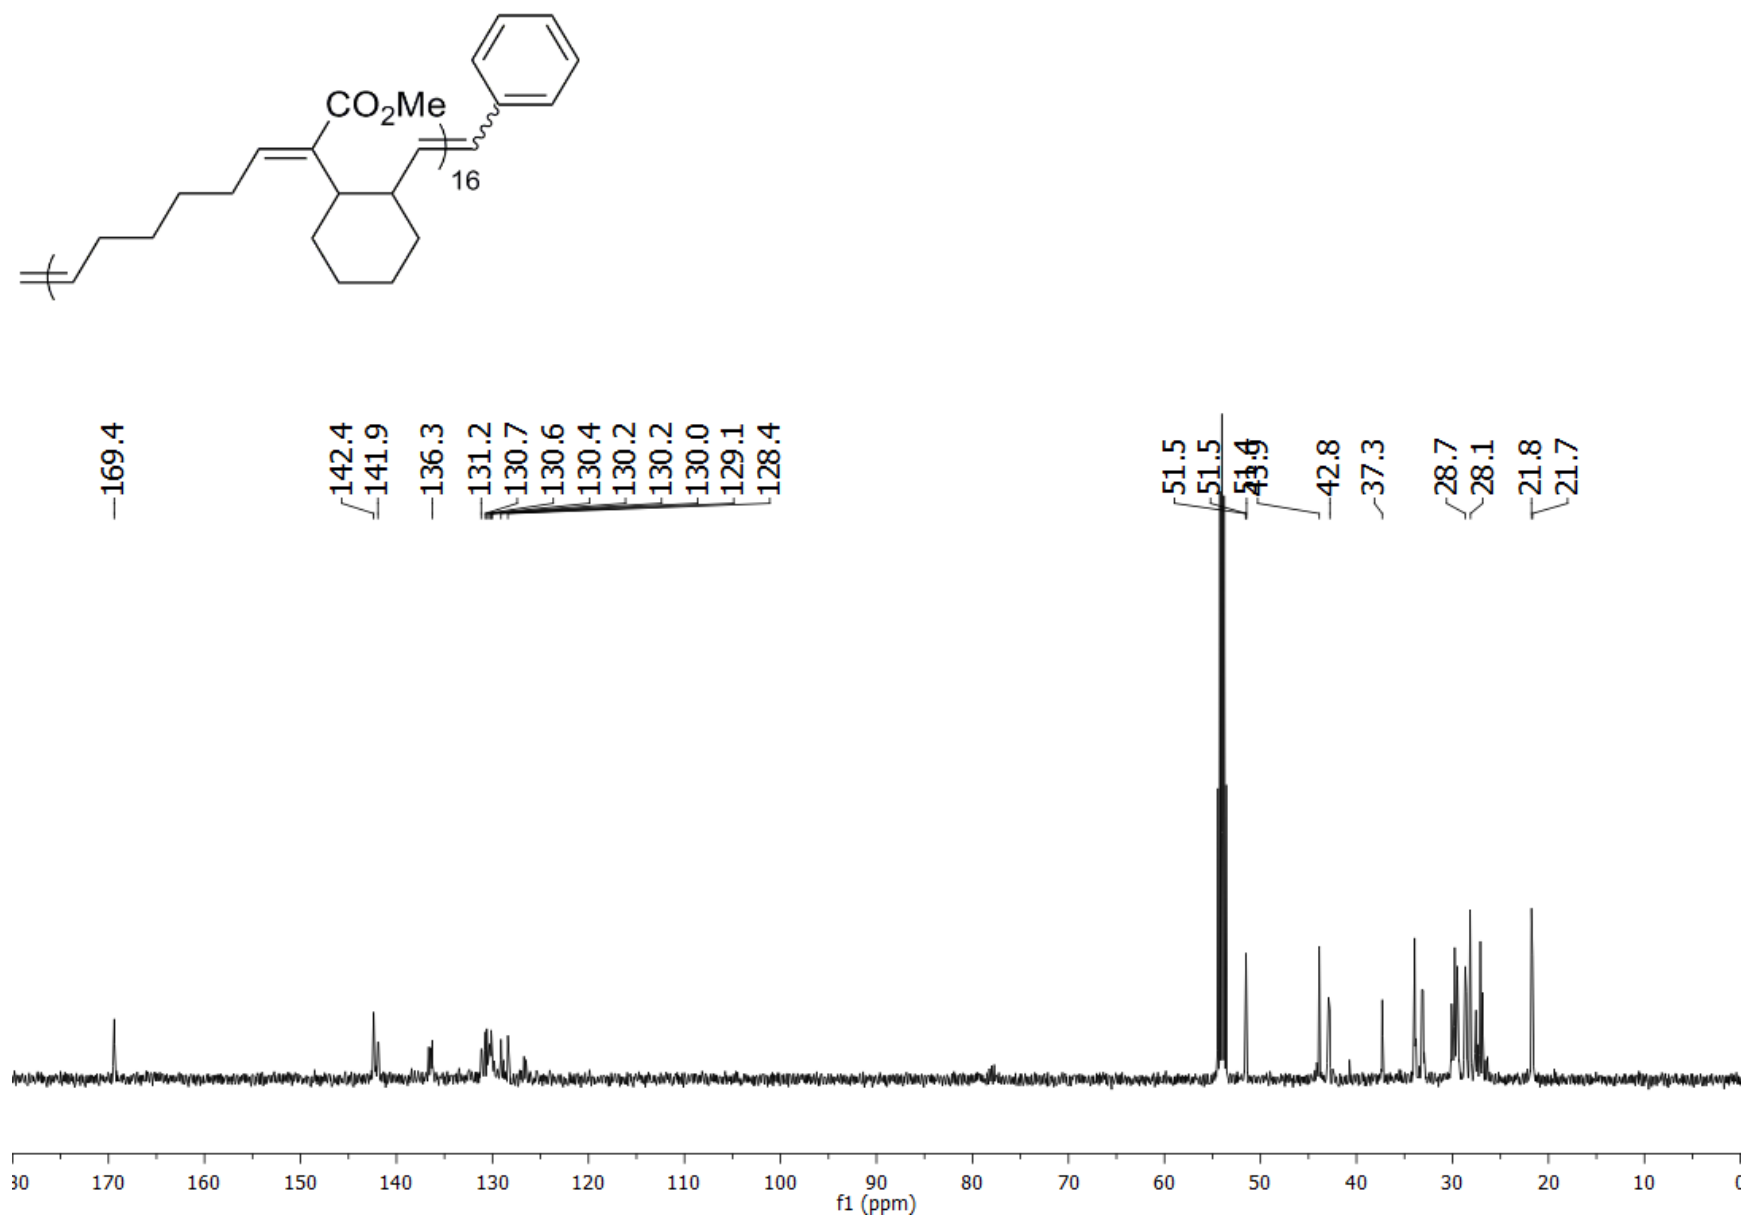

Figure S13.  $^{13}\text{C}$  NMR spectrum of poly(4-*alt*-6)<sub>16</sub> obtained at 25 °C in CD<sub>2</sub>Cl<sub>2</sub>.

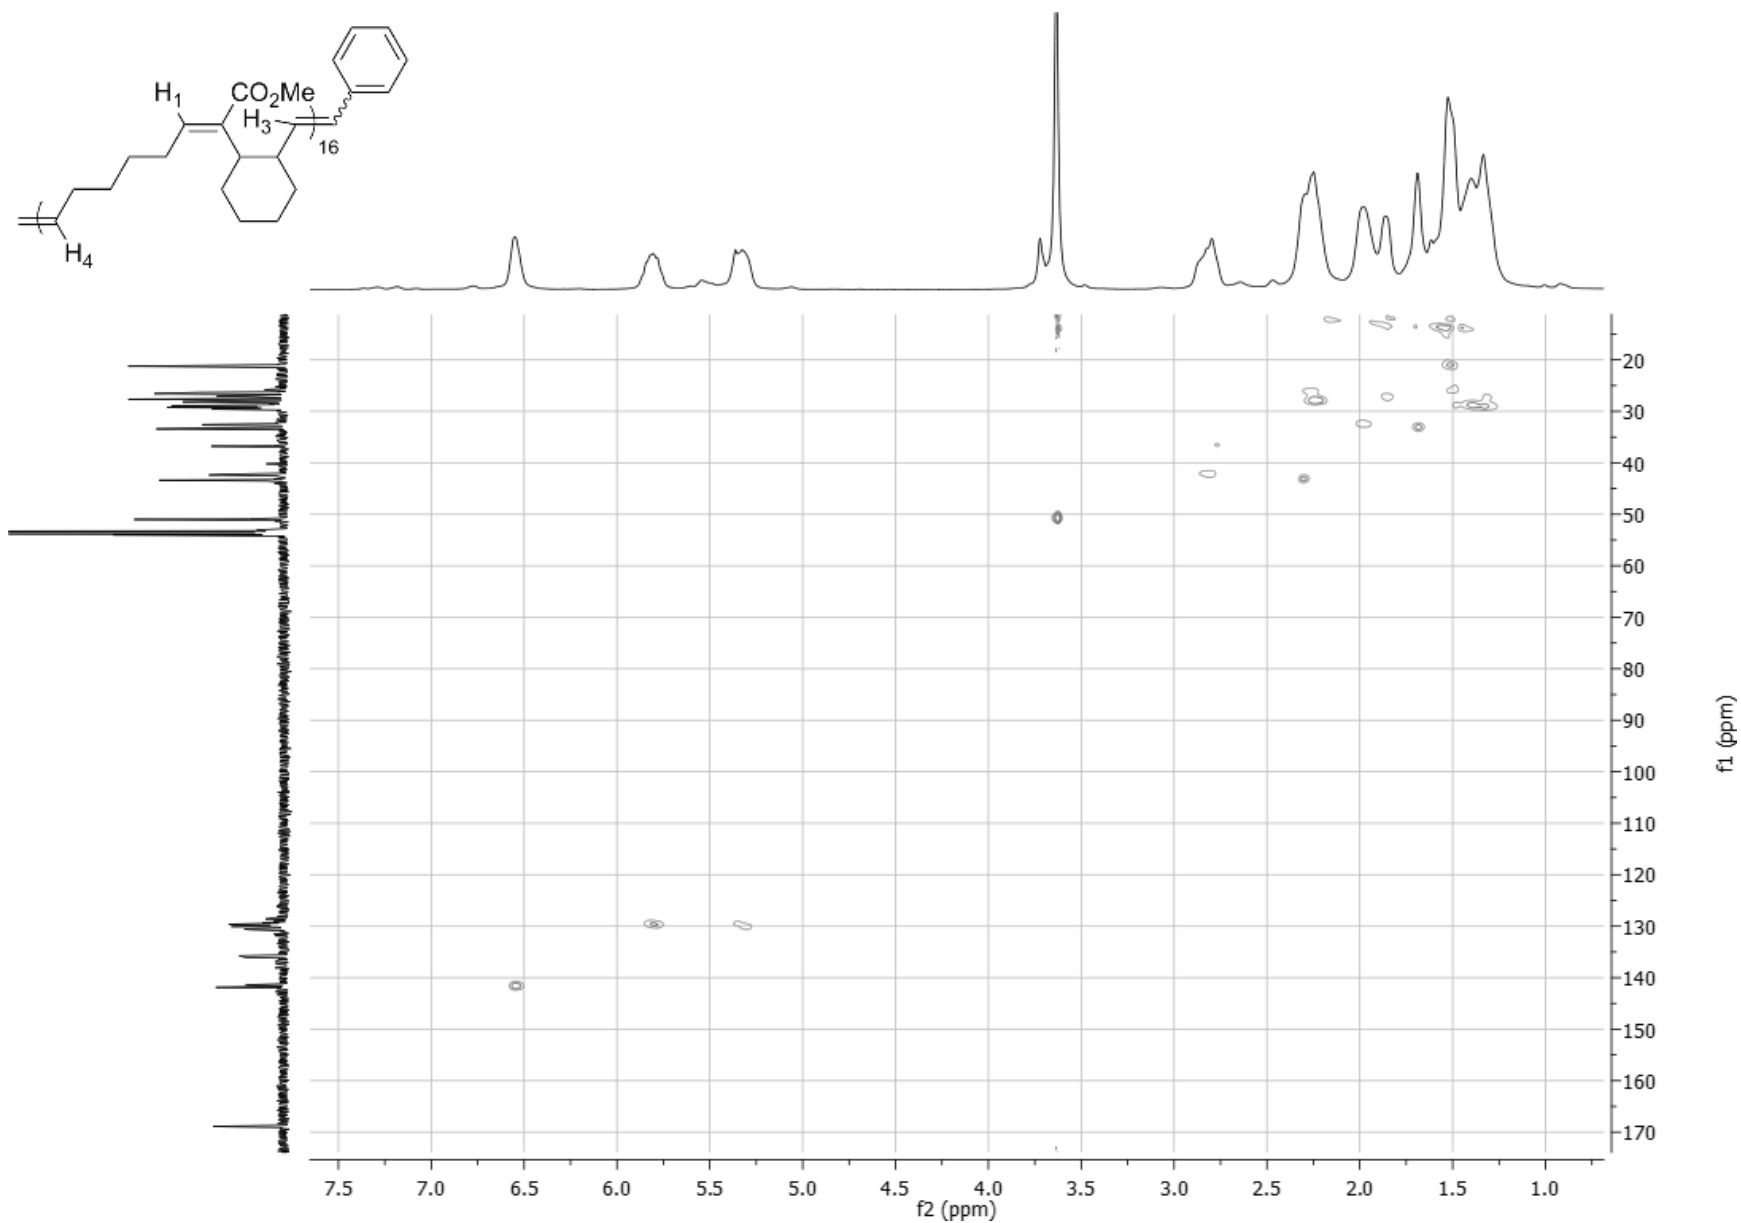

Figure S14. HSQC spectrum of poly(4-*alt*-6)<sub>16</sub> obtained at 25 °C in CD<sub>2</sub>Cl<sub>2</sub>.

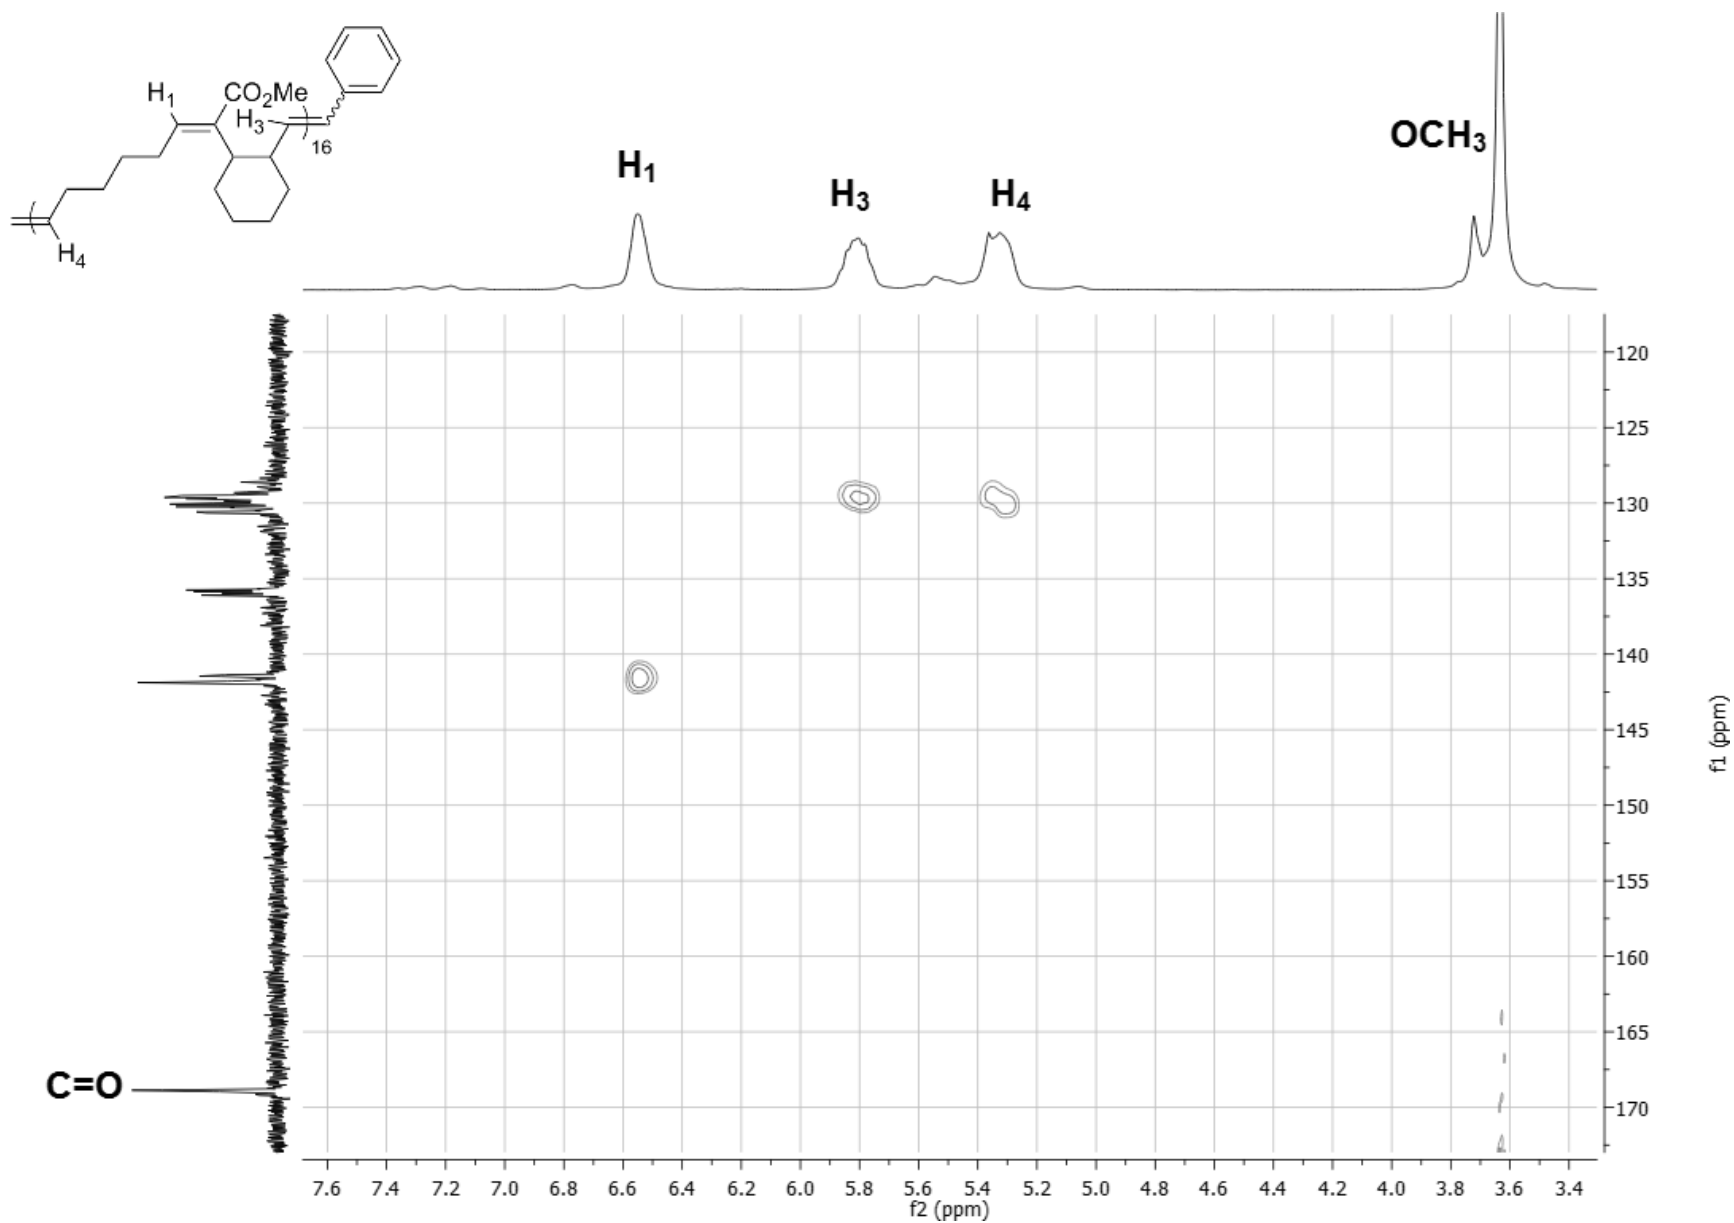

Figure S15. Alkene region of HSQC spectrum of poly(4-*alt*-6)<sub>16</sub> obtained at 25 °C in CD<sub>2</sub>Cl<sub>2</sub>.

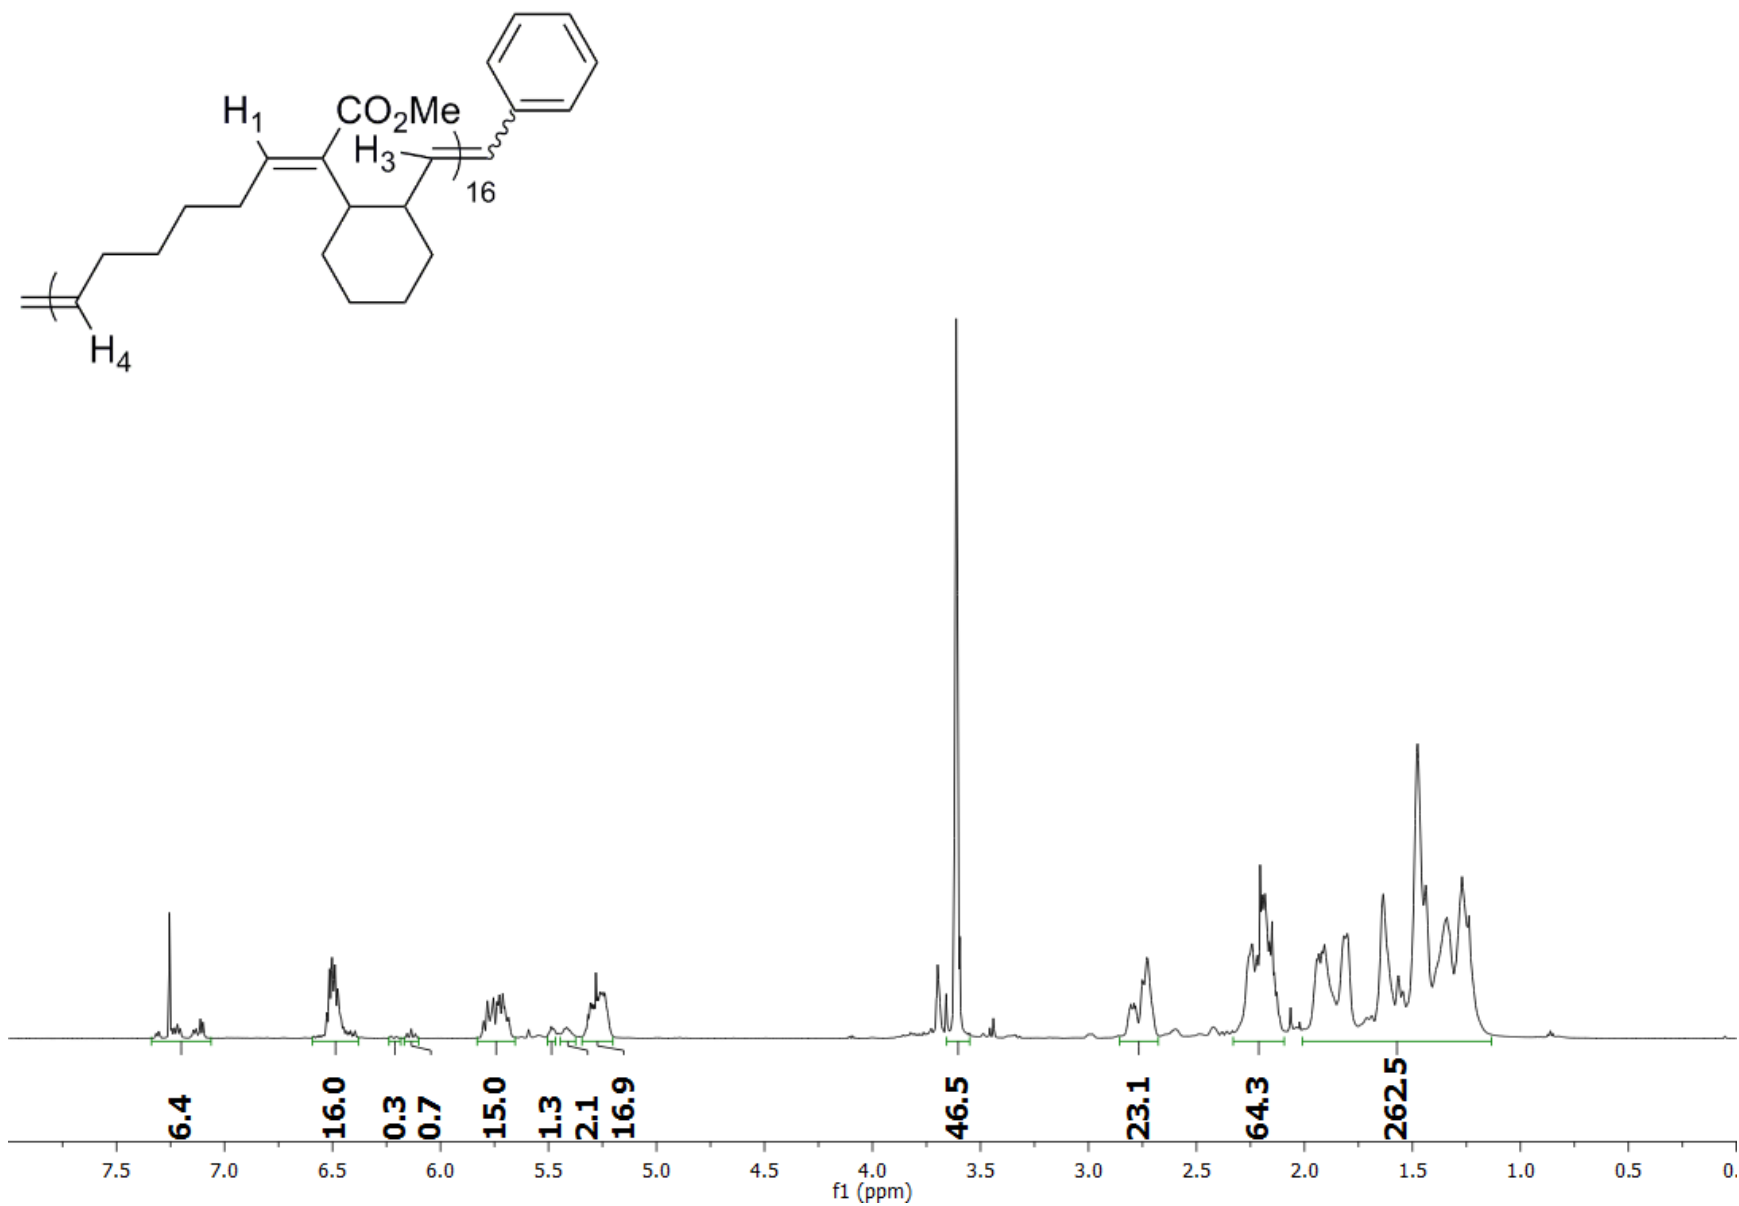

Figure S16. <sup>1</sup>H NMR spectrum of poly(4-*alt*-6)<sub>16</sub> obtained at 35 °C in CDCl<sub>3</sub>.

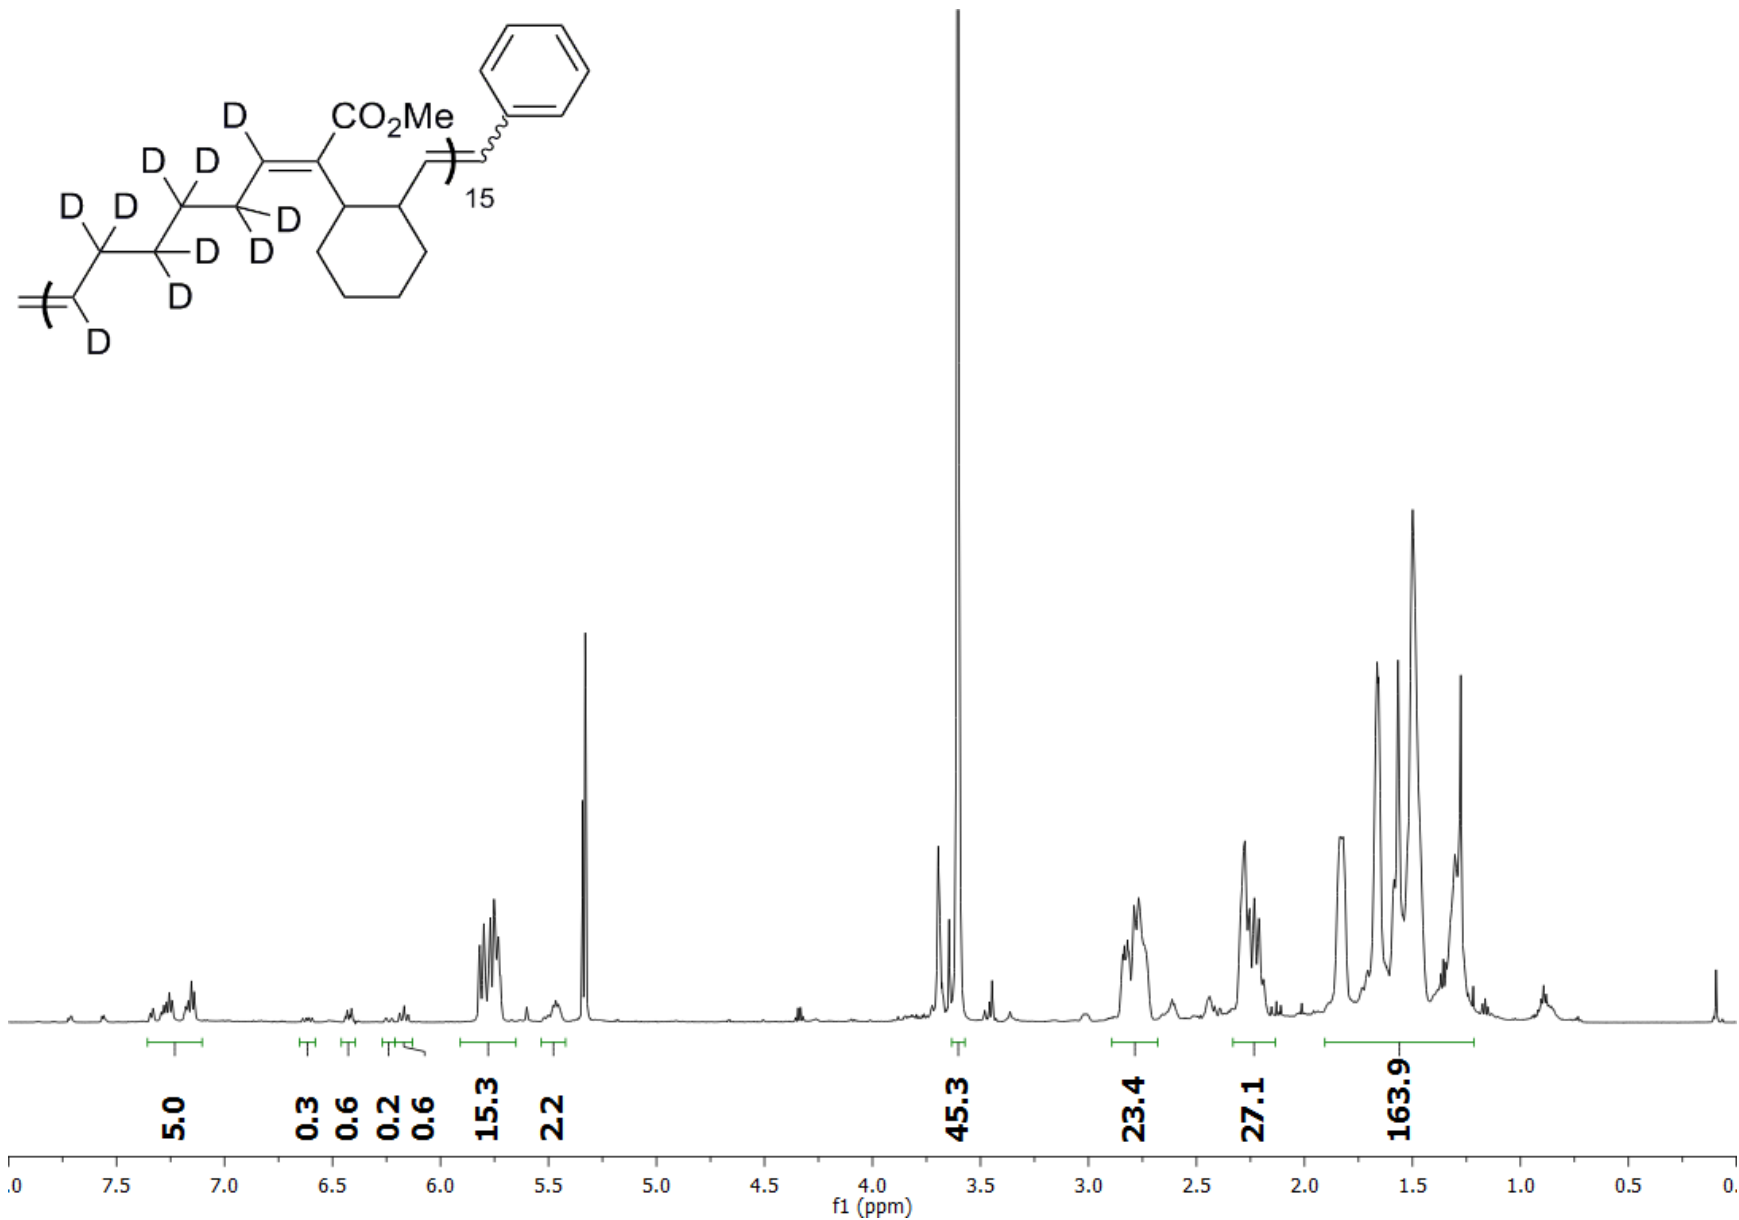

Figure S17.  $^1\text{H}$  NMR spectrum of  $\text{poly}(4\text{-alt-6-}d_{10})_{15}$  in  $\text{CD}_2\text{Cl}_2$ .

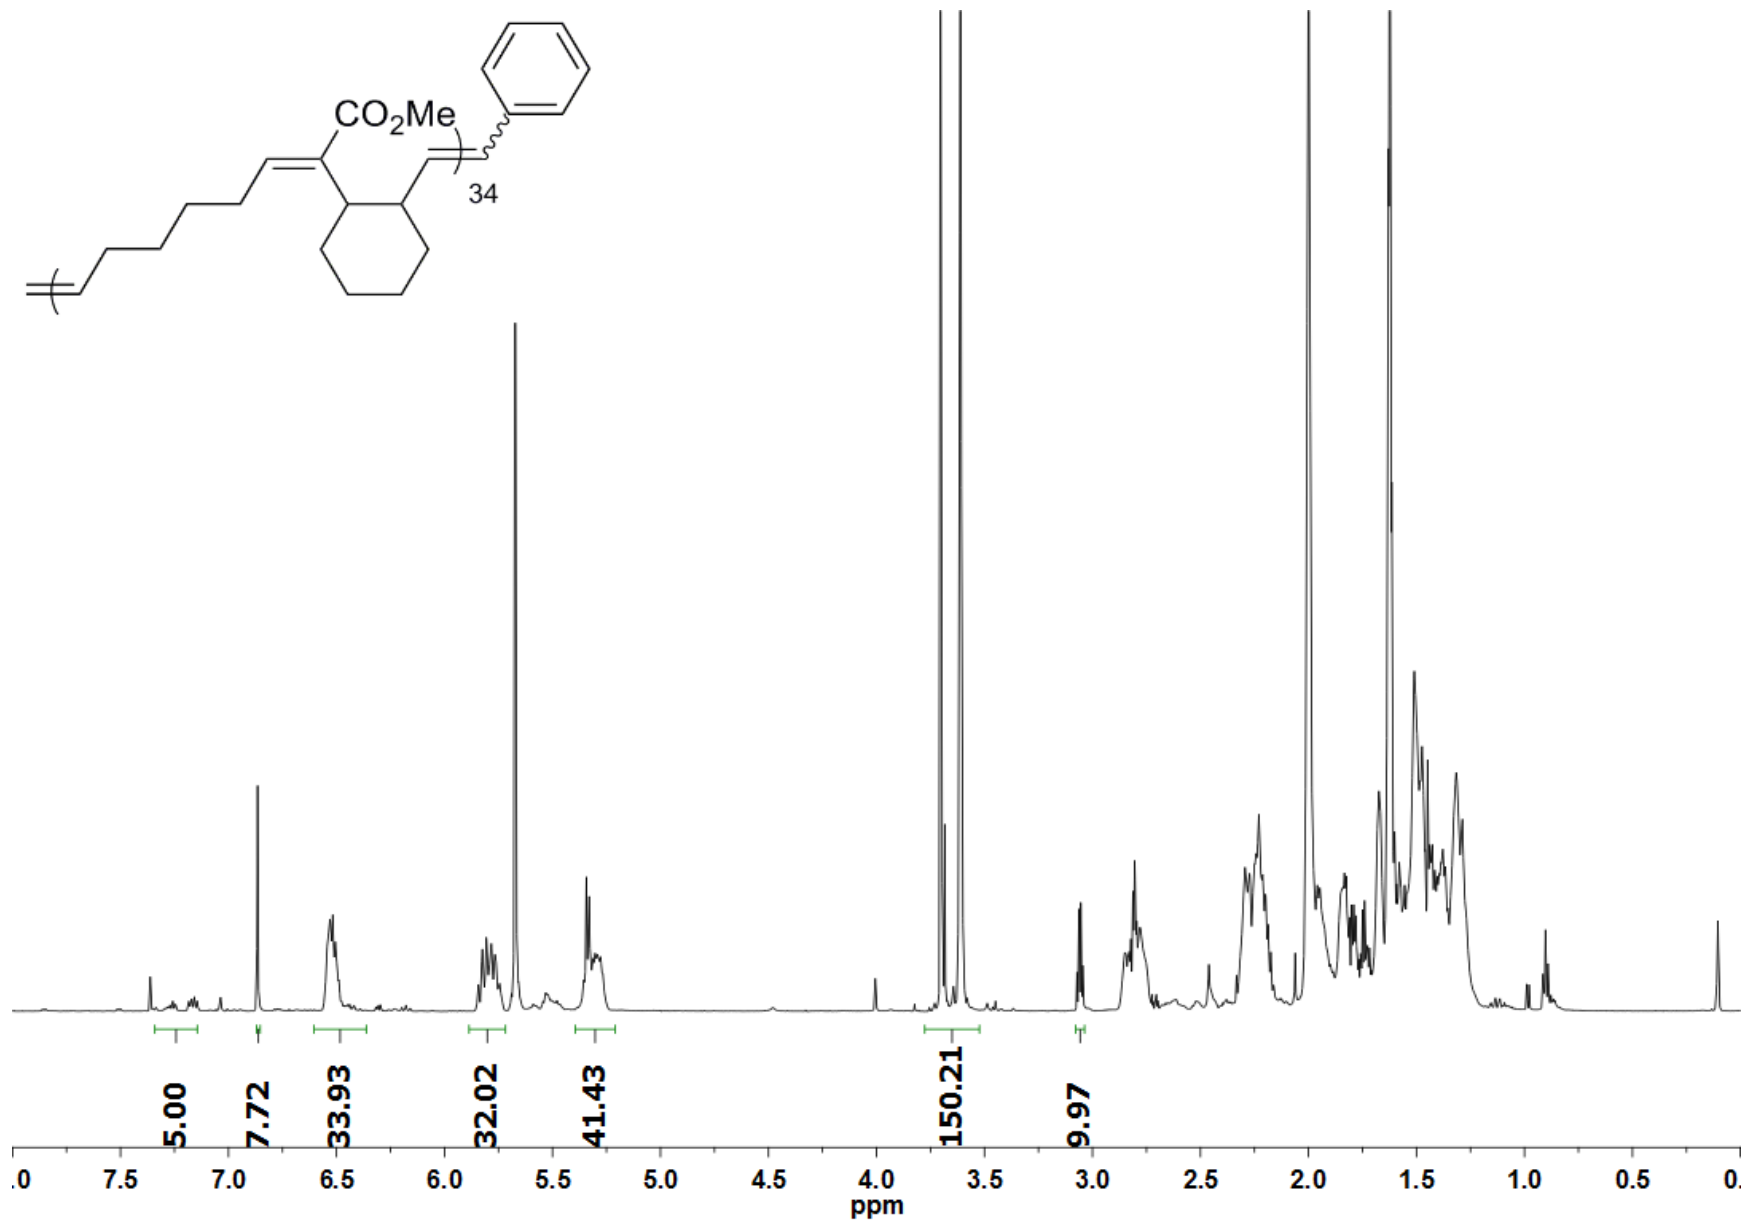

Figure S18. <sup>1</sup>H NMR spectrum of crude poly(4-*alt*-6)<sub>34</sub> obtained at 35 °C in CD<sub>2</sub>Cl<sub>2</sub>.

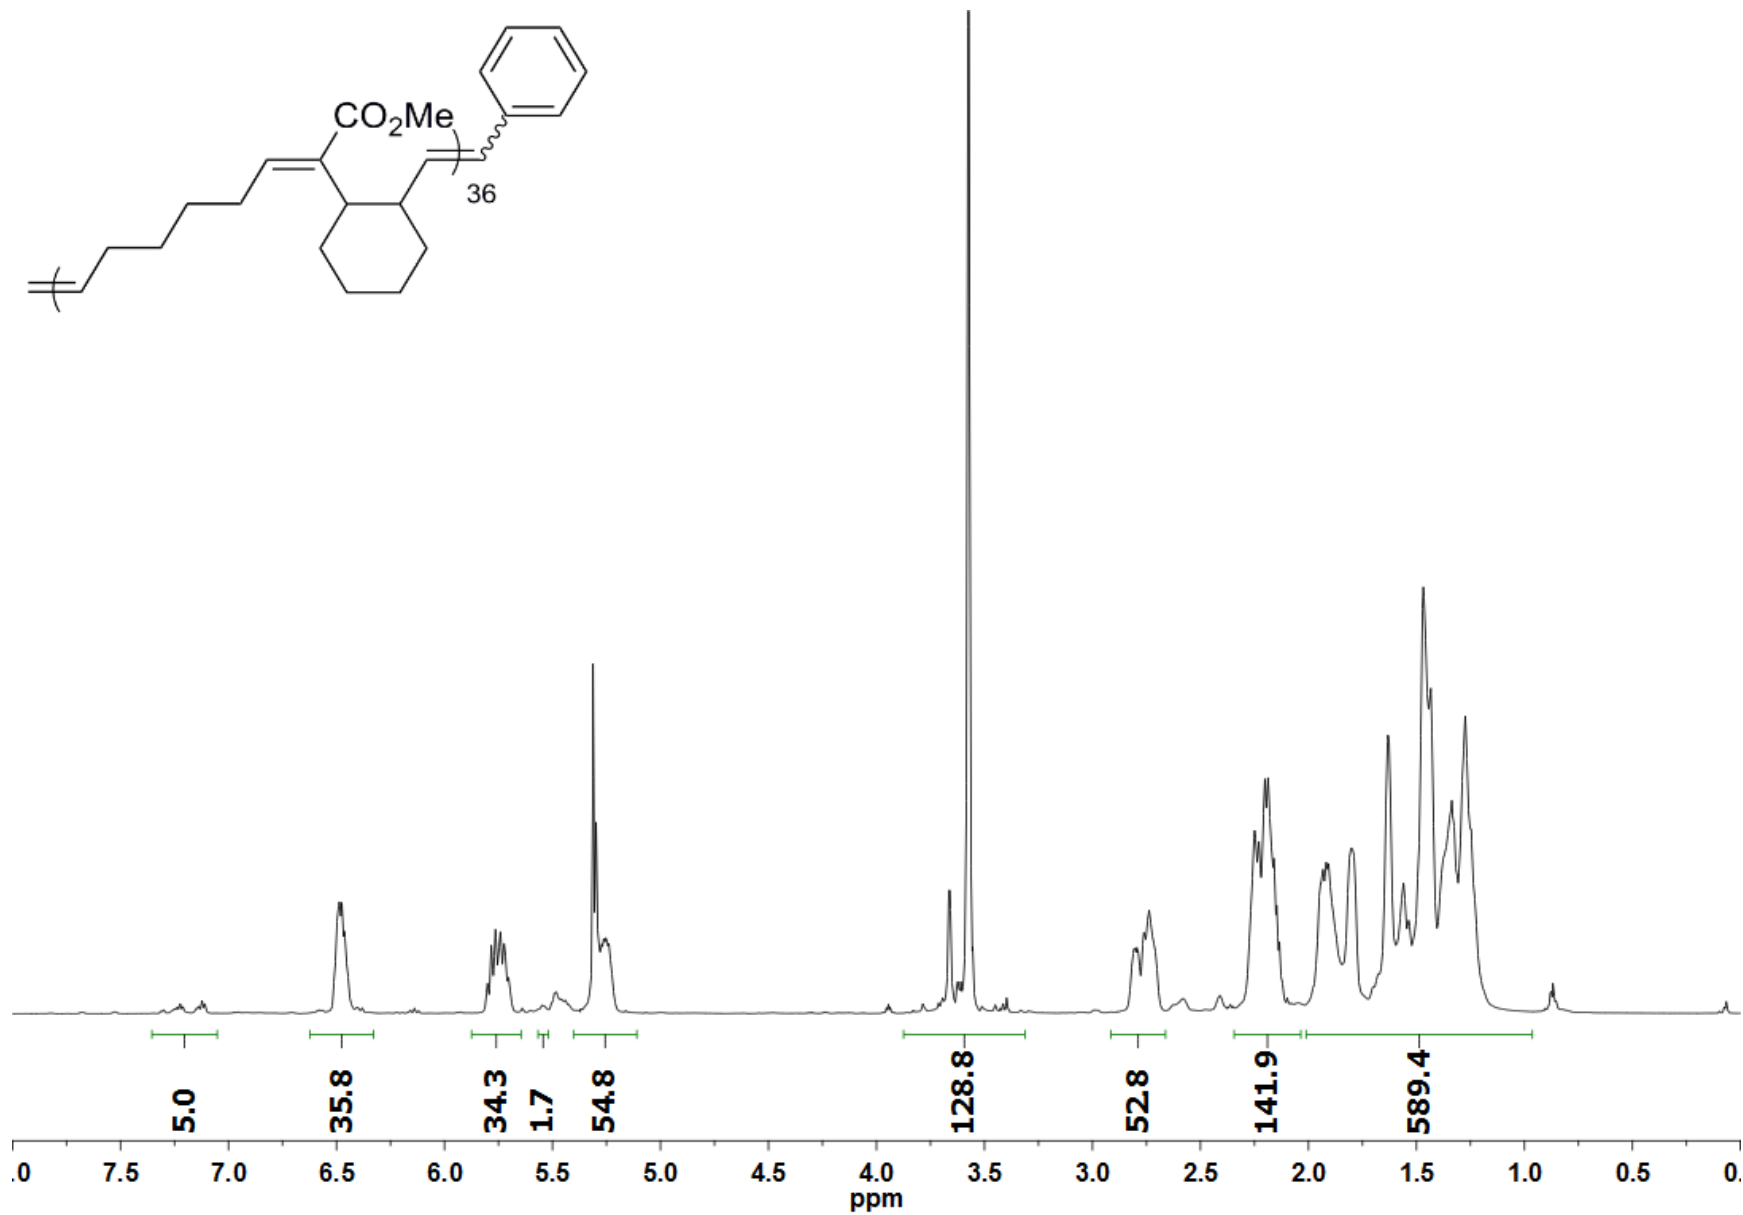

Figure S19. <sup>1</sup>H NMR spectrum of poly(4-*alt*-6)<sub>36</sub> obtained at 60 °C in CD<sub>2</sub>Cl<sub>2</sub>.



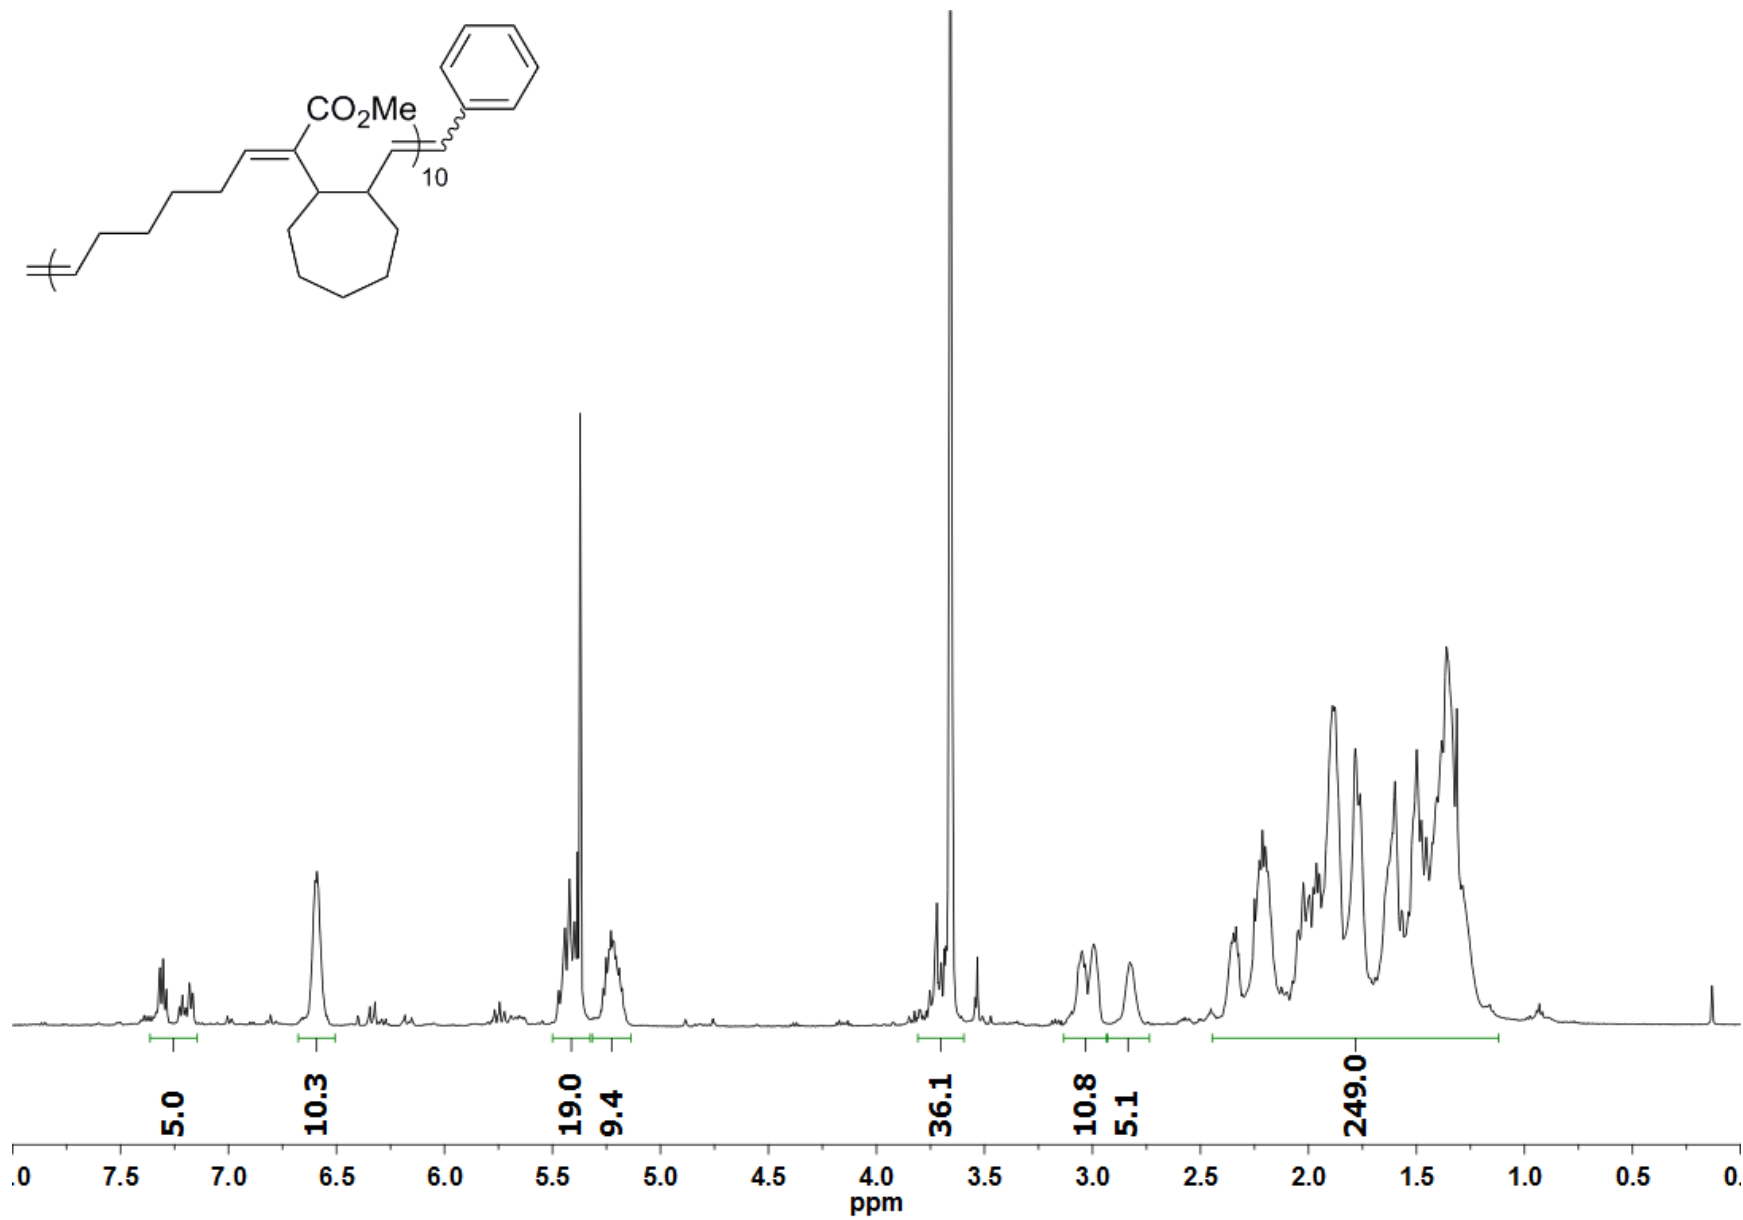

Figure S20. <sup>1</sup>H NMR spectrum of poly(5-*alt*-6)<sub>10</sub> in CD<sub>2</sub>Cl<sub>2</sub>.

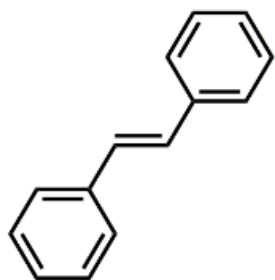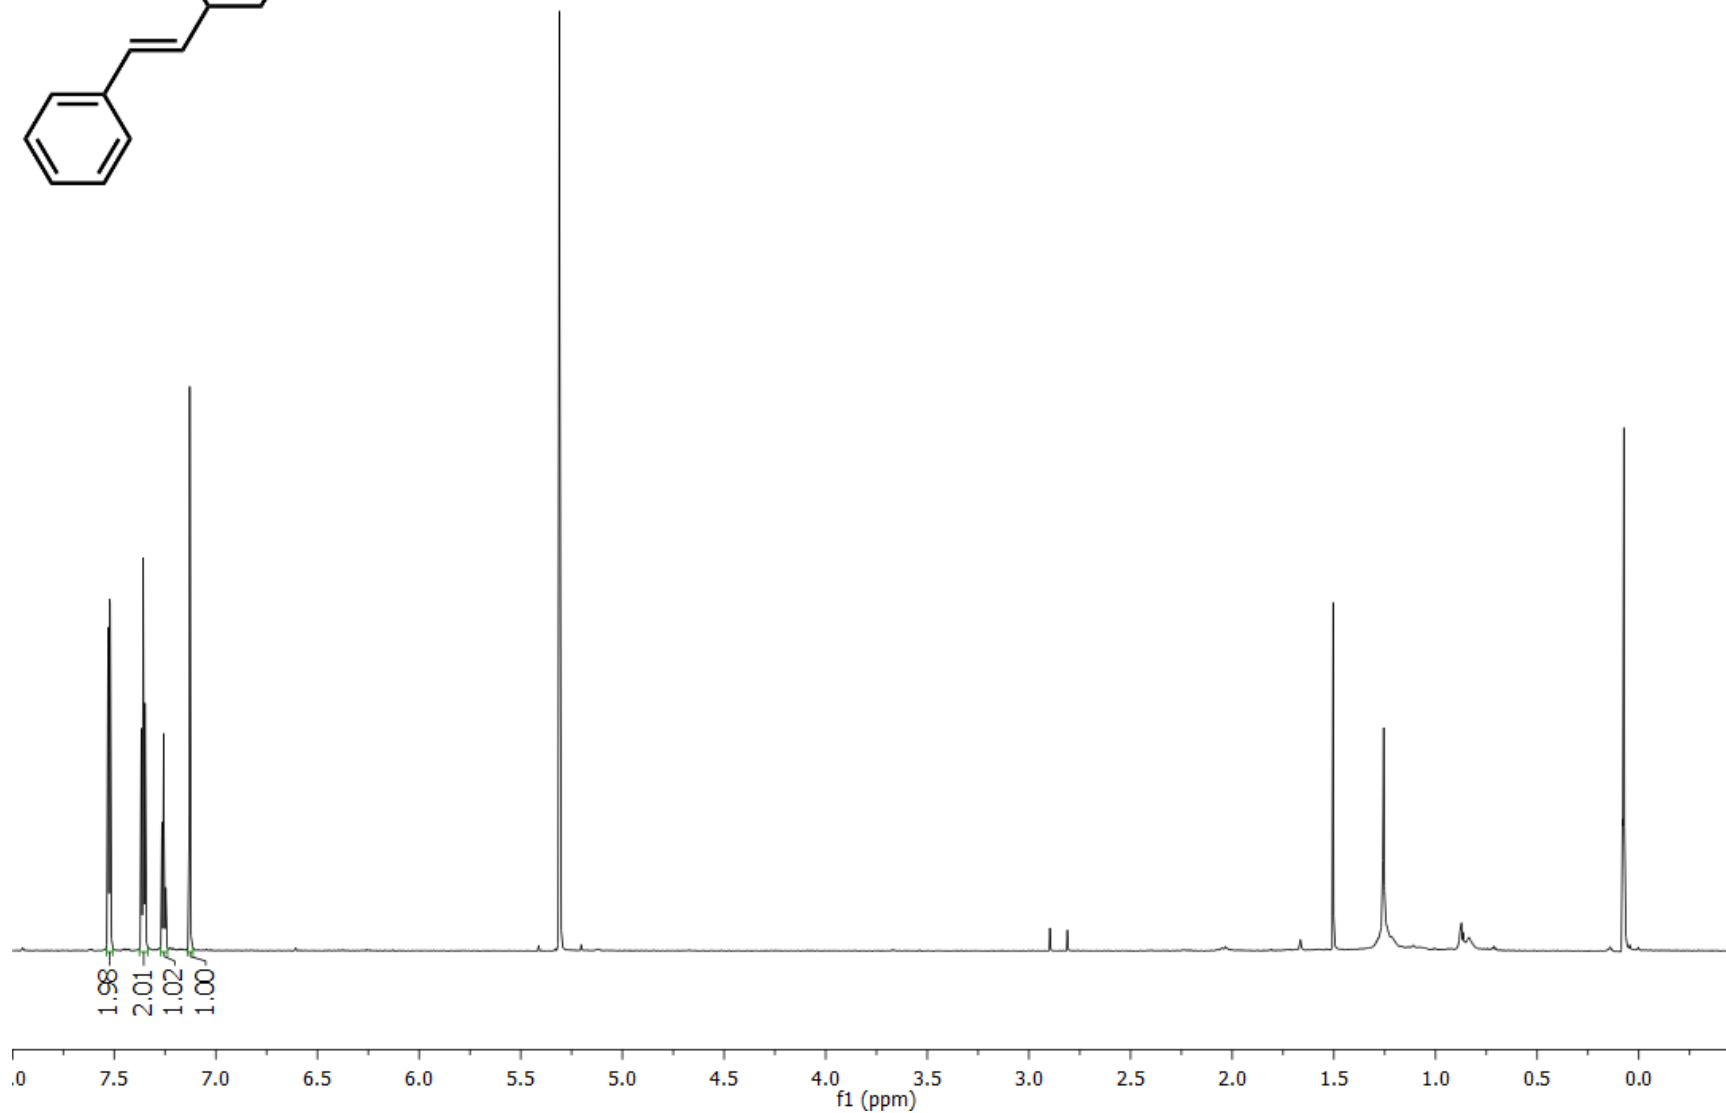

Figure S21.  $^1\text{H}$  NMR spectrum of *E*-stilbene in  $\text{CD}_2\text{Cl}_2$ .

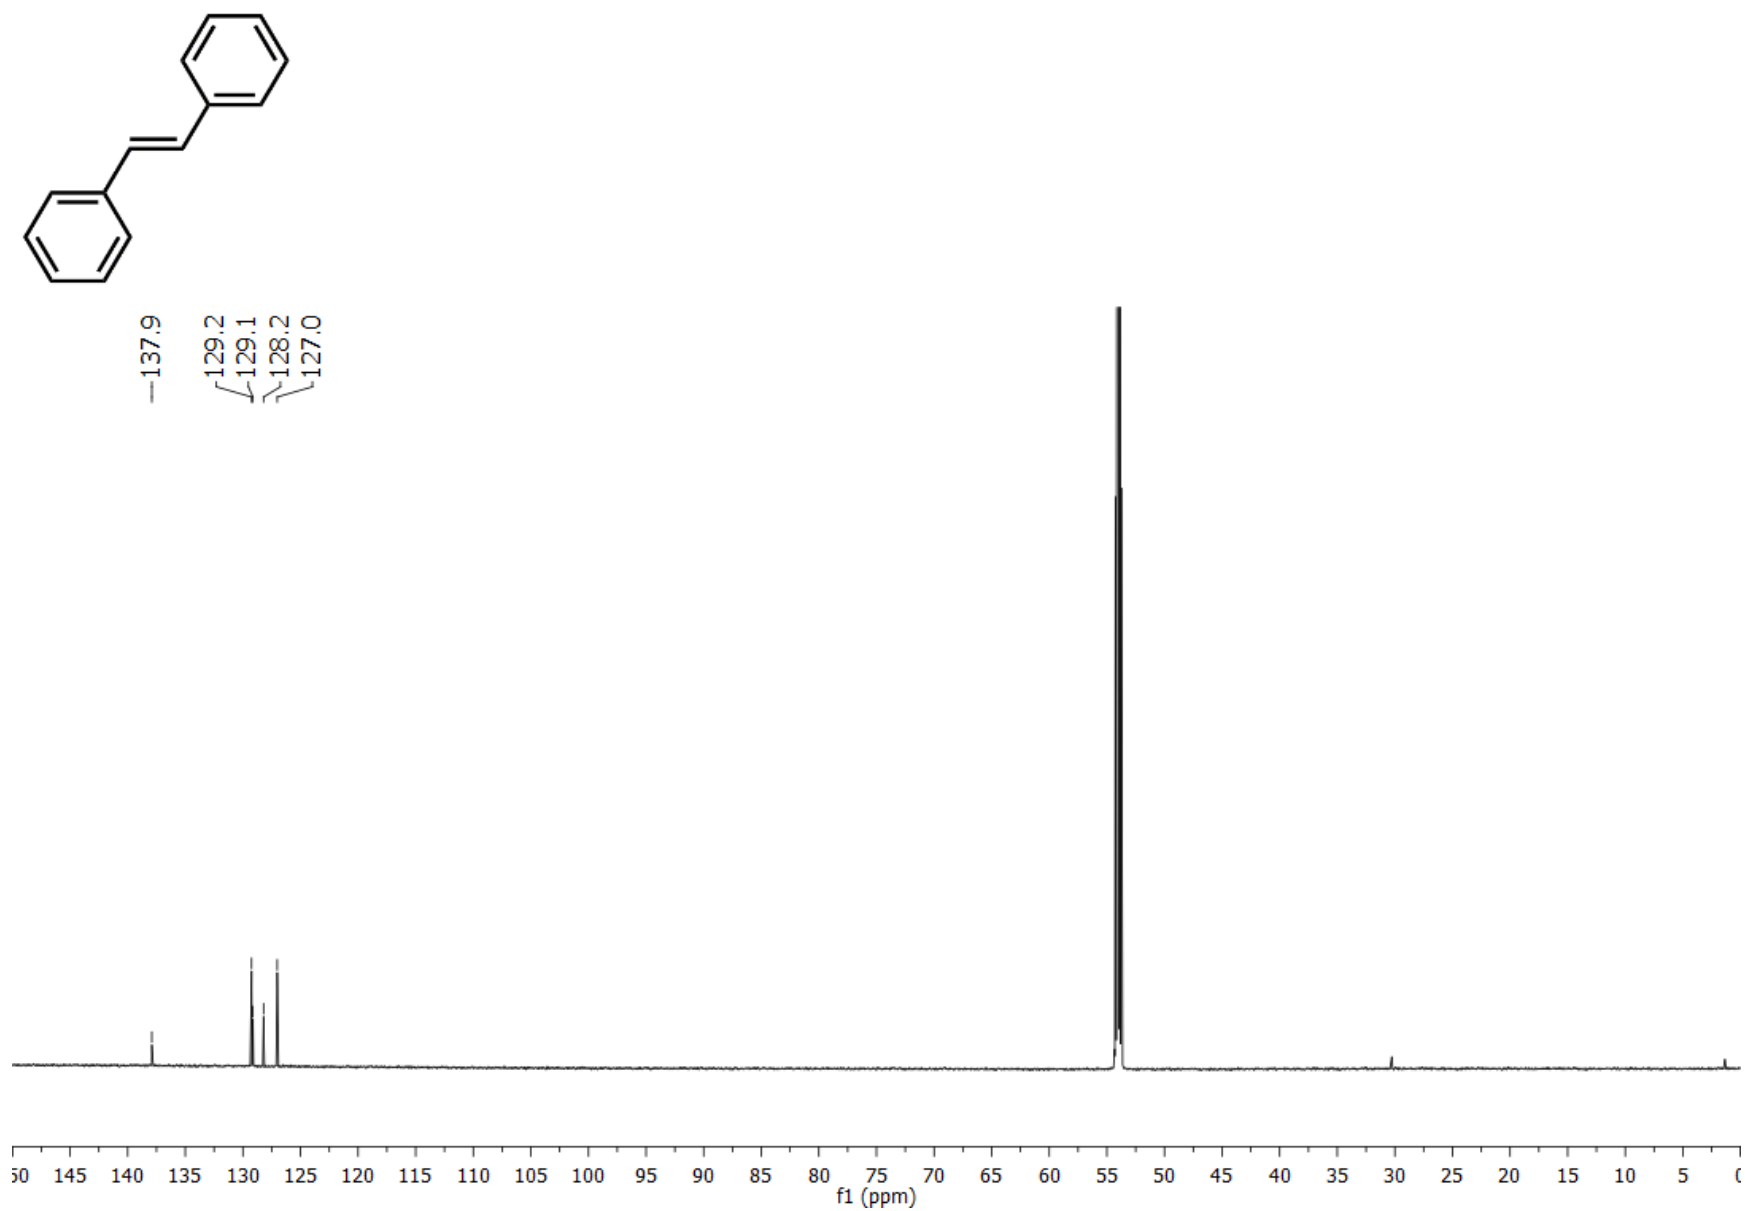

Figure S22. <sup>13</sup>C NMR spectrum of *E*-stilbene in CD<sub>2</sub>Cl<sub>2</sub> (fraction I).

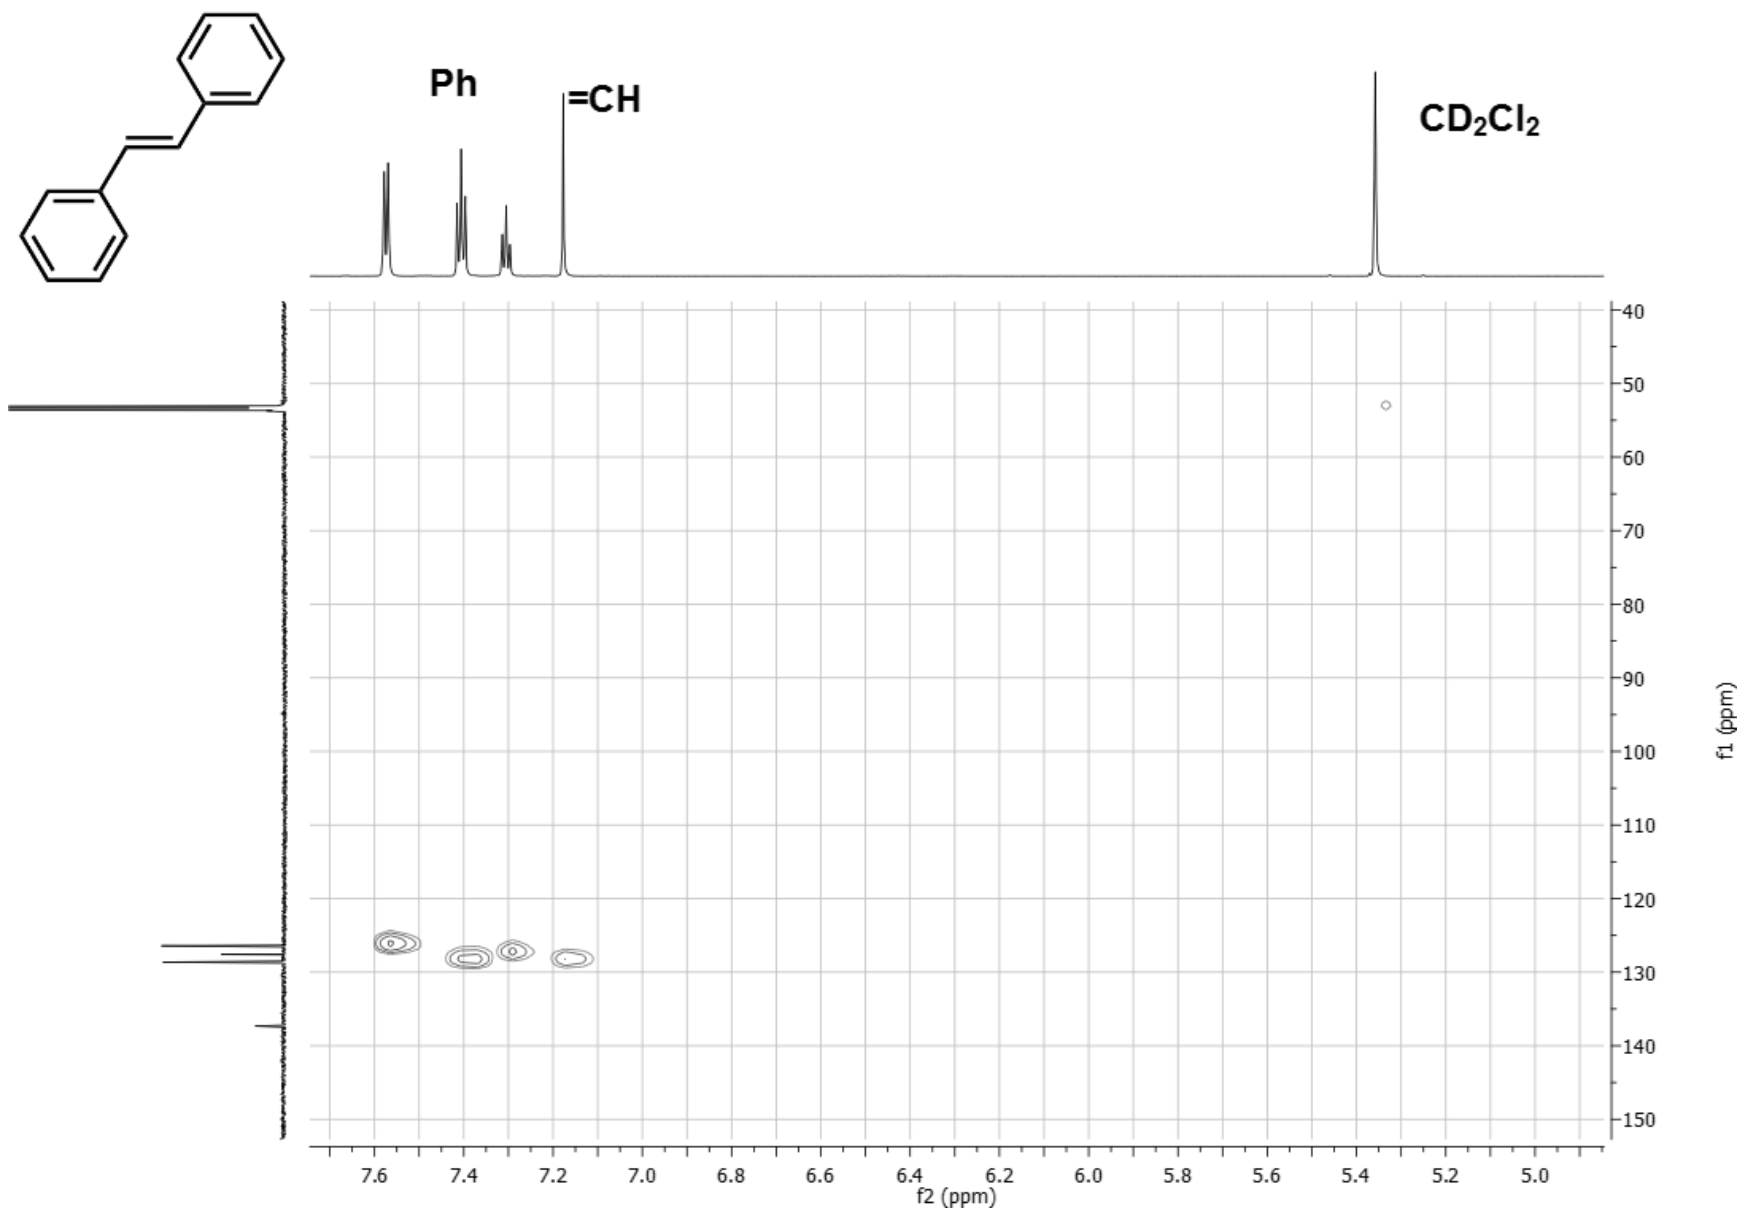

Figure S23. HSQC spectrum of *E*-stilbene in CD<sub>2</sub>Cl<sub>2</sub> (fraction I).

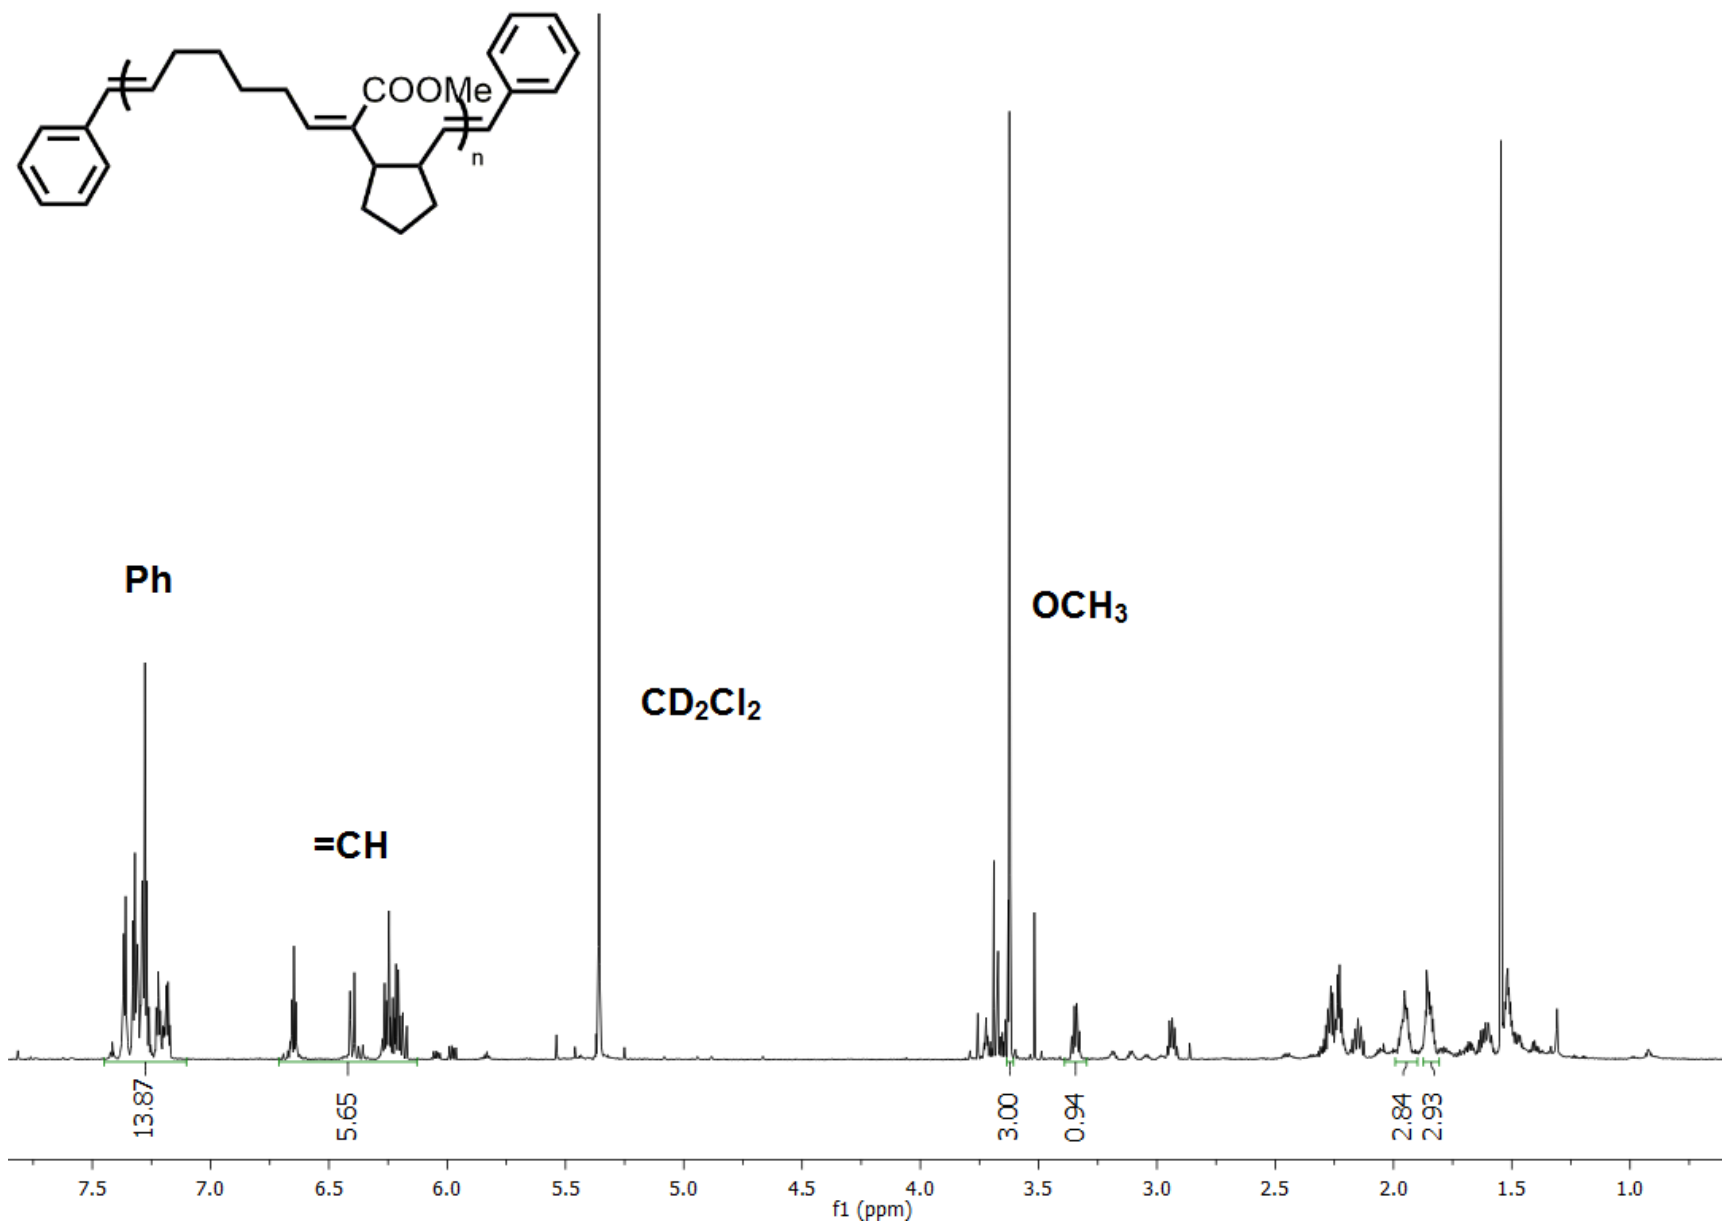

Figure S24. <sup>1</sup>H NMR spectrum of partially purified Ph-(3-*alt*-6)-Ph in CD<sub>2</sub>Cl<sub>2</sub> (fraction II).

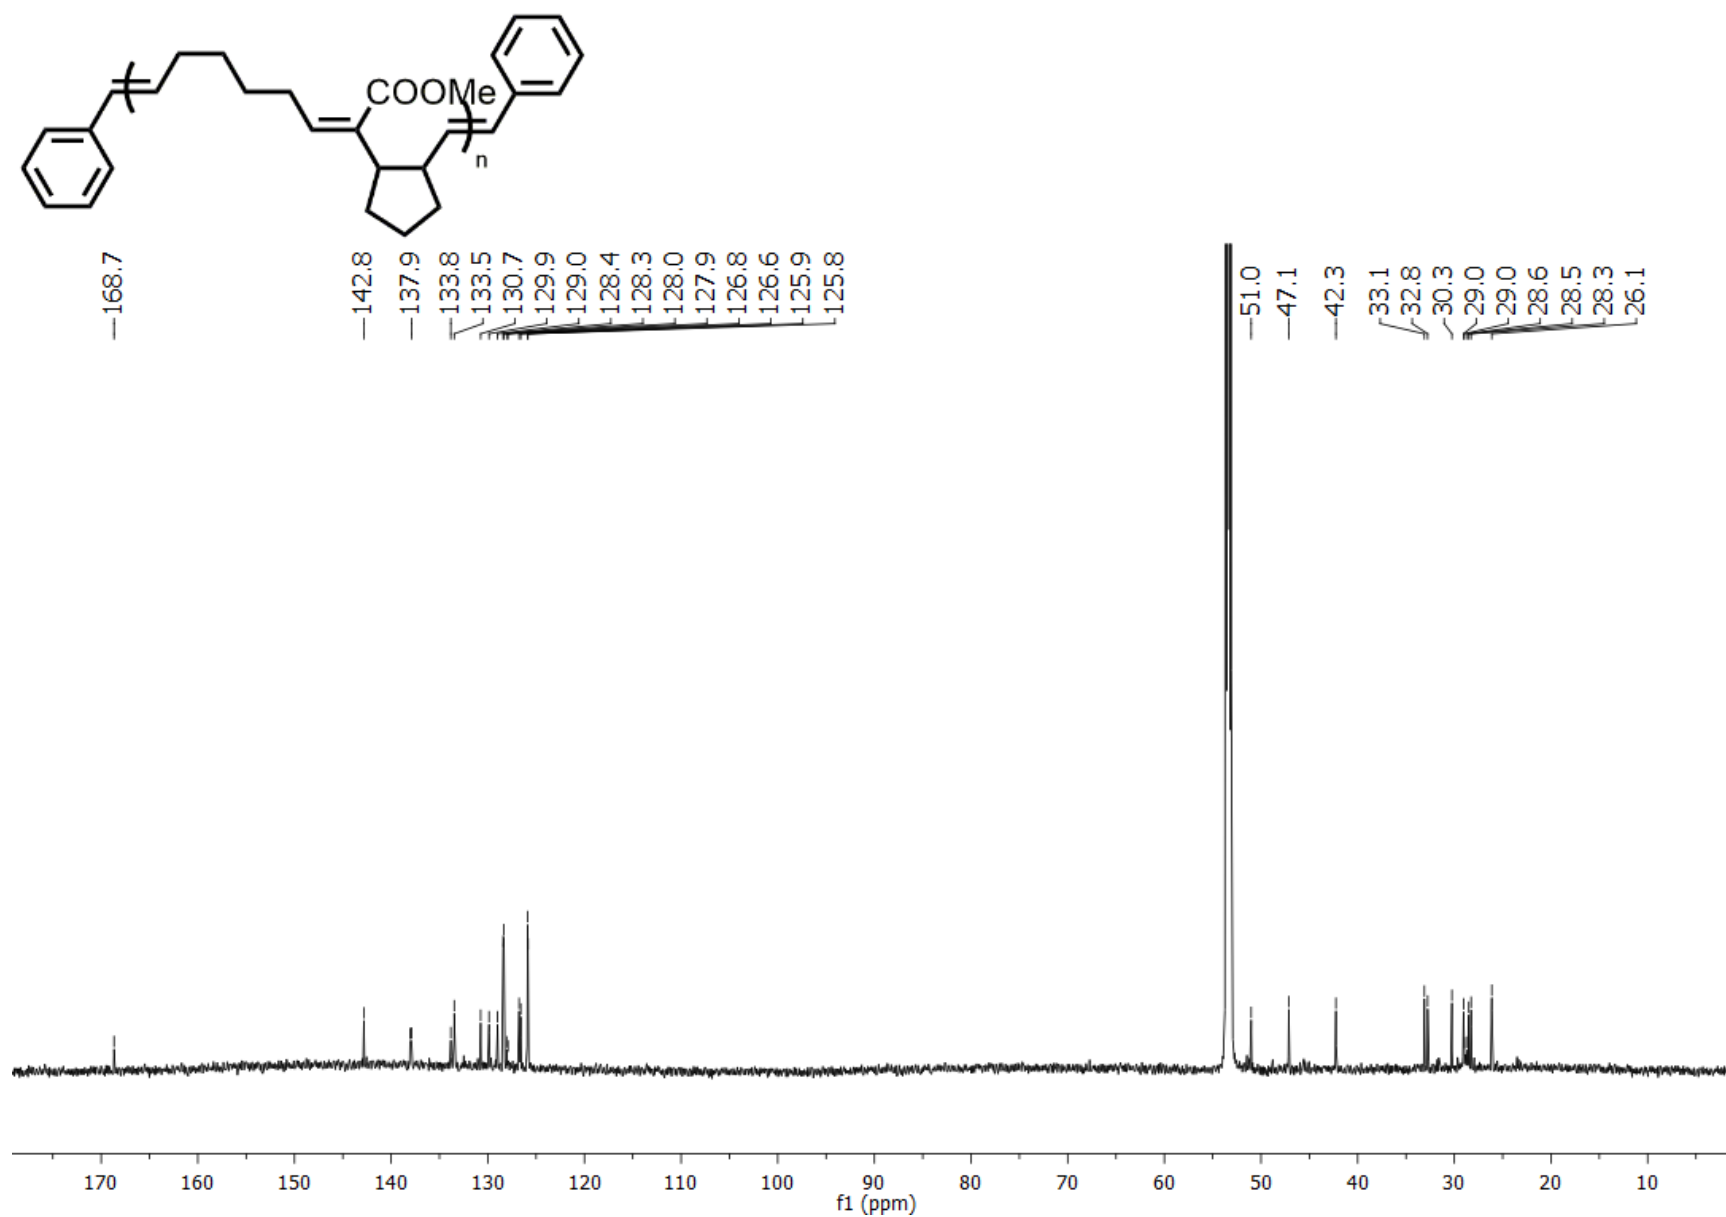

Figure S25. <sup>13</sup>C NMR spectrum of partially purified Ph-(3-*alt*-6)-Ph in CD<sub>2</sub>Cl<sub>2</sub> (fraction II).

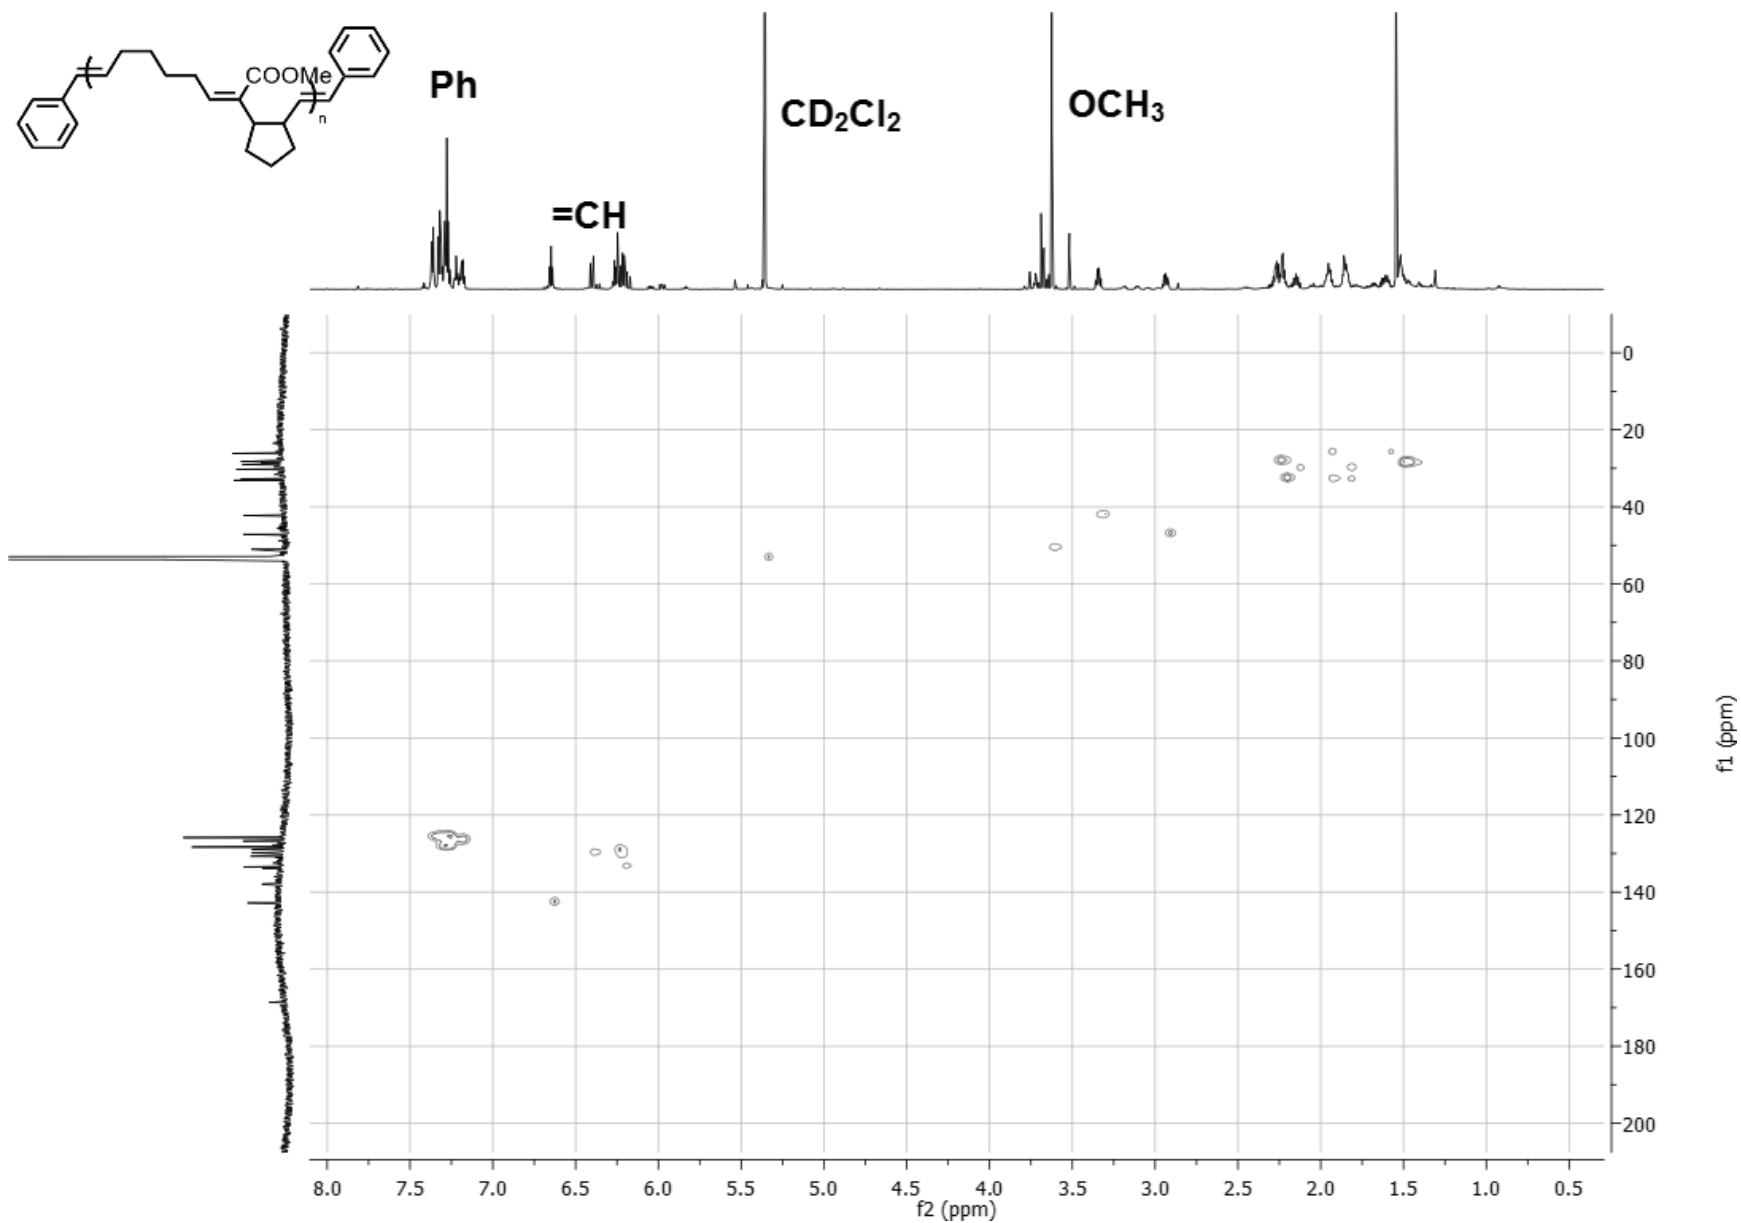

Figure S26.  $^1\text{H}$  NMR spectrum of partially purified Ph-(3-*alt*-6)-Ph in  $\text{CD}_2\text{Cl}_2$  (fraction II).

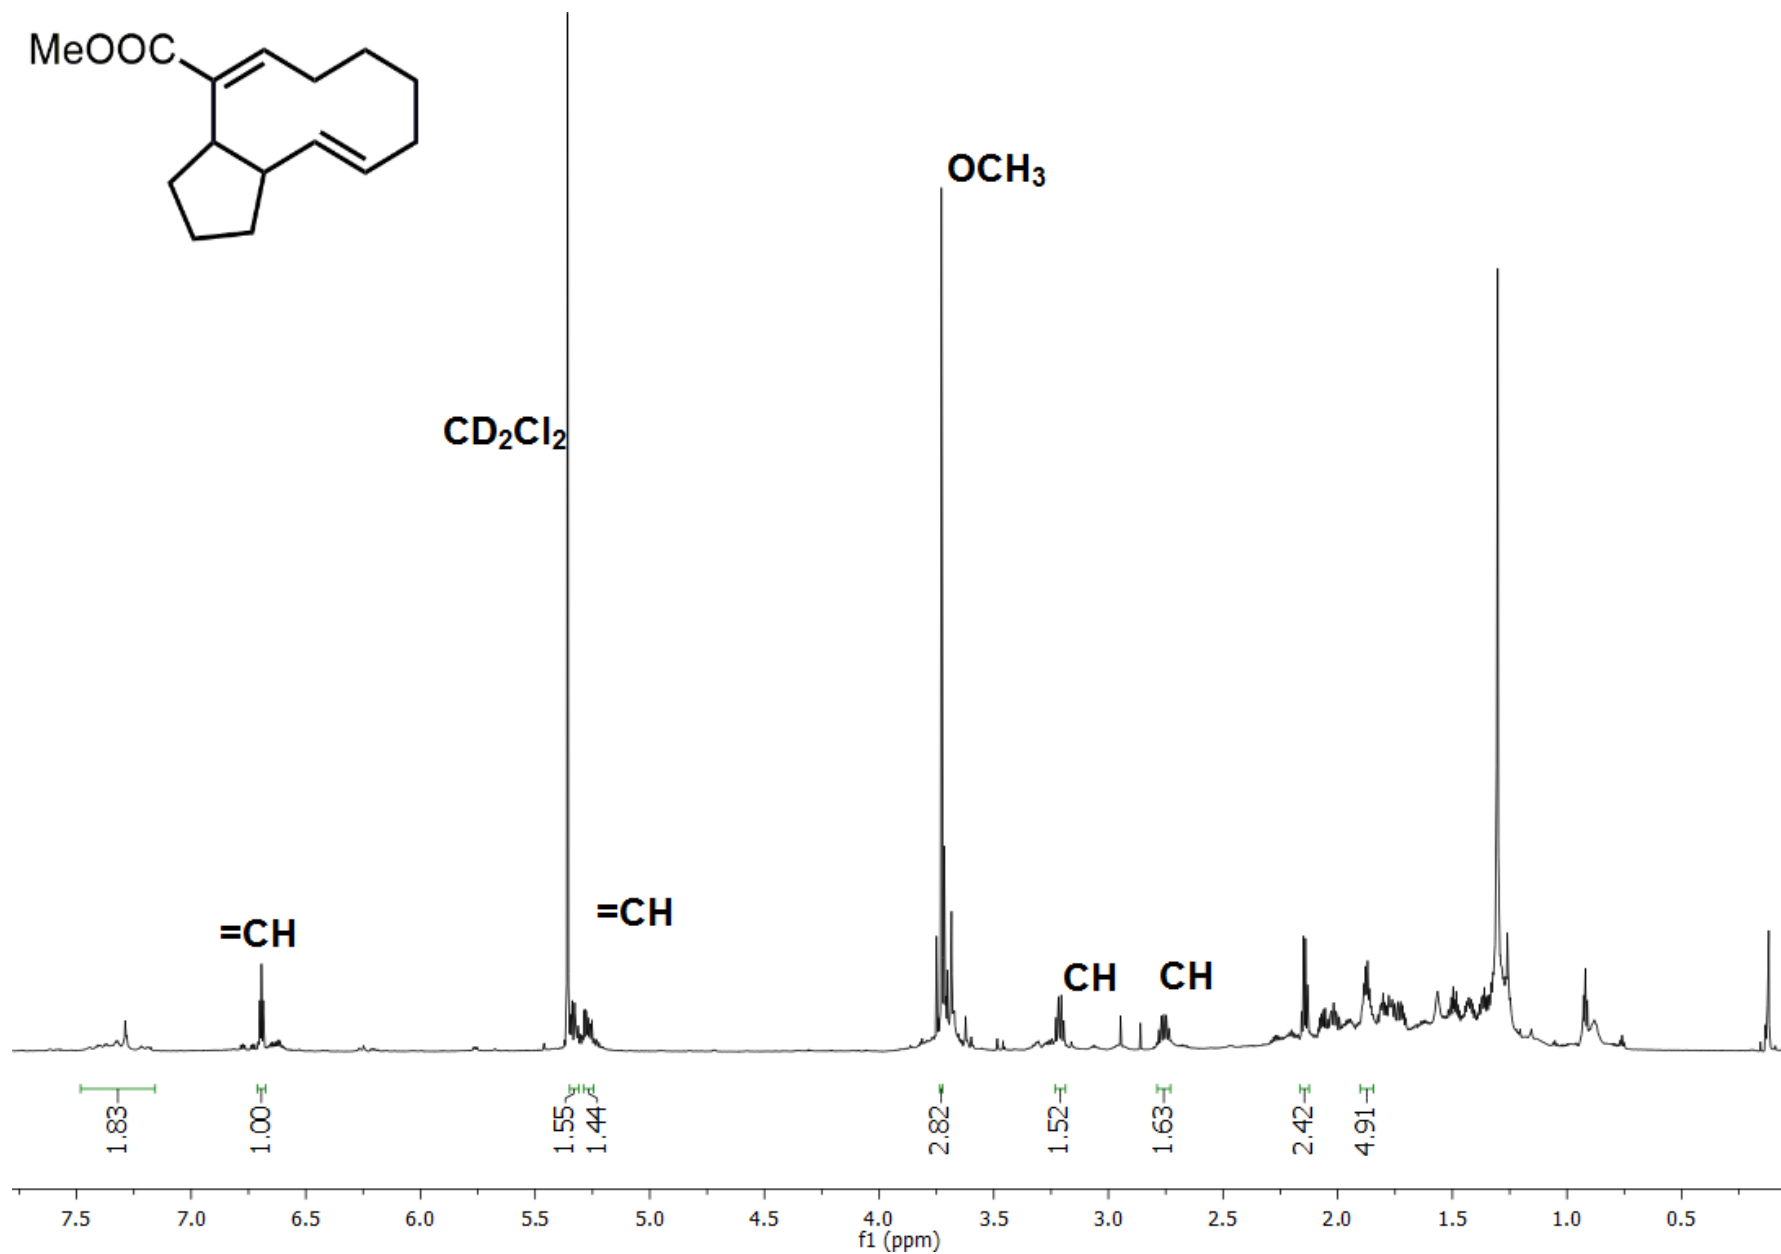

Figure S27.  $^1\text{H}$  NMR spectrum of partially purified *cyc*-(3-*alt*-6)<sub>1</sub> in  $\text{CD}_2\text{Cl}_2$  (fraction III).



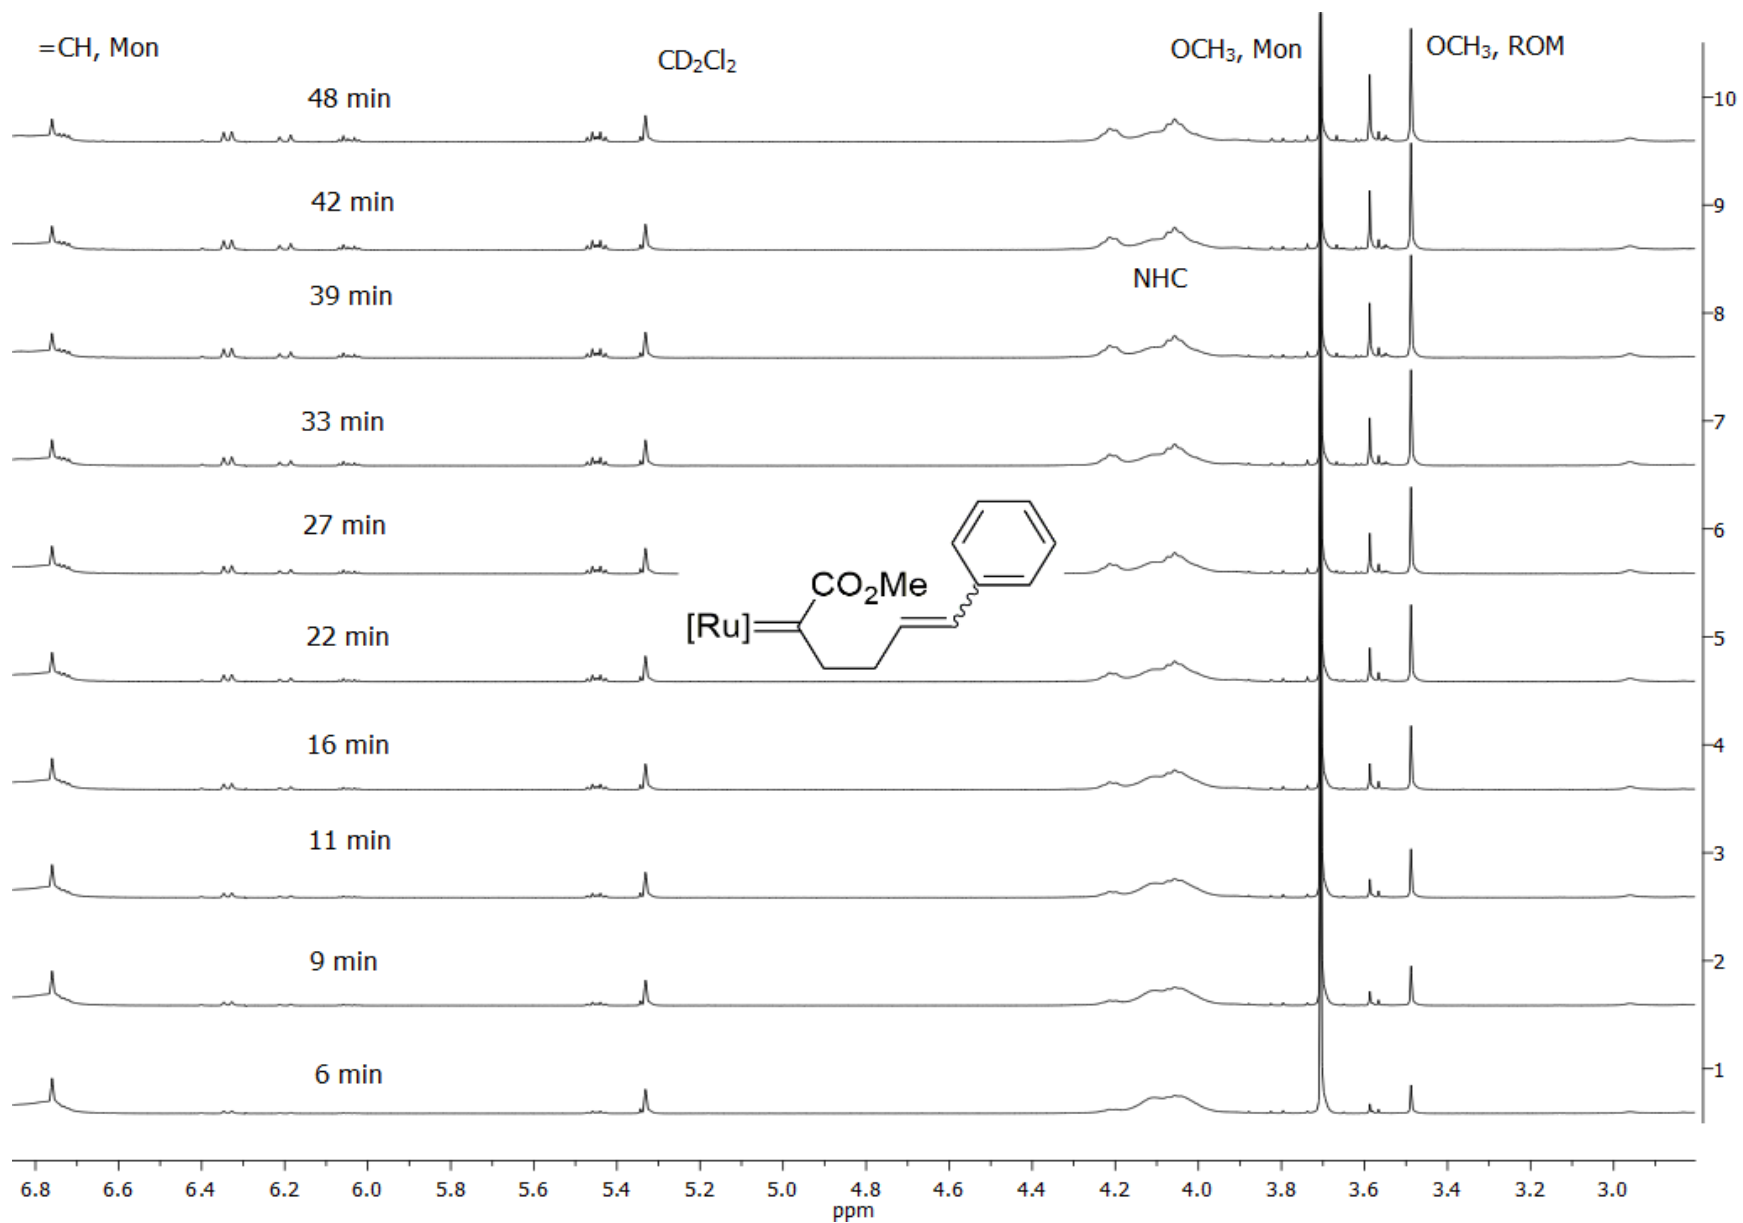

Figure S28. ROM of monomer **1** in CD<sub>2</sub>Cl<sub>2</sub> monitored by <sup>1</sup>H NMR spectroscopy as a function of time.

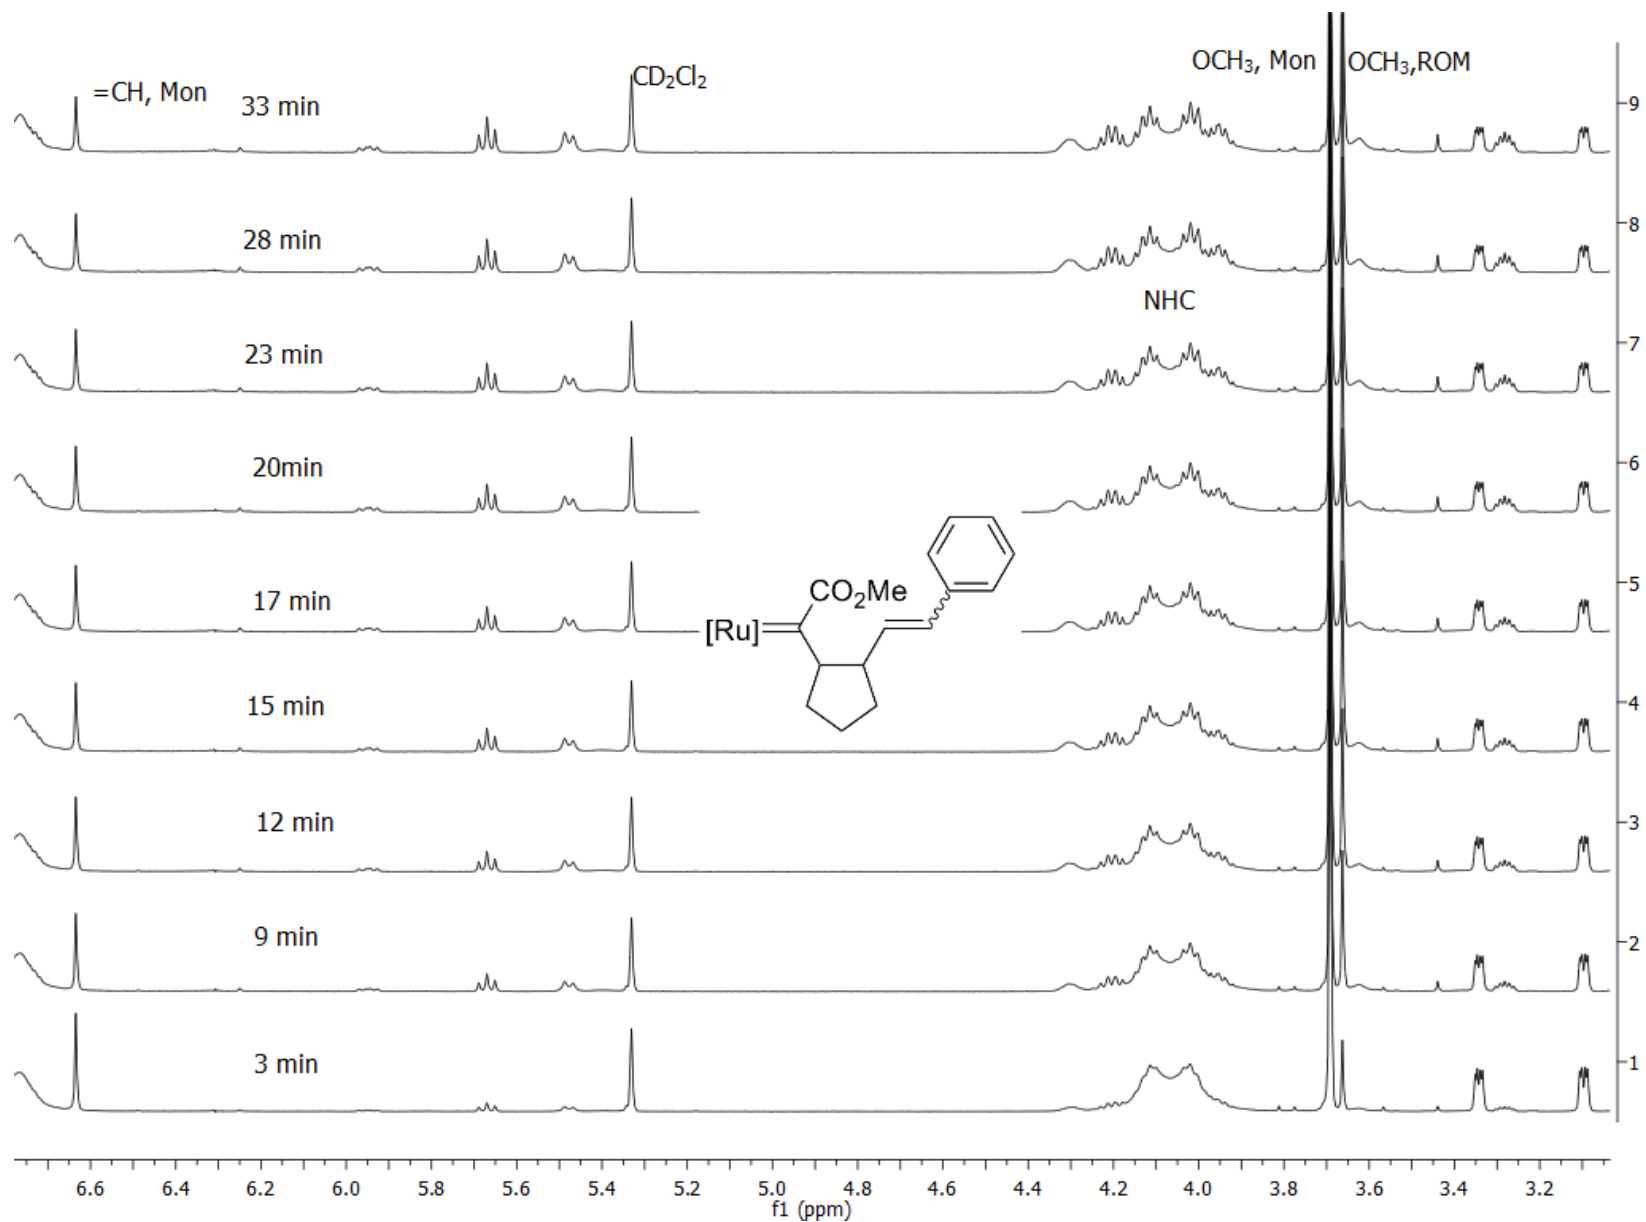

Figure S29. ROM of monomer **3** in  $\text{CD}_2\text{Cl}_2$  monitored by  $^1\text{H}$  NMR spectroscopy as a function of time.

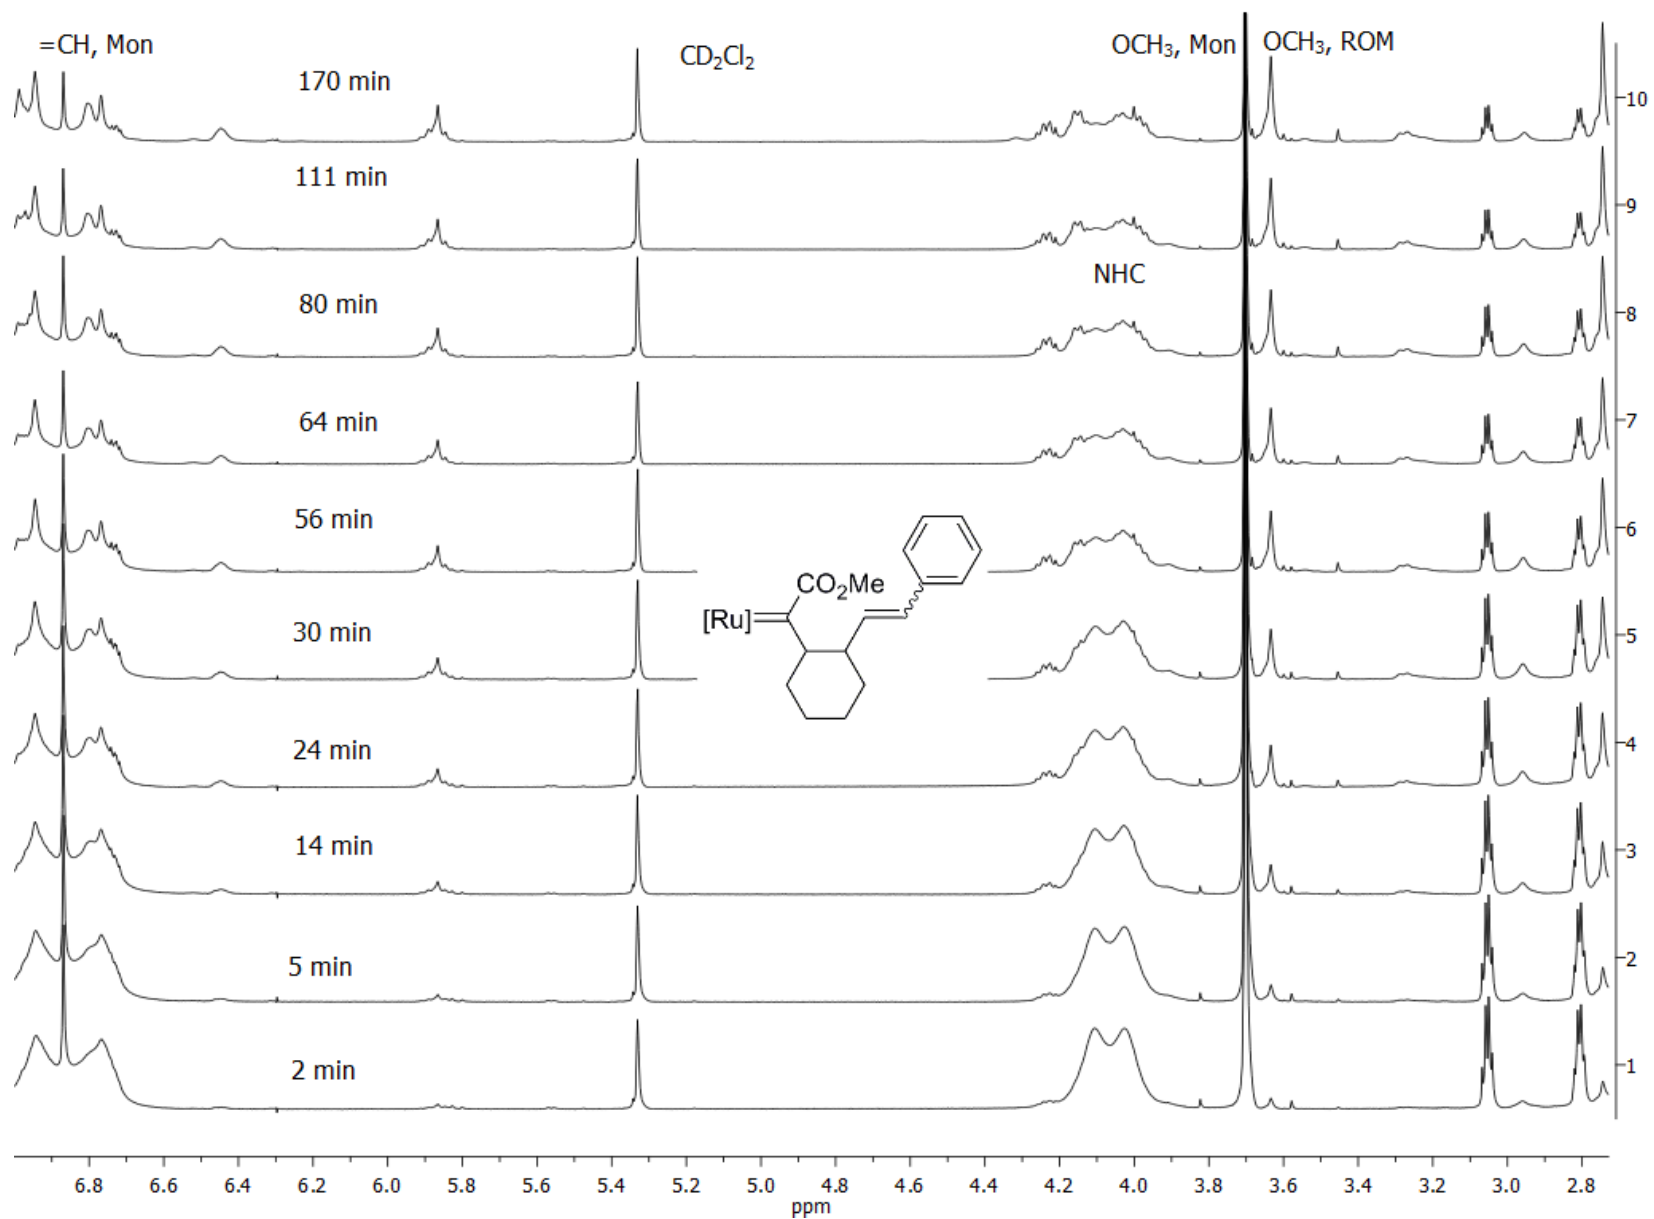

Figure S30. ROM of monomer **4** in  $\text{CD}_2\text{Cl}_2$  monitored by  $^1\text{H}$  NMR spectroscopy as a function of time.

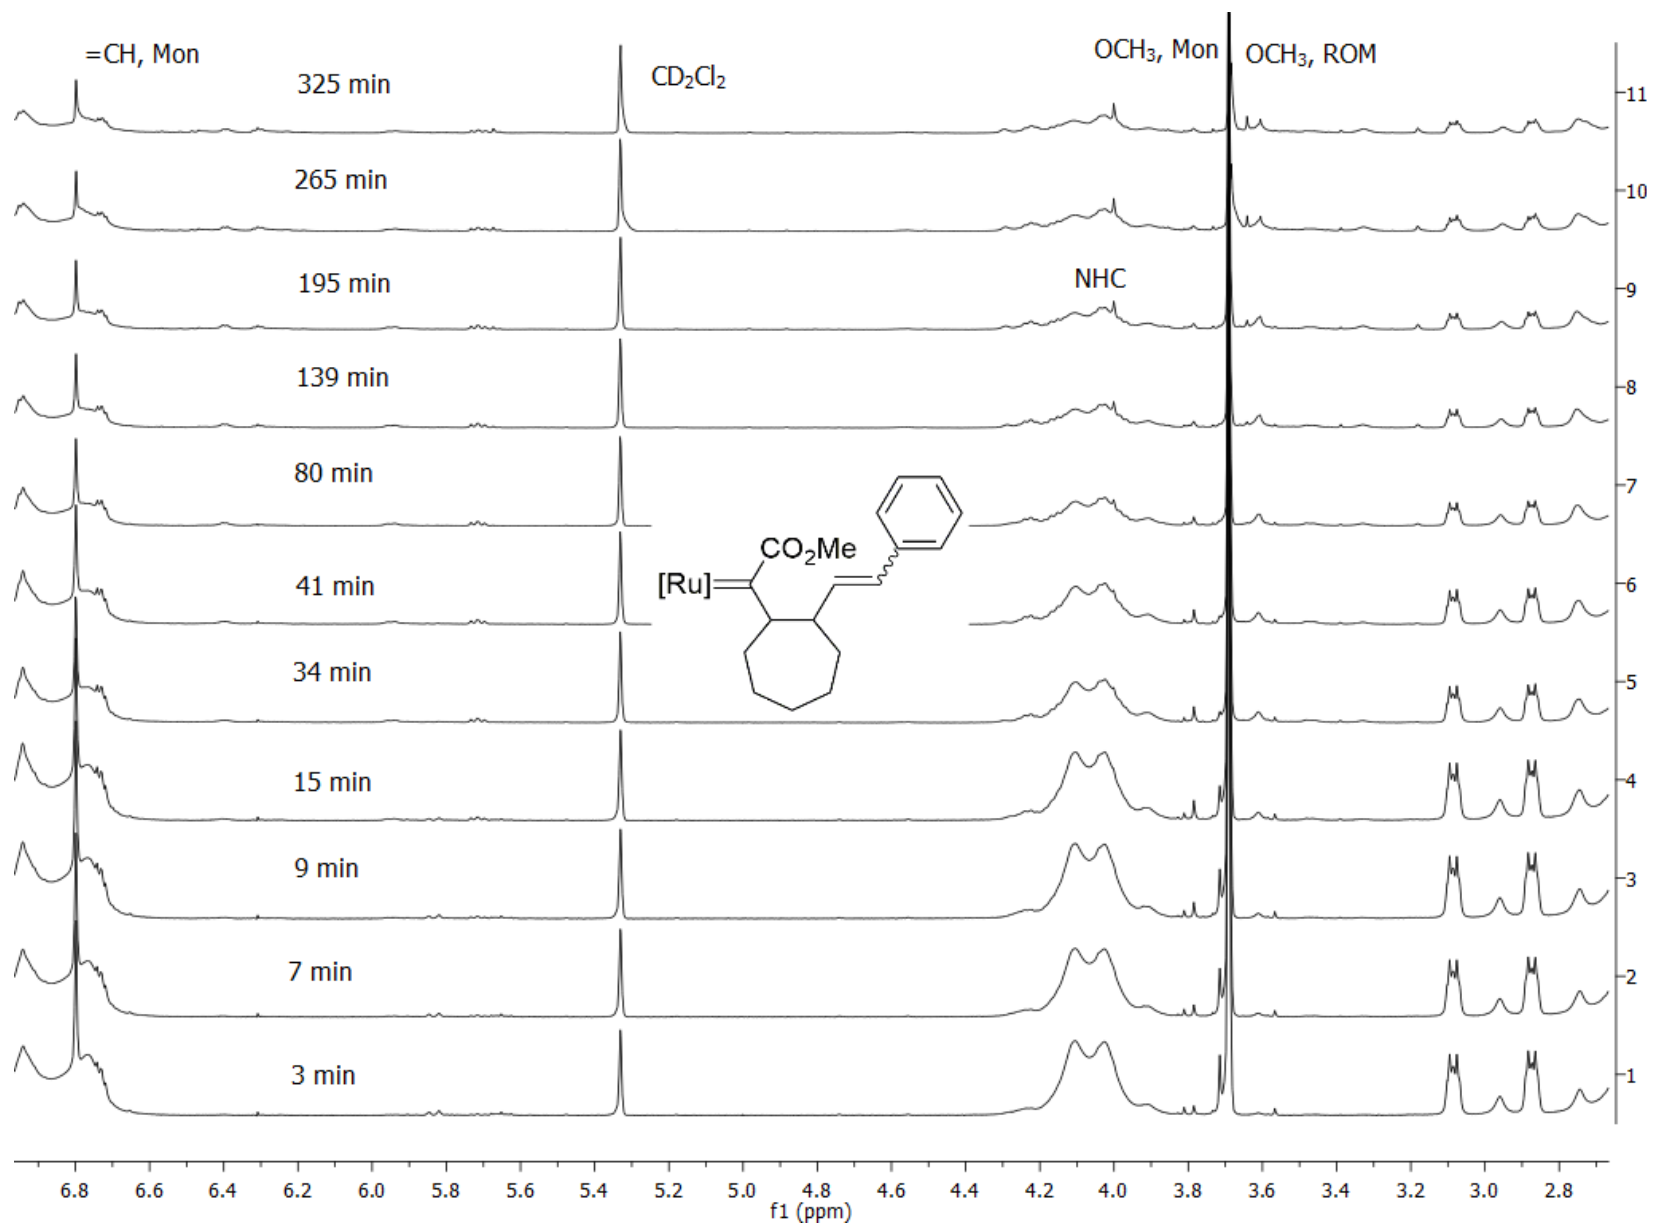

Figure S31. ROM of monomer **5** in CD<sub>2</sub>Cl<sub>2</sub> monitored by <sup>1</sup>H NMR spectroscopy as a function of time.

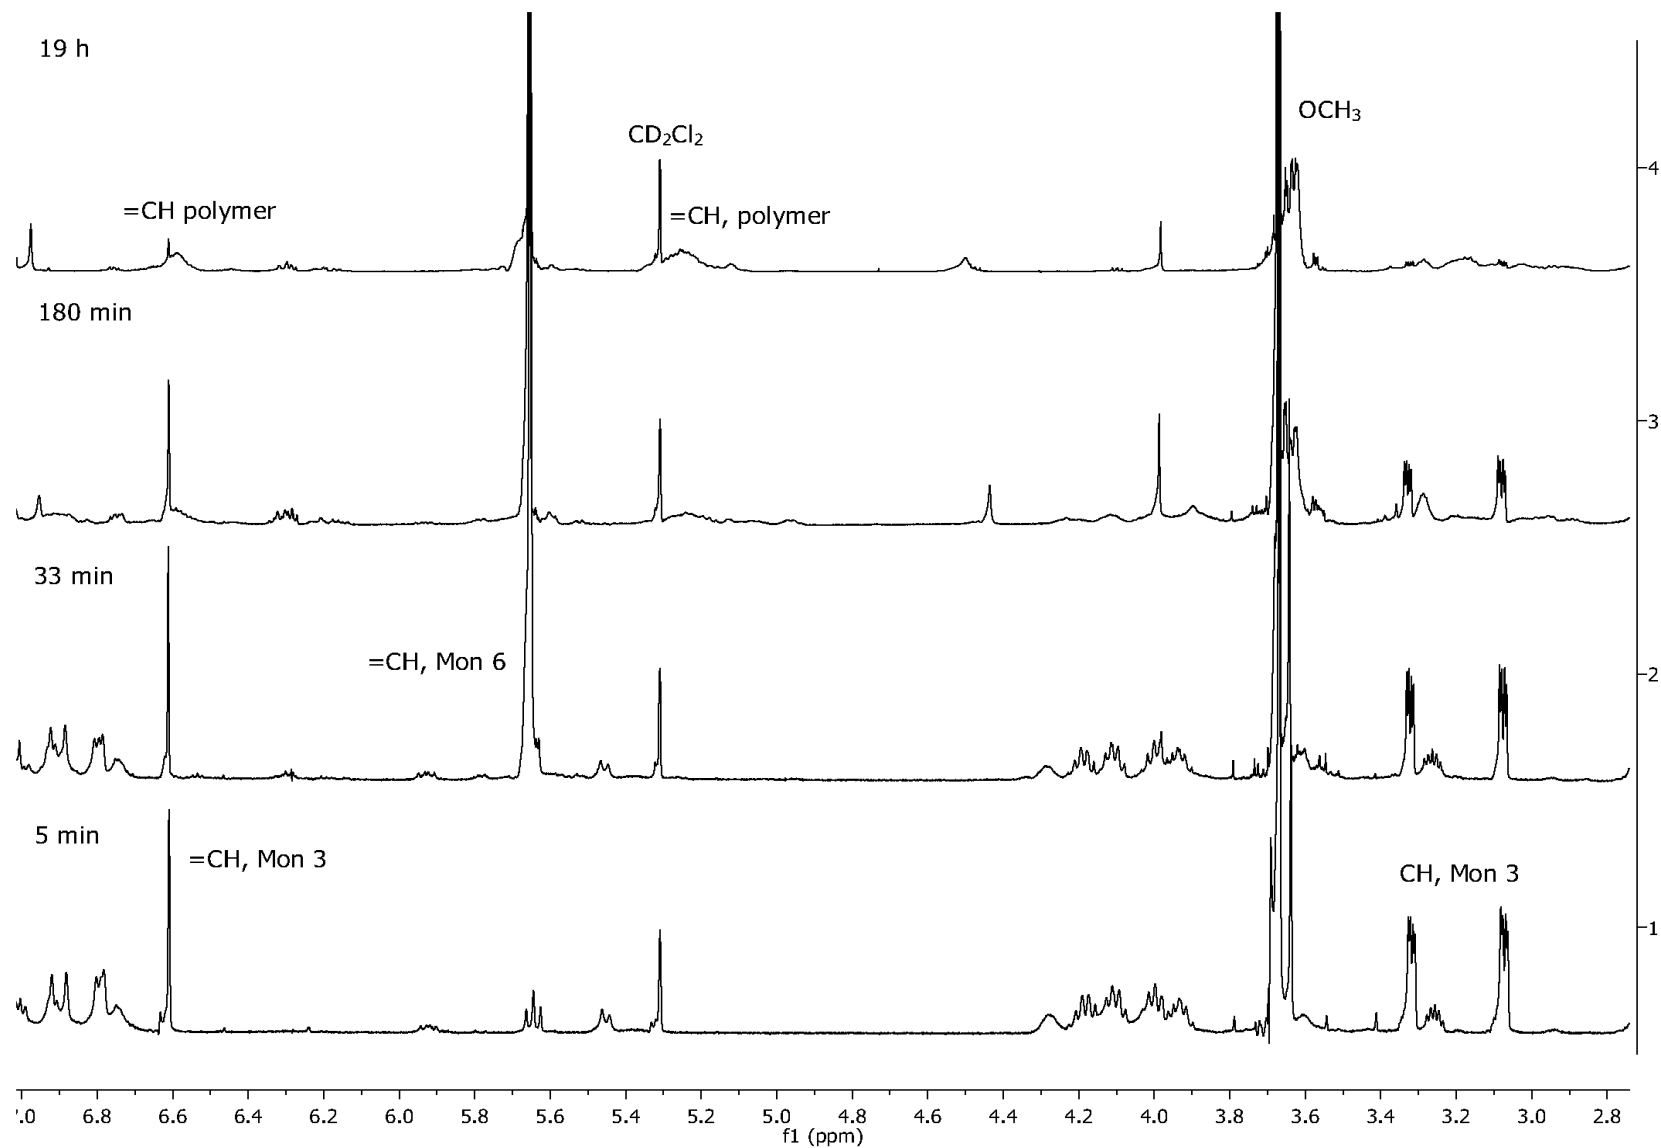

Figure S32. AROMP of monomer **3** and cyclohexene **6** ([Ru]:**3**:**6**=1:25:50) in CD<sub>2</sub>Cl<sub>2</sub> monitored by <sup>1</sup>H NMR spectroscopy as a function of time.

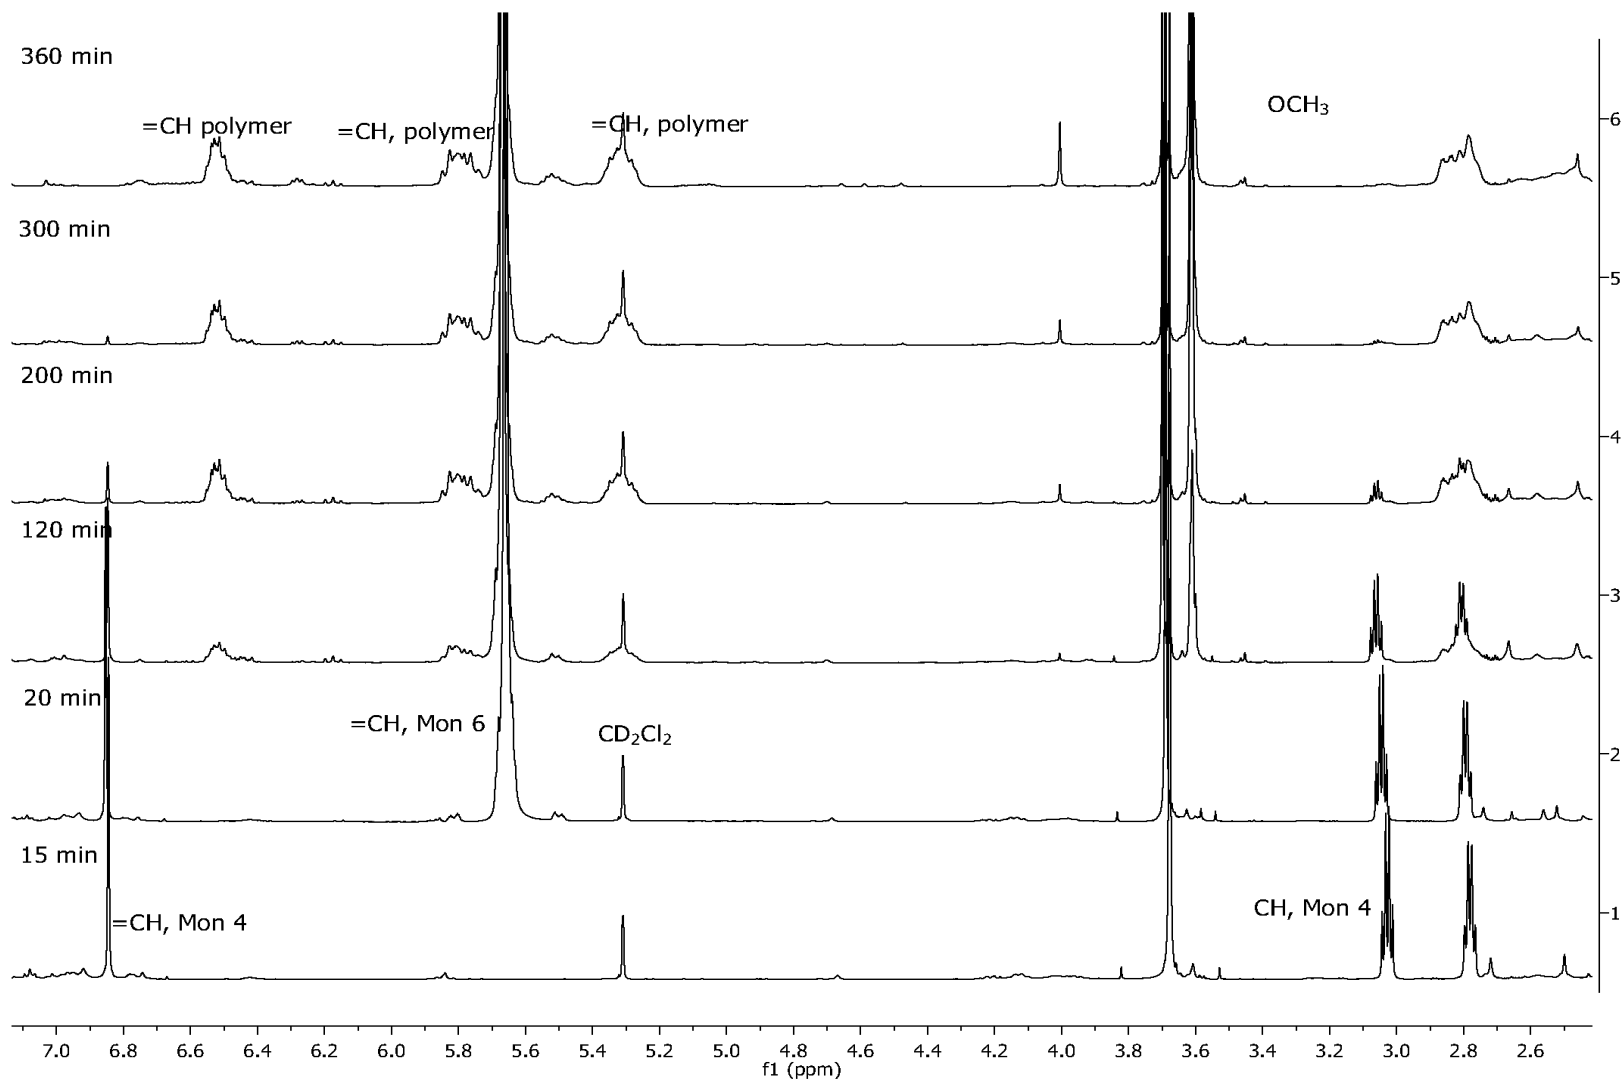

Figure S33. AROMP of monomer **4** and cyclohexene **6** ([Ru]:**4**:**6**=1:20:40) in CD<sub>2</sub>Cl<sub>2</sub> monitored by  $^1\text{H}$  NMR spectroscopy as a function of time.

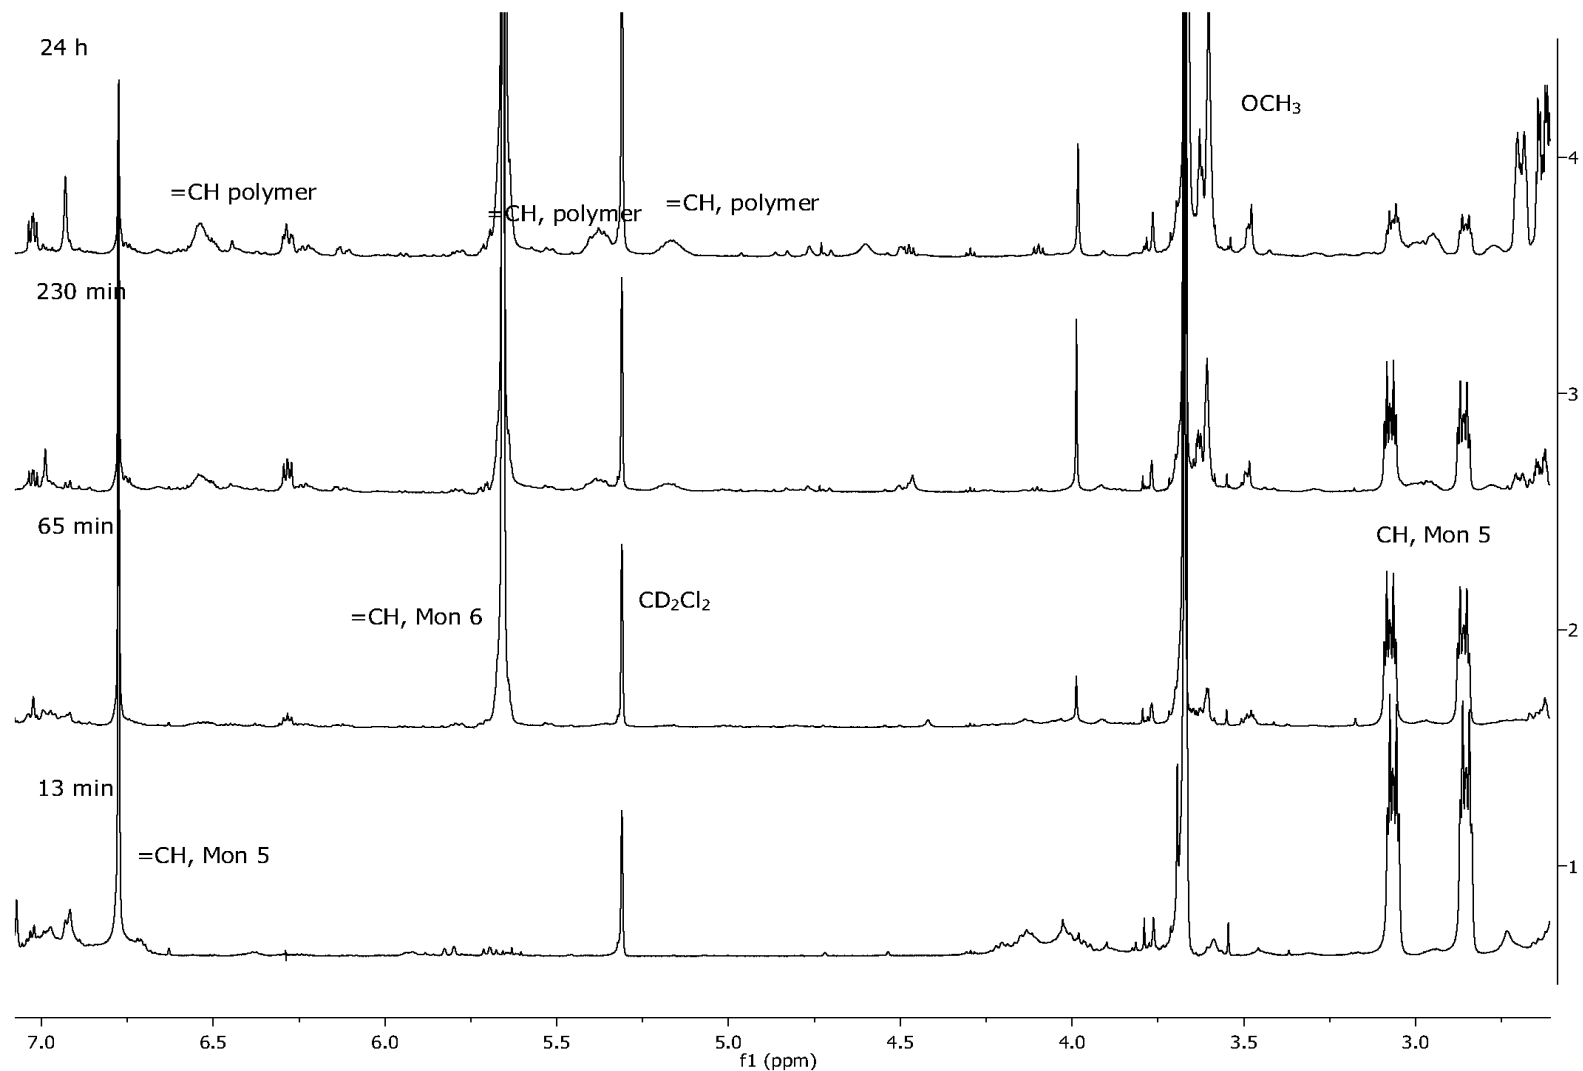

Figure S34. AROMP of monomer **5** and cyclohexene **6** ([Ru]:**5**:**6**=1:50:100) in CD<sub>2</sub>Cl<sub>2</sub> monitored by  $^1\text{H}$  NMR spectroscopy as a function of time.

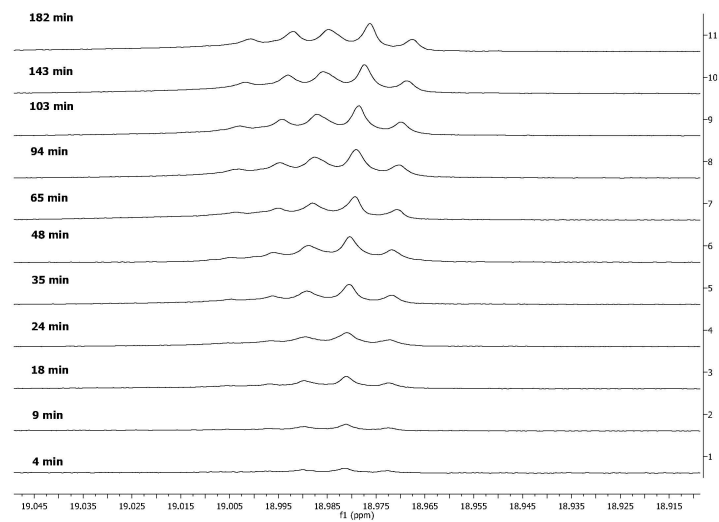

Figure S35. The AROM conversion of [Ru]-**4** enic carbene to [Ru]-**6-4** alkylidene with excess cyclohexene **6** in CD<sub>2</sub>Cl<sub>2</sub>.



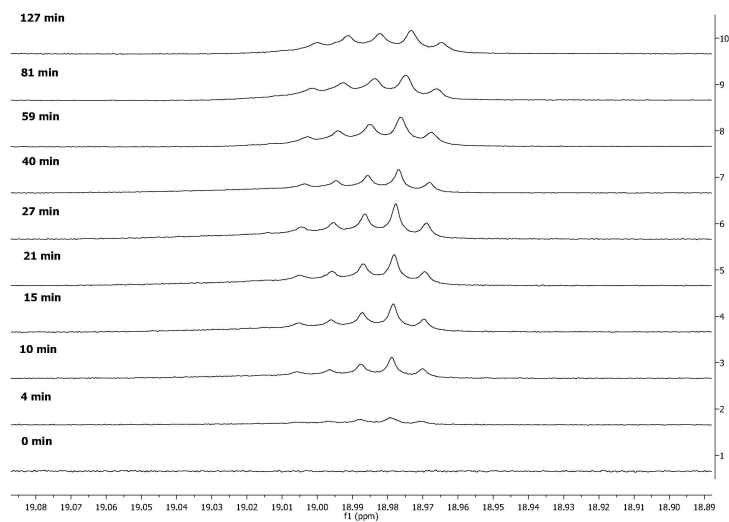

Figure S36. The AROM conversion of [Ru]-**3** enoic carbene to [Ru]-**6-3** alkylidene with excess cyclohexene **6** in CD<sub>2</sub>Cl<sub>2</sub>.

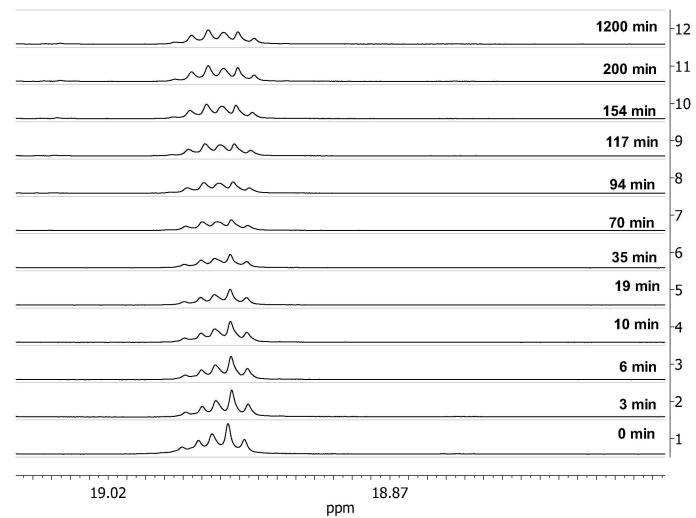

Figure S37. Conversion of [Ru]-**6-4** alkylidene (1 eq) to [Ru]-**6-4-6-4** alkylidene in double AROM (AROM-2) with monomer **4** (1 eq) in the presence of excess cyclohexene **6** in CD<sub>2</sub>Cl<sub>2</sub>.

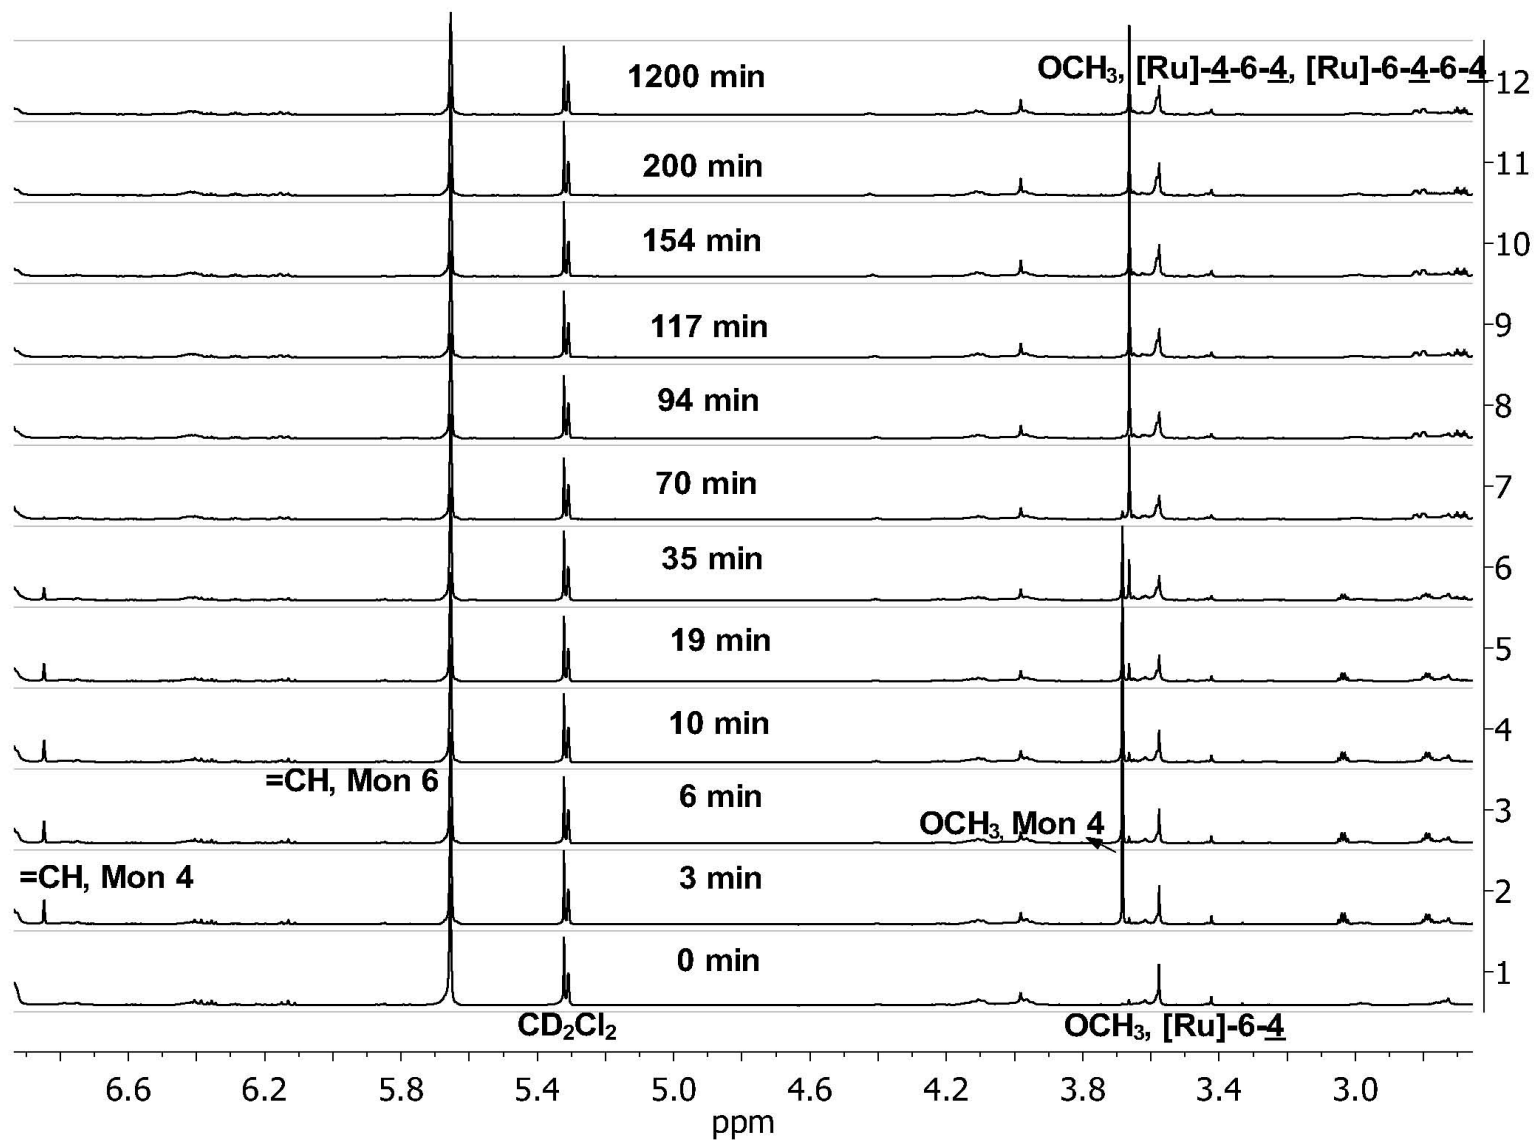

Figure S38. Conversion of monomer **4** (1 eq) in double AROM (AROM-2) with [Ru]-**6-4** (1 eq) and excess cyclohexene **6** in CD<sub>2</sub>Cl<sub>2</sub>.

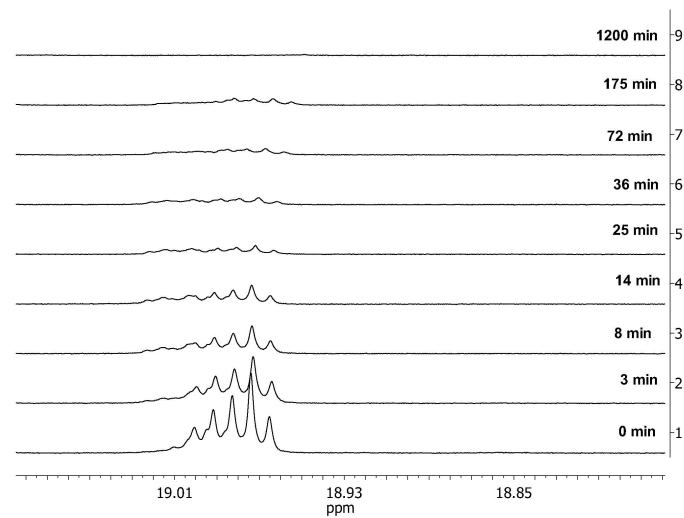

Figure S39. Conversion of [Ru]-**6-3** alkylidene (1 eq) to [Ru]-**6-3-6-3** alkylidene in double AROM (AROM-2) with monomer **3** (1eq) in the presence of excess cyclohexene **6** in CD<sub>2</sub>Cl<sub>2</sub>.

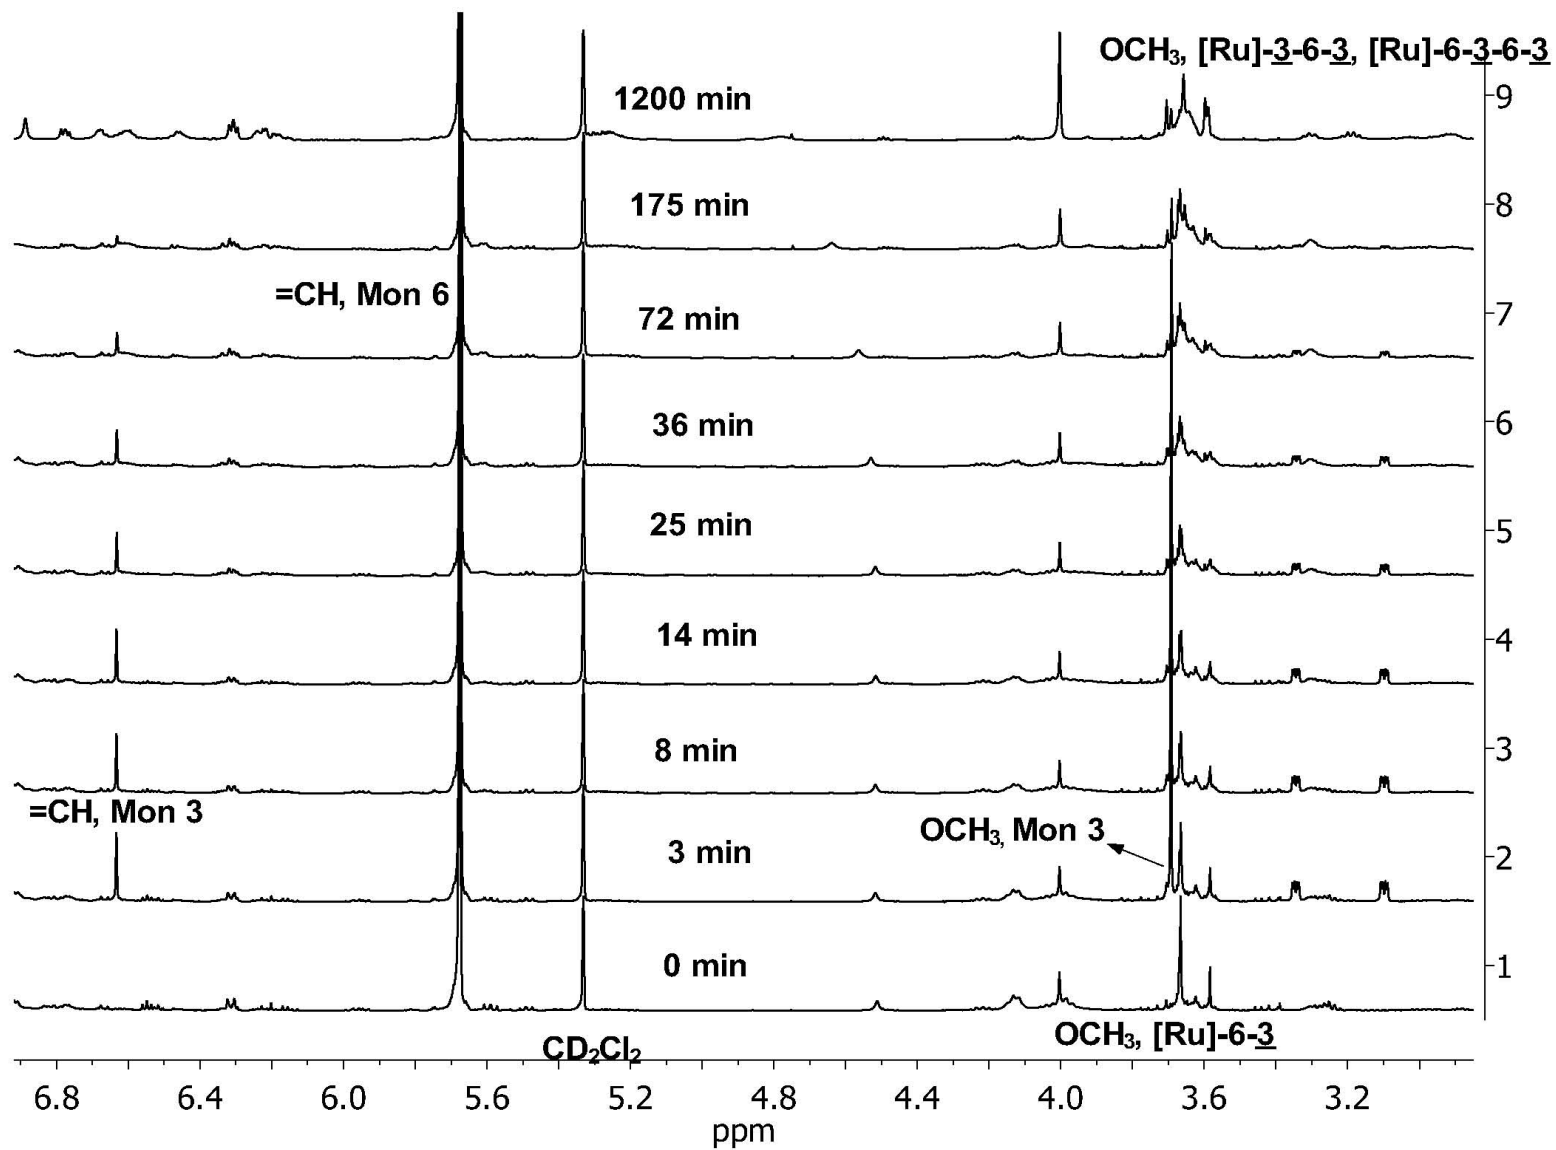

Figure S40. Conversion of monomer **3** (1 eq) in double AROM (AROM-2) with [Ru]-**6-3** (1 eq) and excess cyclohexene **6** in CD<sub>2</sub>Cl<sub>2</sub>.

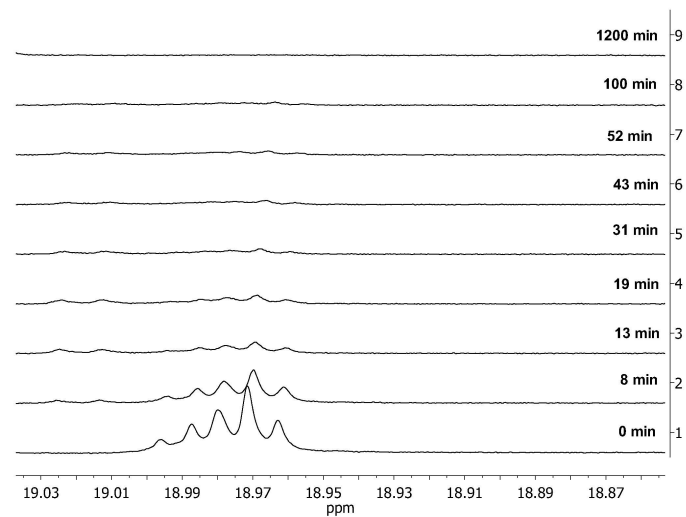

Figure S41. Conversion of [Ru]-**6-4** alkylidene (1 eq) to [Ru]-**6-3-6-4** alkylidene in double AROM (AROM-2) with monomer **3** (1 eq) in the presence of excess cyclohexene **6** in CD<sub>2</sub>Cl<sub>2</sub>.

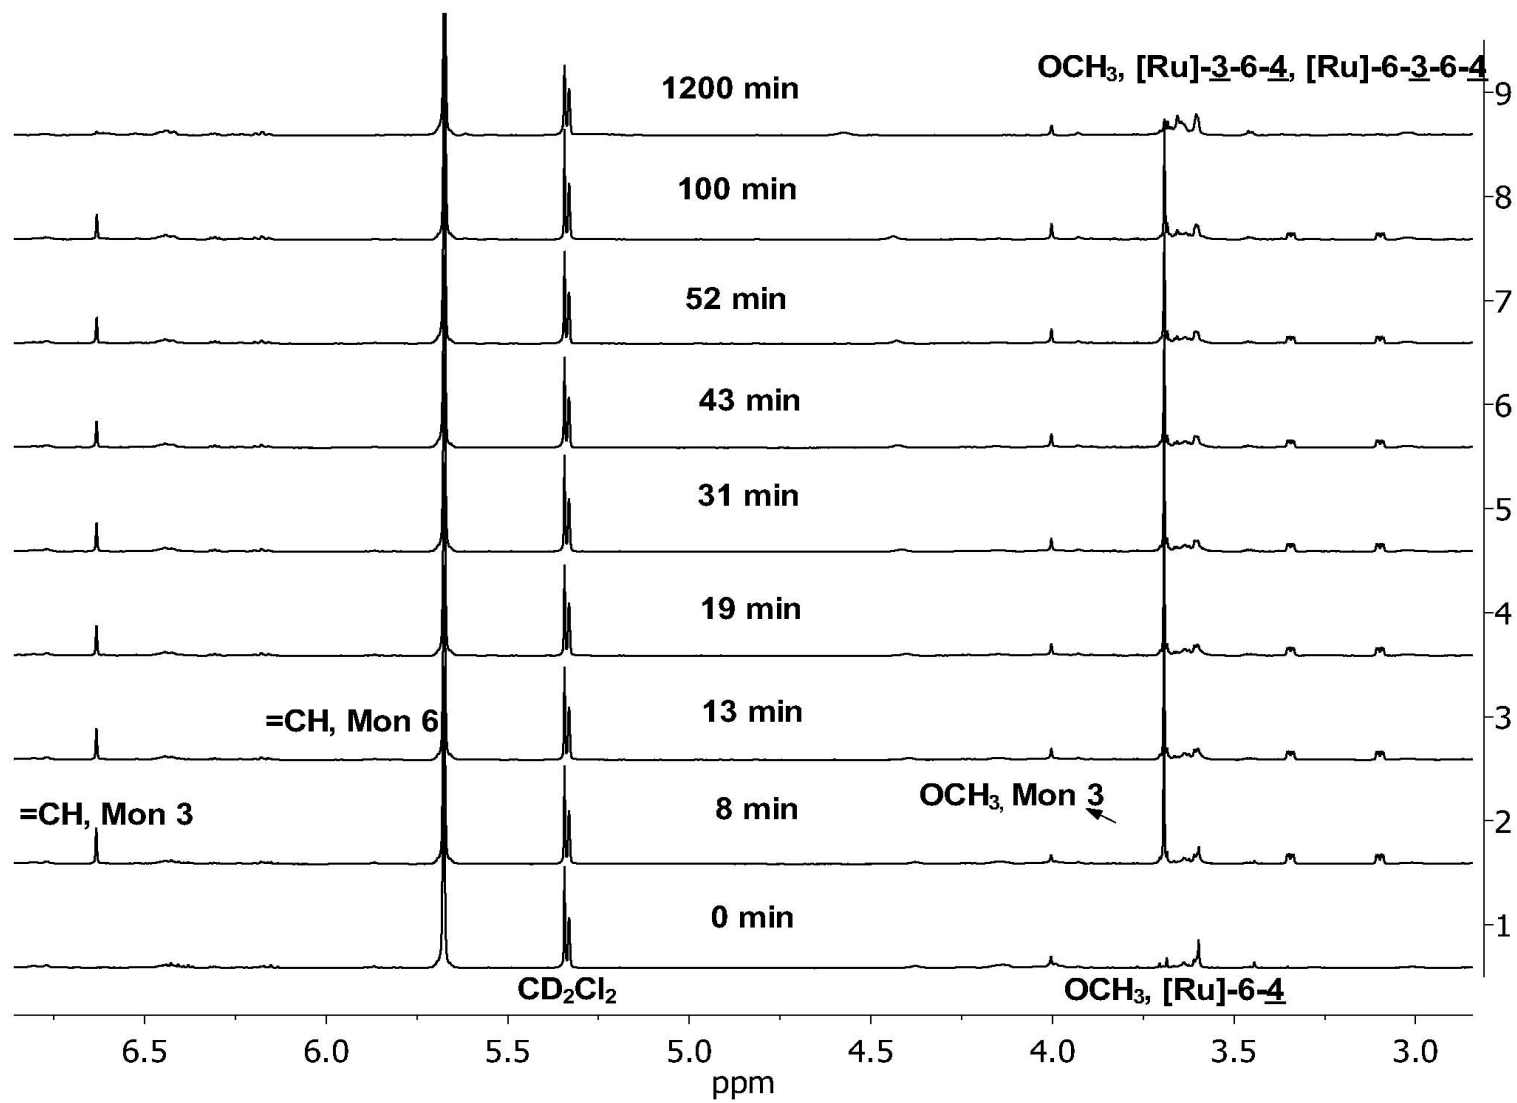

Figure S42. Conversion of monomer **3** (1 eq) in double AROM (AROM-2) with [Ru]-**6-4** (1 eq) and excess cyclohexene **6** in CD<sub>2</sub>Cl<sub>2</sub>.

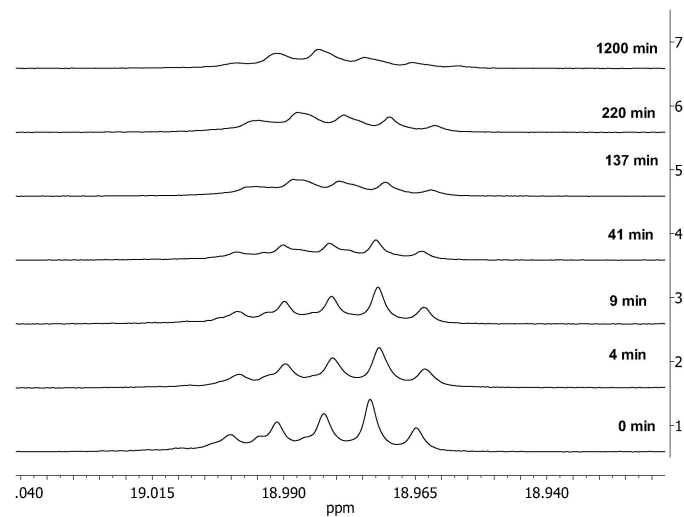

Figure S43. Conversion of [Ru]-**6-3** alkylidene (1 eq) to [Ru]-**6-4-6-3** alkylidene in double AROM (AROM-2) with monomer **4** (1 eq) in the presence of excess cyclohexene **6** in CD<sub>2</sub>Cl<sub>2</sub>.



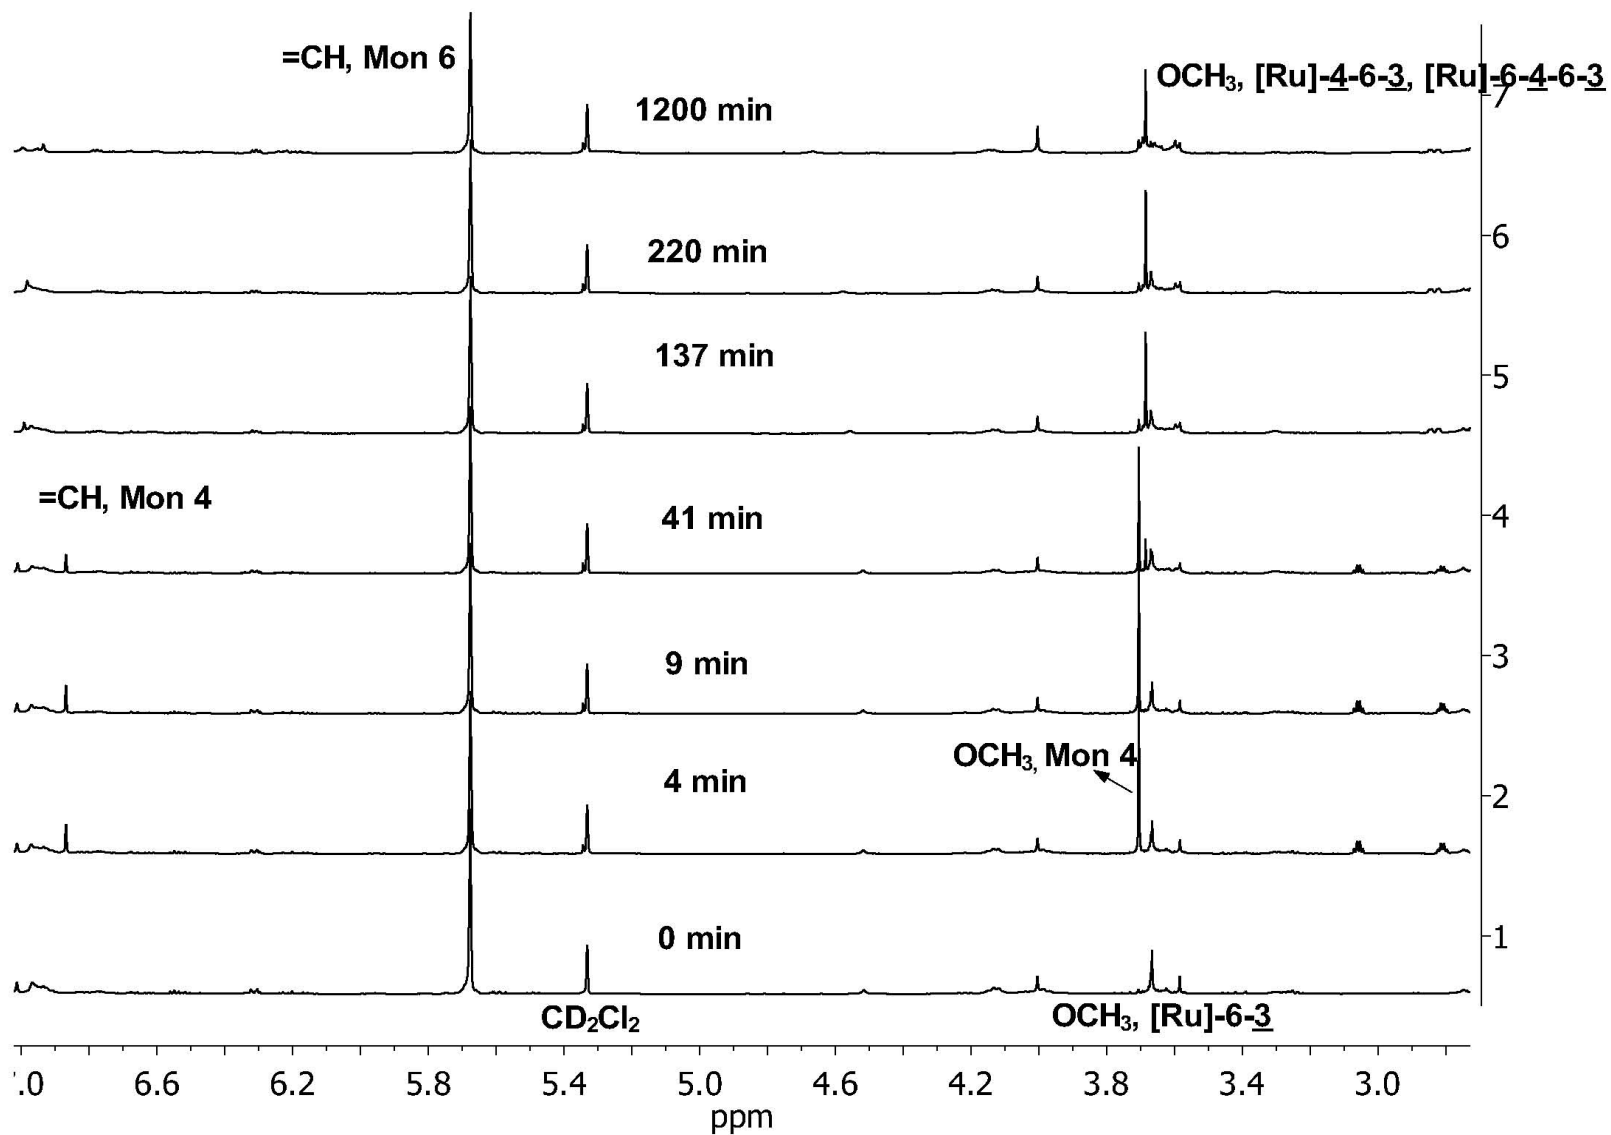

Figure S44. Conversion of monomer 4 (1 eq) in double AROM (AROM-2) with [Ru]-6-3 (1 eq) and excess cyclohexene 6 in CD<sub>2</sub>Cl<sub>2</sub>.

## References

- (1) Lapinte, V.; de Frémont, P.; Montembault, V.; Fontaine, L. *Macromol. Chem. Phys.* **2004**, "Ring opening metathesis polymerization (ROMP) of cis- and trans-3,4-bis(acetyloxymethyl)cyclobut-1-enes and synthesis of block copolymers," *205*, 1238-1245.  
10.1002/macp.200300224: 10.1002/macp.200300224.
